# Supplementary material for: 1-Trifluoromethylated isoquinolines via radical trifluoromethylation of isonitriles
Source: Royal Society of Chemistry journal article supplement (doi:10.1039/c4ob02145b), 2014-01-01

## *Supporting information*

### **1-Trifluoromethylated Isoquinolines via Radical Trifluoromethylation of Isonitriles**

Bo Zhang and Armido Studer\*

*Institute of Organic Chemistry, Westfälische Wilhelms-University Münster,  
Corrensstrasse 40, 48149 Münster, Germany*

*Fax: +49 (0)251 8336523; E-mail: studer@uni-muenster.de*

#### **Table of contents**

|                                                                              |     |
|------------------------------------------------------------------------------|-----|
| General                                                                      | S2  |
| Synthesis of $\beta$ -aryl- $\alpha$ -isocyano-acrylates                     | S3  |
| General procedure for the preparation of 1-trifluoromethylated isoquinolines | S7  |
| Physical data of the compounds                                               | S7  |
| Lager scale experiment                                                       | S19 |
| The reduction of <b>1a</b>                                                   | S20 |
| Mechanistic study                                                            | S21 |
| References                                                                   | S22 |
| NMR spectra                                                                  | S23 |

## ***General***

All manipulations were conducted with a standard *Schlenk* tube under Ar. All solvents and chemicals were used as received from the suppliers (*Alfa, Acros, Aldrich, ABCR, Fluka*).

Solvents for flash column chromatography (FC) and extractions have been distilled once. FC was performed using silica gel 60 (40-63 $\mu$ m, *Merck*). Thin layer chromatography (TLC) was performed using silica gel 60 F<sub>254</sub> plates from *Merck*.

<sup>1</sup>H NMR spectra were recorded on a *Bruker DPX-300* spectrometer or *AV-400* spectrometer at room temperature. Chemical shifts (in ppm) were referenced to tetramethylsilane ( $\delta = 0$  ppm) in CDCl<sub>3</sub> as an internal standard. <sup>13</sup>C NMR spectra were obtained by the same NMR spectrometer and were calibrated with CDCl<sub>3</sub> ( $\delta = 77.00$  ppm). <sup>19</sup>F NMR spectra were obtained by the same NMR spectrometer and using CFC<sub>3</sub> as external standard. Data for <sup>1</sup>H NMR are reported as follows: chemical shifts ( $\delta$  ppm), multiplicity (s = singlet, d = doublet, t = triplet, q = quartet, m = multiplet, br = broad), coupling constant (Hz), integration and assignment. Data for <sup>13</sup>C NMR are reported in terms of chemical shift and multiplicity where appropriate. IR-spectra were recorded on a *Digilab Excalibur FTS 4000* device equipped with a *MKII Golden Gate Single Reflection ATR System*. Mass spectra were performed on a *Bruker Daltonics MicroTof*, a *Waters-Micromass Quattro LCZ* or an *Orbitrap LTQ XL* for ESI-MS and HRMS.

## Synthesis of vinyl isonitriles:

All  $\beta$ -aryl- $\alpha$ -isocyano-acrylates were prepared according to reported methods.<sup>1,2</sup>

A typical procedure (synthesis of **1d**) is shown below:

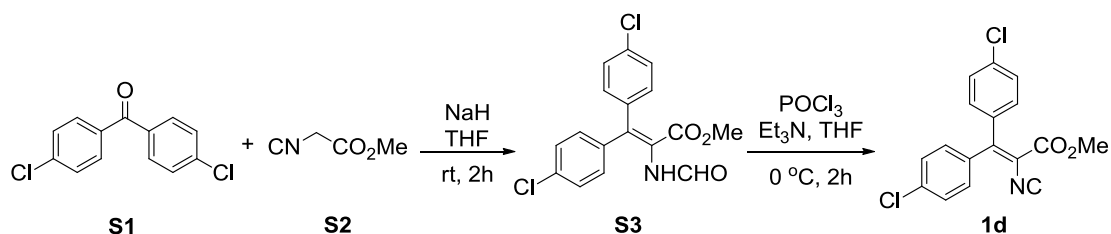

### Methyl 3,3-bis(4-chlorophenyl)-2-isocyanoacrylate (**1d**)

A mixture of bis(4-chlorophenyl)methanone **S1** (2.51 g, 10.0 mmol) and methyl isocyanoacetate **S2** (0.99 g, 10.0 mmol) in THF (10.0 mL) was added dropwise to a suspension of NaH (60% in oil) (0.48 g, 12.0 mmol) in THF (10.0 mL) at room temperature and the mixture was stirred for 2 h at room temperature. 10% AcOH was added to the mixture at 0 °C until there is no hydrogen release. The solvent was removed under reduced pressure and the residue was extracted with CH<sub>2</sub>Cl<sub>2</sub> three times. The combined organic layer was dried over anhydrous MgSO<sub>4</sub>. The solvent was removed under reduced pressure and the crude product was purified by flash column chromatography on silica gel by using a 1:1 mixture of pentane/EtOAc as an eluent to provide analytical pure product **S3** as a white solid (2.44 g, 70%);

A THF solution (10.0 mL) of **S3** (1.75 g, 5.0 mmol) and NEt<sub>3</sub> (5.6 mL, 40 mmol) was cooled to 0 °C. Then, POCl<sub>3</sub> (0.93 mL, 10.0 mmol) was added dropwise and the mixture was stirred at 0 °C for 2 h. After the reaction was completed, the mixture was quenched by aqueous saturated Na<sub>2</sub>CO<sub>3</sub> solution and stirred for 1 h. The mixture was extracted with CH<sub>2</sub>Cl<sub>2</sub> three times. The combined organic layer was dried over anhydrous MgSO<sub>4</sub>. The solvent was removed under reduced pressure and the crude product was purified by flash column chromatography on silica gel by using a 10:1 mixture of pentane/EtO<sub>2</sub> as an eluent to provide analytical pure product **1d** as yellow solid (1.49 g, 90% yield). <sup>1</sup>H NMR (400 MHz, CDCl<sub>3</sub>)  $\delta$  7.49-7.46 (m, 2H, Ar-H), 7.44-7.41 (m, 2H, Ar-H), 7.15-7.12 (m, 2H, Ar-H), 6.93-6.90 (m, 2H, Ar-H), 3.64 (s, 3H, CH<sub>3</sub>); <sup>13</sup>C NMR (100 MHz, CDCl<sub>3</sub>)  $\delta$  171.0 (C), 161.2 (C), 152.1 (C), 136.0 (C), 135.7 (C), 131.9 (2 $\times$ CH), 131.6 (2 $\times$ CH), 131.4 (2 $\times$ CH), 130.6 (2 $\times$ CH), 125.2 (C), 124.4 (C), 114.0 (C), 53.1 (CH<sub>3</sub>); IR (neat): 2952, 2113, 1731, 1585, 1468, 1435, 1396, 1324, 1255, 1117, 1072, 1011, 914, 823, 731; HRMS (ESI) calculated for

C<sub>17</sub>H<sub>11</sub>Cl<sub>2</sub>NO<sub>2</sub>Na [M+Na]<sup>+</sup> m/z 354.0059, found 354.0060.

**Methyl 3,3-bis(4-bromophenyl)-2-isocyanoacrylate (1e)**

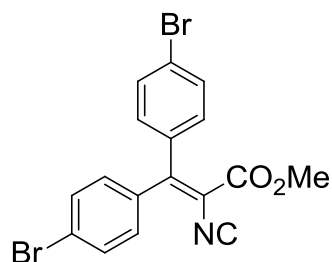

This compound was prepared via the same procedure described for **1d**, except that bis(4-bromophenyl)methanone was used in place of bis(4-chlorophenyl)methanone. **1e** was obtained in 60% yield over two steps as yellow solid. <sup>1</sup>H NMR (400 MHz, CDCl<sub>3</sub>) δ 7.33-7.30 (m, 2H, Ar-H), 7.29-7.25 (m, 2H, Ar-H), 7.22-7.19 (m, 2H, Ar-H), 7.00-6.97 (m, 2H, Ar-H), 3.64 (s, 3H, CH<sub>3</sub>); <sup>13</sup>C NMR (100 MHz, CDCl<sub>3</sub>) δ 170.9 (C), 161.7 (C), 152.0 (C), 136.7 (C), 136.1 (C), 135.6 (C), 135.3 (C), 131.2 (2×CH), 130.5 (2×CH), 128.9 (2×CH), 128.7 (2×CH), 114.1 (C), 53.1 (CH<sub>3</sub>); IR (neat): 2952, 2113, 1730, 1589, 1489, 1435, 1400, 1324, 1253, 1116, 1090, 1014, 913, 826, 731; HRMS (ESI) calculated for C<sub>17</sub>H<sub>11</sub>Br<sub>2</sub>NO<sub>2</sub>Na [M+Na]<sup>+</sup> m/z 441.9049, found 441.9037.

**(E)-Methyl 3-(4-bromophenyl)-2-isocyano-3-phenylacrylate (1g)**

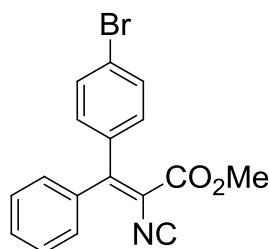

This compound was prepared via the same procedure described for **1d**, except that (4-bromophenyl)(phenyl)methanone was used in place of bis(4-chlorophenyl)methanone. **1g** was obtained in 43% yield over two steps as yellow solid. <sup>1</sup>H NMR (300 MHz, CDCl<sub>3</sub>) δ 7.43-7.39 (m, 2H, Ar-H), 7.34-7.30 (m, 3H, Ar-H), 7.26-7.23 (m, 2H, Ar-H), 6.95-6.90 (m, 2H, Ar-H), 3.63 (s, 3H, CH<sub>3</sub>); <sup>13</sup>C NMR (75 MHz, CDCl<sub>3</sub>) δ 170.6 (C), 161.8 (C), 153.4 (C), 136.9 (C), 136.6 (C), 131.5 (2×CH), 130.6 (2×CH), 130.4 (CH), 129.7 (2×CH), 128.5 (2×CH), 124.0 (C), 114.0 (C), 52.9 (CH<sub>3</sub>); IR (neat): 2952, 2112, 1729, 1585, 1484, 1435, 1327, 1252, 1115, 1071, 1010, 909, 822, 731, 698; HRMS (ESI) calculated for C<sub>17</sub>H<sub>12</sub>NO<sub>2</sub>BrNa [M+Na]<sup>+</sup> m/z 363.9944, found 363.9951.

### (Z)-Methyl 2-isocyano-3-(p-tolyl)but-2-enoate (**1i**)

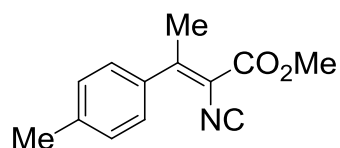

This compound was prepared via the same procedure described for **1d**, except that 1-(p-tolyl)ethanone was used in place of bis(4-chlorophenyl)methanone. **1i** was obtained in 47% yield over two steps as yellow oil. **<sup>1</sup>H NMR** (400 MHz, CDCl<sub>3</sub>) δ 7.20 (d, *J* = 8.2 Hz, 2H, Ar-*H*), 7.15 (d, *J* = 8.2 Hz, 2H, Ar-*H*), 3.79 (s, 3H, CH<sub>3</sub>), 2.46 (s, 3H, CH<sub>3</sub>), 2.29 (s, 3H, CH<sub>3</sub>); **<sup>13</sup>C NMR** (100 MHz, CDCl<sub>3</sub>) δ 167.9 (C), 161.8 (C), 156.1 (C), 139.6 (C), 136.3 (C), 129.1 (2×CH), 127.0 (2×CH), 114.0 (C), 52.7 (CH<sub>3</sub>), 21.5 (CH<sub>3</sub>), 21.2 (CH<sub>3</sub>); **IR** (neat): 2954, 2114, 1727, 1602, 1511, 1435, 1254, 1122, 1072, 1052, 817; **HRMS** (ESI) calculated for C<sub>13</sub>H<sub>13</sub>NO<sub>2</sub>Na [M+Na]<sup>+</sup> *m/z* 238.0838, found 238.0853.

### (Z)-Methyl 2-isocyano-3-phenylhex-2-enoate (**1j**)

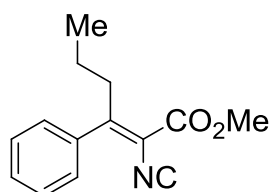

This compound was prepared via the same procedure described for **1d**, except that 1-phenylbutan-1-one was used in place of bis(4-chlorophenyl)methanone. **1j** was obtained in 45% yield over two steps as yellow oil. **<sup>1</sup>H NMR** (300 MHz, CDCl<sub>3</sub>) δ 7.38-7.30 (m, 3H, Ar-*H*), 7.23-7.17 (m, 2H, Ar-*H*), 3.79 (s, 3H, CH<sub>3</sub>), 2.89-2.84 (m, 2H, CH<sub>2</sub>), 1.38-1.26 (m, 2H, CH<sub>2</sub>), 0.82 (t, *J* = 7.4 Hz, 3H, CH<sub>3</sub>); **<sup>13</sup>C NMR** (75 MHz, CDCl<sub>3</sub>) δ 168.1 (C), 161.5 (C), 160.5 (C), 138.2 (C), 129.1 (CH), 128.5 (2×CH), 127.0 (2×CH), 114.7 (C), 52.7 (CH<sub>3</sub>), 35.9 (CH<sub>2</sub>), 21.4 (CH<sub>2</sub>), 13.7 (CH<sub>3</sub>); **IR** (neat): 2960, 2115, 1729, 1597, 1436, 1255, 1130, 1090, 770, 701; **HRMS** (ESI) calculated for C<sub>14</sub>H<sub>15</sub>NO<sub>2</sub>Na [M+Na]<sup>+</sup> *m/z* 252.0995, found 252.0991.

### Ethyl 2-isocyano-3,3-diphenylacrylate (**1n**)

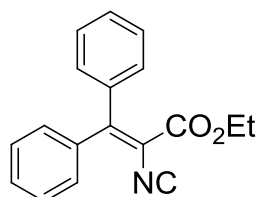

This compound was prepared via the same procedure described for **1d**, except that ethyl 2-cyanoacetate was used in place of isocynoacetate. **1n** was obtained in 68% yield over two steps as yellow oil. **<sup>1</sup>H NMR** (300 MHz, CDCl<sub>3</sub>) δ 7.21-7.11 (m, 8H, Ar-*H*), 6.95-6.91 (m, 2H, Ar-*H*), 3.90 (q, *J* = 7.1 Hz, 2H, Ar-*H*), 0.85 (t, *J* = 7.1 Hz, 3H, Ar-*H*); **<sup>13</sup>C NMR** (75 MHz, CDCl<sub>3</sub>) δ 169.7 (C), 161.9 (C), 153.7 (C), 138.0 (C), 137.3 (C), 130.1 (CH), 129.8 (2×CH), 129.4 (CH), 129.0 (2×CH), 128.4 (2×CH), 128.1 (2×CH), 114.3 (C), 62.1 (CH<sub>2</sub>), 13.5 (CH<sub>3</sub>); **IR** (neat): 3058, 2983, 2111, 1724, 1590, 1491, 1445, 1368, 1251, 1111, 1016, 763, 698; **HRMS** (ESI) calculated for C<sub>18</sub>H<sub>15</sub>NO<sub>2</sub>Na [M+Na]<sup>+</sup> *m/z* 300.0995, found 300.0991.

***tert*-Butyl 2-isocyano-3,3-diphenylacrylate (1o)**

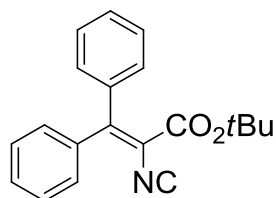

This compound was prepared via the same procedure described for **1d**, except that *tert*-butyl 2-cyanoacetate was used in place of isocynoacetate. **1o** was obtained in 70% yield over two steps as yellow solid. **<sup>1</sup>H NMR** (300 MHz, CDCl<sub>3</sub>) δ 7.42-7.32 (m, 8H, Ar-*H*), 7.16-7.13 (m, 2H, Ar-*H*), 1.28 (s, 9H, 3×CH<sub>3</sub>); **<sup>13</sup>C NMR** (75 MHz, CDCl<sub>3</sub>) δ 169.3 (C), 160.9 (C), 152.0 (C), 138.4 (C), 137.5 (C), 129.9 (CH), 129.8 (2×CH), 129.2 (3×CH), 128.3 (2×CH), 128.2 (2×CH), 116.0 (C), 83.4 (C), 27.4 (3×CH<sub>3</sub>); **IR** (neat): 3059, 2981, 2112, 1721, 1590, 1491, 1332, 1277, 1163, 1118, 842, 753, 698; **HRMS** (ESI) calculated for C<sub>20</sub>H<sub>19</sub>NO<sub>2</sub>Na [M+Na]<sup>+</sup> *m/z* 328.1308, found 328.1305.

## ***General procedure for the preparation of 1-trifluoromethylated isoquinolines:***

### ***Method A:***

$\beta$ -Aryl- $\alpha$ -isocyano-acrylate **1** (0.2 mmol, 1.0 equiv), *Togni*-reagent **2**<sup>3</sup> (0.3 mmol, 1.5 equiv), and Bu<sub>4</sub>NI (0.01 mmol, 0.05 equiv) were placed in a dry *Schlenk* tube under argon. Dry 1,4-dioxane (1.0 mL) was added and the reaction mixture was stirred at 80 °C for 3 h and the reaction was monitored by TLC. The crude reaction mixture was purified by flash column chromatography on silica gel to afford the product.

### ***Method B:***

$\beta$ -Aryl- $\alpha$ -isocyano-acrylate **1** (0.2 mmol, 1.0 equiv), *Togni*-reagent **2** (0.4 mmol, 2.0 equiv), and Bu<sub>4</sub>NI (0.01 mmol, 0.05 equiv) were placed in a dry *Schlenk* tube under argon. Dry 1,4-dioxane (1.0 mL) was added and the reaction mixture was stirred at 80 °C for 6 h and the reaction was monitored by TLC. The crude reaction mixture was purified by flash column chromatography on silica gel to afford the product.

## ***Physical data of the compounds***

### **Methyl 4-phenyl-1-(trifluoromethyl)isoquinoline-3-carboxylate (**3a**)**

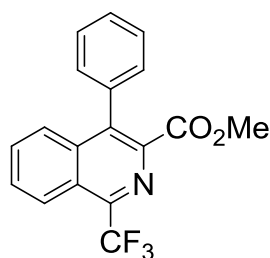

According to **method A** with methyl 2-isocyano-3,3-diphenylacrylate **1a** (53.4 mg, 0.20 mmol, 1.0 equiv), *Togni*-reagent **2** (95.6 mg, 0.30 mmol, 1.5 equiv) and Bu<sub>4</sub>NI (3.8 mg, 10  $\mu$ mol, 0.05 equiv). The crude reaction mixture was purified by flash silica gel column chromatography (pentane/diethyl ether = 10/1) to afford the desired product **3a** as white solid (52.5 mg, 80%). <sup>1</sup>H NMR (400 MHz, CDCl<sub>3</sub>)  $\delta$  8.34-8.31 (m, 1H, Ar-H), 7.75-7.70 (m, 1H, Ar-H), 7.67-7.66 (m, 2H, Ar-H), 7.46-7.42 (m, 3H, Ar-H), 7.27-7.25 (m, 2H, Ar-H), 3.63 (s, 3H, CH<sub>3</sub>); <sup>13</sup>C NMR (100 MHz, CDCl<sub>3</sub>)  $\delta$  166.4 (C), 145.6 (q, *J* = 33.8 Hz, C), 140.0 (C), 137.5 (C), 137.1 (C), 134.9 (C), 131.4

(CH), 129.9 (CH), 129.4 (CH), 128.5 (CH), 128.4 (CH), 127.4 (CH), 125.0 (C), 124.7 (q,  $J = 3.1$  Hz, CH), 121.8 (q,  $J = 275.0$  Hz,  $CF_3$ ), 52.6 ( $CH_3$ );  $^{19}F$  NMR (282 MHz,  $CDCl_3$ )  $\delta$  -62.77 (s, 3F,  $CF_3$ ); IR (neat): 2953, 1738, 1440, 1401, 1240, 1179, 1126, 1003, 771, 701  $cm^{-1}$ ; HRMS (ESI) calculated for  $C_{18}H_{12}NO_2F_3Na$   $[M+Na]^+$   $m/z$  354.0712, found 354.0708.

### Methyl 7-methyl-4-(*p*-tolyl)-1-(trifluoromethyl)isoquinoline-3-carboxylate (**3b**)

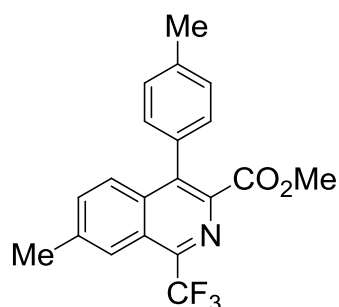

According to **method A** with methyl 2-isocyano-3,3-di-*p*-tolylacrylate **1b** (58.9 mg, 0.20 mmol, 1.0 equiv), *Togni*-reagent **2** (95.7 mg, 0.30 mmol, 1.5 equiv) and  $Bu_4NI$  (3.7 mg, 10  $\mu$ mol, 0.05 equiv). The crude reaction mixture was purified by flash silica gel column chromatography (pentane/diethyl ether = 10/1) to afford the desired product **3b** as pale yellow solid (52.1 mg, 73%).  $^1H$  NMR (300 MHz,  $CDCl_3$ )  $\delta$  8.05 (s, 1H, Ar-*H*), 7.58 (d,  $J = 9.0$  Hz, 1H, Ar-*H*), 7.47 (dd,  $J = 8.9, 1.4$  Hz, 1H, Ar-*H*), 7.24 (d,  $J = 7.8$  Hz, 2H, Ar-*H*), 7.13 (d,  $J = 8.1$  Hz, 2H, Ar-*H*), 3.66 (s, 3H,  $CH_3$ ), 2.53 (s, 3H,  $CH_3$ ), 2.38 (s, 3H,  $CH_3$ );  $^{13}C$  NMR (75 MHz,  $CDCl_3$ )  $\delta$  166.6 (C), 144.6 (q,  $J = 33.7$  Hz, C), 140.5 (C), 139.2 (C), 138.2 (C), 137.7 (C), 135.5 (C), 133.6 (CH), 132.1 (C), 129.2 (CH), 129.1 (CH), 127.3 (CH), 125.3 (C), 123.4 (q,  $J = 3.0$  Hz, CH), 121.9 (q,  $J = 274.9$  Hz,  $CF_3$ ), 52.6 ( $CH_3$ ), 22.2 ( $CH_3$ ), 21.4 ( $CH_3$ );  $^{19}F$  NMR (282 MHz,  $CDCl_3$ )  $\delta$  -62.83 (s, 3F,  $CF_3$ ); IR (neat): 2952, 1737, 1439, 1397, 1236, 1176, 1118, 1010, 976, 818, 757, 696  $cm^{-1}$ ; HRMS (ESI) calculated for  $C_{20}H_{16}NO_2F_3Na$   $[M+Na]^+$   $m/z$  382.1025, found 382.1029.



**Methyl 7-methoxy-4-(4-methoxyphenyl)-1-(trifluoromethyl)isoquinoline-3-carboxylate (3c)**

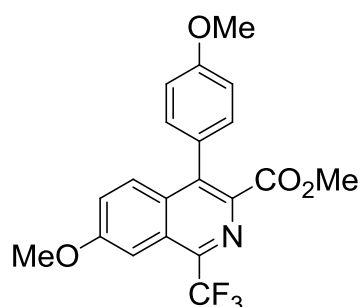

According to **method A** with methyl 2-isocyano-3,3-bis(4-methoxyphenyl)acrylate **1c** (65.5 mg, 0.20 mmol, 1.0 equiv), *Togni*-reagent **2** (95.5 mg, 0.30 mmol, 1.5 equiv) and Bu<sub>4</sub>NI (3.8 mg, 10 μmol, 0.05 equiv). The crude reaction mixture was purified by flash silica gel column chromatography (pentane/diethyl ether = 5/1) to afford the desired product **3c** as white solid (52.1 mg, 67%). **<sup>1</sup>H NMR** (400 MHz, CDCl<sub>3</sub>) δ 7.61 (d, *J* = 9.6 Hz, 1H, Ar-*H*), 7.52-7.48 (m, 1H, Ar-*H*), 7.29 (dd, *J* = 9.6, 2.4 Hz, 1H, Ar-*H*), 7.19-7.15 (m, 2H, Ar-*H*), 6.98-6.95 (m, 2H, Ar-*H*), 3.93 (s, 3H, CH<sub>3</sub>), 3.82 (s, 3H, CH<sub>3</sub>), 3.67 (s, 3H, CH<sub>3</sub>); **<sup>13</sup>C NMR** (100 MHz, CDCl<sub>3</sub>) δ 166.7 (C), 160.2 (C), 159.7 (C), 143.4 (q, *J* = 33.5 Hz, C), 138.4 (C), 137.6 (C), 132.9 (C), 130.6 (CH), 129.1 (CH), 127.2 (C), 126.9 (C), 124.3 (CH), 122.0 (q, *J* = 274.7 Hz, CF<sub>3</sub>), 113.8 (CH), 102.3 (q, *J* = 3.1 Hz, CH), 55.6 (CH<sub>3</sub>), 55.3 (CH<sub>3</sub>), 52.6 (CH<sub>3</sub>); **<sup>19</sup>F NMR** (282 MHz, CDCl<sub>3</sub>) δ -63.59 (s, 3F, CF<sub>3</sub>); **IR** (neat): 2952, 1734, 1613, 1517, 1418, 1290, 1229, 1173, 1119, 1030, 837 cm<sup>-1</sup>; **HRMS** (ESI) calculated for C<sub>20</sub>H<sub>16</sub>NO<sub>4</sub>F<sub>3</sub>Na [M+Na]<sup>+</sup> *m/z* 414.0924, found 414.0918.

**Methyl 7-chloro-4-(4-chlorophenyl)-1-(trifluoromethyl)isoquinoline-3-carboxylate (3d)**

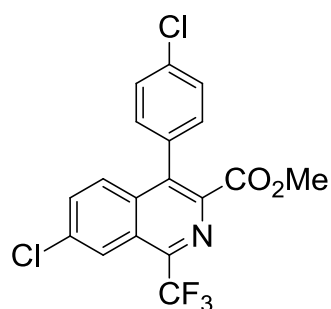

According to **method A** with methyl 3,3-bis(4-chlorophenyl)-2-isocyanoacrylate **1d** (66.9 mg, 0.20 mmol, 1.0 equiv), *Togni*-reagent **2** (95.6 mg, 0.30 mmol, 1.5 equiv)

and Bu<sub>4</sub>NI (3.8 mg, 10 μmol, 0.05 equiv). The crude reaction mixture was purified by flash silica gel column chromatography (pentane/diethyl ether = 10/1) to afford the desired product **3d** as pale yellow solid (57.5 mg, 72%). <sup>1</sup>H NMR (300 MHz, CDCl<sub>3</sub>) δ 8.29-8.28 (m, 1H, Ar-H), 7.63 (dd, *J* = 9.2, 2.0 Hz, 1H, Ar-H), 7.57 (d, *J* = 9.0 Hz, 1H, Ar-H), 7.46-7.42 (m, 2H, Ar-H), 7.21-7.17 (m, 2H, Ar-H), 3.69 (s, 3H, CH<sub>3</sub>); <sup>13</sup>C NMR (75 MHz, CDCl<sub>3</sub>) δ 165.8 (C), 145.0 (q, *J* = 34.3 Hz, C), 140.1 (C), 136.7 (C), 136.4 (C), 135.4 (C), 135.0 (C), 132.9 (C), 132.8 (CH), 130.7 (CH), 128.9 (CH), 128.8 (CH), 125.5 (C), 123.8 (q, *J* = 3.4 Hz, CH), 121.4 (q, *J* = 275.0 Hz, CF<sub>3</sub>), 52.8 (CH<sub>3</sub>); <sup>19</sup>F NMR (282 MHz, CDCl<sub>3</sub>) δ -63.00 (s, 3F, CF<sub>3</sub>); IR (neat): 2954, 1737, 1497, 1440, 1393, 1238, 1178, 1127, 1009, 978, 838 cm<sup>-1</sup>; HRMS (ESI) calculated for C<sub>18</sub>H<sub>10</sub>NO<sub>2</sub>Cl<sub>2</sub>F<sub>3</sub>Na [M+Na]<sup>+</sup> *m/z* 421.9933, found 421.9935.

**Methyl 7-bromo-4-(4-bromophenyl)-1-(trifluoromethyl)isoquinoline-3-carboxylate (3e)**

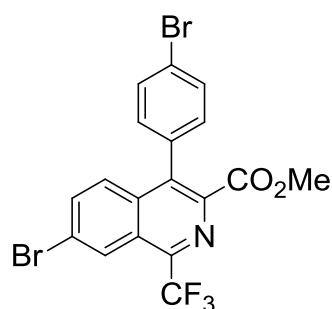

According to **method A** with methyl 3,3-bis(4-bromophenyl)-2-isocyanoacrylate **1e** (84.8 mg, 0.20 mmol, 1.0 equiv), *Togni*-reagent **2** (95.5 mg, 0.30 mmol, 1.5 equiv) and Bu<sub>4</sub>NI (3.7 mg, 10 μmol, 0.05 equiv). The crude reaction mixture was purified by flash silica gel column chromatography (pentane/diethyl ether = 10/1) to afford the desired product **3e** as pale yellow solid (72.1 mg, 74%). <sup>1</sup>H NMR (300 MHz, CDCl<sub>3</sub>) δ 8.47-8.46 (m, 1H, Ar-H), 7.76 (dd, *J* = 9.0, 1.8 Hz, 1H, Ar-H), 7.62-7.58 (m, 2H, Ar-H), 7.49 (d, *J* = 9.3 Hz, 1H, Ar-H), 7.15-7.10 (m, 2H, Ar-H), 3.70 (s, 3H, CH<sub>3</sub>); <sup>13</sup>C NMR (75 MHz, CDCl<sub>3</sub>) δ 165.8 (C), 144.9 (q, *J* = 34.3 Hz, C), 140.0 (C), 136.5 (C), 135.5 (C), 135.3 (CH), 133.3 (C), 131.8 (CH), 130.9 (CH), 128.7 (CH), 127.1 (q, *J* = 3.3 Hz, CH), 125.8 (C), 125.2 (C), 123.2 (C), 121.4 (q, *J* = 275.3 Hz, CF<sub>3</sub>), 52.9 (CH<sub>3</sub>); <sup>19</sup>F NMR (282 MHz, CDCl<sub>3</sub>) δ -62.90 (s, 3F, CF<sub>3</sub>); IR (neat): 2952, 1735, 1492, 1440, 1389, 1236, 1177, 1123, 1079, 1006, 976, 826 cm<sup>-1</sup>; HRMS (ESI) calculated for C<sub>18</sub>H<sub>10</sub>NO<sub>2</sub>Br<sub>2</sub>F<sub>3</sub>Na [M+Na]<sup>+</sup> *m/z* 511.8903, found 511.8904.

### Methyl 4-(4-chlorophenyl)-1-(trifluoromethyl)isoquinoline-3-carboxylate (**3f**)

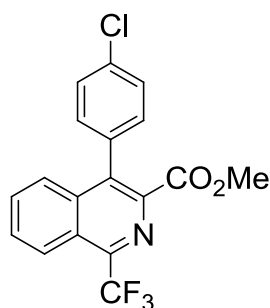

According to **method A** with (*E*)-methyl 3-(4-chlorophenyl)-2-isocyano-3-phenylacrylate **1f** (60.1 mg, 0.20 mmol, 1.0 equiv), *Togni*-reagent **2** (95.4 mg, 0.30 mmol, 1.5 equiv) and Bu<sub>4</sub>NI (3.8 mg, 10 μmol, 0.05 equiv). The crude reaction mixture was purified by flash silica gel column chromatography (pentane/diethyl ether = 10/1) to afford the desired product **3f** as white solid (47.3 mg, 65%). <sup>1</sup>H NMR (300 MHz, CDCl<sub>3</sub>) δ 8.36-8.33 (m, 1H, Ar-*H*), 7.78-7.60 (m, 3H, Ar-*H*), 7.44 (dt, *J* = 8.9, 2.2 Hz, 2H, Ar-*H*), 7.21 (dt, *J* = 8.9, 2.2 Hz, 2H, Ar-*H*), 3.69 (s, 3H, CH<sub>3</sub>); <sup>13</sup>C NMR (75 MHz, CDCl<sub>3</sub>) δ 166.2 (C), 146.0 (q, *J* = 34.2 Hz, C), 139.9 (C), 137.0 (C), 136.4 (C), 134.8 (C), 133.5 (C), 131.7 (CH), 130.8 (CH), 130.1 (CH), 128.7 (CH), 127.1 (CH), 125.0 (C), 124.8 (q, *J* = 3.2 Hz, CH), 121.7 (q, *J* = 275.0 Hz, CF<sub>3</sub>), 52.7 (CH<sub>3</sub>); <sup>19</sup>F NMR (282 MHz, CDCl<sub>3</sub>) δ -62.83 (s, 3F, CF<sub>3</sub>); IR (neat): 2954, 1734, 1491, 1438, 1400, 1239, 1178, 1125, 1002, 830, 772, 681 cm<sup>-1</sup>; HRMS (ESI) calculated for C<sub>18</sub>H<sub>11</sub>NO<sub>2</sub>ClF<sub>3</sub>Na [M+Na]<sup>+</sup> *m/z* 388.0323, found 388.0329.

### Methyl 4-(4-bromophenyl)-1-(trifluoromethyl)isoquinoline-3-carboxylate (**3g**)

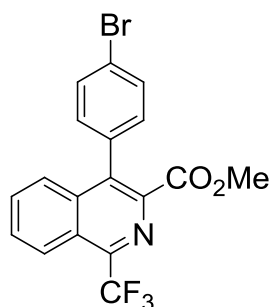

According to **method A** with (*E*)-methyl 3-(4-bromophenyl)-2-isocyano-3-phenylacrylate **1g** (68.9 mg, 0.20 mmol, 1.0 equiv), *Togni*-reagent **2** (95.6 mg, 0.30 mmol, 1.5 equiv) and Bu<sub>4</sub>NI (3.9 mg, 11 μmol, 0.05 equiv). The crude reaction mixture was purified by flash silica gel column chromatography (pentane/diethyl ether = 10/1) to afford the desired product **3g** as

white solid (62.9 mg, 77%).  $^1\text{H NMR}$  (300 MHz,  $\text{CDCl}_3$ )  $\delta$  8.33 (d,  $J = 8.1$  Hz, 1H, Ar-*H*), 7.77-7.63 (m, 3H, Ar-*H*), 7.58 (dt,  $J = 8.3$  Hz, 2H, Ar-*H*), 7.14 (d,  $J = 8.3$  Hz, 2H, Ar-*H*), 3.68 (s, 3H,  $\text{CH}_3$ );  $^{13}\text{C NMR}$  (75 MHz,  $\text{CDCl}_3$ )  $\delta$  166.1 (C), 146.0 (q,  $J = 33.8$  Hz, C), 139.8 (C), 136.9 (C), 136.4 (C), 134.0 (C), 131.7 (CH), 131.1 (CH), 130.1 (CH), 127.1 (CH), 125.0 (C), 124.8 (q,  $J = 3.1$  Hz, CH), 122.9 (C), 121.7 (q,  $J = 275.0$  Hz,  $\text{CF}_3$ ), 52.7 ( $\text{CH}_3$ );  $^{19}\text{F NMR}$  (282 MHz,  $\text{CDCl}_3$ )  $\delta$  -62.82 (s, 3F,  $\text{CF}_3$ ); **IR** (neat): 2954, 1731, 1487, 1439, 1389, 1240, 1179, 1130, 1071, 1002, 733  $\text{cm}^{-1}$ ; **HRMS** (ESI) calculated for  $\text{C}_{18}\text{H}_{11}\text{NO}_2\text{BrF}_3\text{Na}$   $[\text{M}+\text{Na}]^+$   $m/z$  431.9817, found 431.9811.

### Methyl 4-methyl-1-(trifluoromethyl)isoquinoline-3-carboxylate (**3h**)

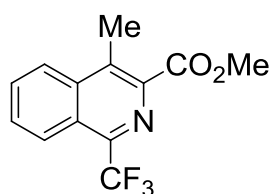

According to **method A** with (*Z*)-methyl 2-isocyano-3-phenylbut-2-enoate **1h** (40.7 mg, 0.20 mmol, 1.0 equiv), *Togni*-reagent **2** (95.3 mg, 0.30 mmol, 1.5 equiv) and  $\text{Bu}_4\text{NI}$  (3.8 mg, 10  $\mu\text{mol}$ , 0.05 equiv). The crude reaction mixture was purified by flash silica gel column chromatography (pentane/diethyl ether = 10/1) to afford the desired product **3h** as white solid (37.6 mg, 70%).  $^1\text{H NMR}$  (300 MHz,  $\text{CDCl}_3$ )  $\delta$  8.28-8.25 (m, 1H, Ar-*H*), 8.17 (d,  $J = 8.4$  Hz, 1H, Ar-*H*), 7.83-7.77 (m, 1H, Ar-*H*), 7.75-7.70 (m, 1H, Ar-*H*), 3.97 (s, 3H,  $\text{CH}_3$ ), 2.85 (s, 3H,  $\text{CH}_3$ );  $^{13}\text{C NMR}$  (75 MHz,  $\text{CDCl}_3$ )  $\delta$  166.9 (C), 144.2 (q,  $J = 33.6$  Hz, C), 139.7 (C), 137.2 (C), 133.9 (C), 131.3 (CH), 129.7 (CH), 125.1 (q,  $J = 3.1$  Hz, CH), 125.0 (CH), 124.6 (C), 121.8 (q,  $J = 274.8$  Hz,  $\text{CF}_3$ ), 52.9 ( $\text{CH}_3$ ), 14.7 ( $\text{CH}_3$ );  $^{19}\text{F NMR}$  (282 MHz,  $\text{CDCl}_3$ )  $\delta$  -62.69 (s, 3F,  $\text{CF}_3$ ); **IR** (neat): 2956, 1726, 1440, 1376, 1297, 1231, 1194, 1122, 1062, 969, 764  $\text{cm}^{-1}$ ; **HRMS** (ESI) calculated for  $\text{C}_{13}\text{H}_{10}\text{NO}_2\text{F}_3\text{Na}$   $[\text{M}+\text{Na}]^+$   $m/z$  292.0556, found 292.0557.

### Methyl 4,7-dimethyl-1-(trifluoromethyl)isoquinoline-3-carboxylate (**3i**)

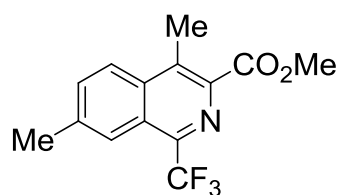

According to **method A** with (*Z*)-methyl 2-isocyano-3-(*p*-tolyl)but-2-enoate **1i** (43.8

mg, 0.20 mmol, 1.0 equiv), *Togni*-reagent **2** (95.2 mg, 0.30 mmol, 1.5 equiv) and Bu<sub>4</sub>Ni (3.8 mg, 10 μmol, 0.05 equiv). The crude reaction mixture was purified by flash silica gel column chromatography (pentane/diethyl ether = 10/1) to afford the desired product **3i** as white solid (39.6 mg, 70%). <sup>1</sup>H NMR (400 MHz, CDCl<sub>3</sub>) δ 8.06 (d, *J* = 8.8 Hz, 1H, Ar-*H*), 8.00 (brs, 1H, Ar-*H*), 7.62 (dd, *J* = 8.8, 1.6 Hz, 1H, Ar-*H*), 3.96 (s, 3H, CH<sub>3</sub>), 2.84 (s, 3H, CH<sub>3</sub>), 2.54 (s, 3H, CH<sub>3</sub>); <sup>13</sup>C NMR (100 MHz, CDCl<sub>3</sub>) δ 167.0 (C), 143.4 (q, *J* = 33.4 Hz, C), 140.4 (C), 138.8 (C), 135.5 (C), 134.0 (C), 133.5 (CH), 124.9 (C), 124.8 (CH), 124.0 (q, *J* = 3.0 Hz, CH), 121.9 (q, *J* = 274.7 Hz, CF<sub>3</sub>), 52.8 (CH<sub>3</sub>), 22.1 (CH<sub>3</sub>), 14.7 (CH<sub>3</sub>); <sup>19</sup>F NMR (282 MHz, CDCl<sub>3</sub>) δ -62.75 (s, 3F, CF<sub>3</sub>); IR (neat): 2956, 1715, 1443, 1371, 1300, 1232, 1171, 1111, 1076, 980, 819 cm<sup>-1</sup>; HRMS (ESI) calculated for C<sub>14</sub>H<sub>12</sub>NO<sub>2</sub>F<sub>3</sub>Na [M+Na]<sup>+</sup> m/z 306.0712, found 306.0720.

### Methyl 4-propyl-1-(trifluoromethyl)isoquinoline-3-carboxylate (**3j**)

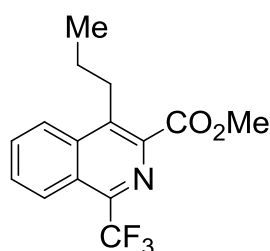

According to **method A** with (*Z*)-methyl 2-isocyano-3-phenylhex-2-enoate **1j** (49.1 mg, 0.20 mmol, 1.0 equiv), *Togni*-reagent **2** (95.3 mg, 0.30 mmol, 1.5 equiv) and Bu<sub>4</sub>Ni (3.9 mg, 11 μmol, 0.05 equiv). The crude reaction mixture was purified by flash silica gel column chromatography (pentane/diethyl ether = 10/1) to afford the desired product **3j** as white solid (45.8 mg, 77%). <sup>1</sup>H NMR (300 MHz, CDCl<sub>3</sub>) δ 8.28 (d, *J* = 8.7 Hz, 1H, Ar-*H*), 8.18 (d, *J* = 8.7 Hz, 1H, Ar-*H*), 7.82-7.77 (m, 1H, Ar-*H*), 7.74-7.69 (m, 1H, Ar-*H*), 3.96 (s, 3H, CH<sub>3</sub>), 3.28-3.22 (m, 2H, CH<sub>2</sub>), 1.75-1.67 (m, 2H, CH<sub>2</sub>), 1.03 (d, *J* = 7.4 Hz, 3H, CH<sub>3</sub>); <sup>13</sup>C NMR (75 MHz, CDCl<sub>3</sub>) δ 166.9 (C), 144.3 (q, *J* = 33.4 Hz, C), 139.7 (C), 138.1 (C), 136.7 (C), 131.2 (CH), 129.6 (CH), 125.3 (q, *J* = 3.2 Hz, CH), 125.1 (C), 125.0 (CH), 121.9 (q, *J* = 274.8 Hz, CF<sub>3</sub>), 52.8 (CH<sub>3</sub>), 30.3 (CH<sub>2</sub>), 24.5 (CH<sub>2</sub>), 14.4 (CH<sub>3</sub>); <sup>19</sup>F NMR (282 MHz, CDCl<sub>3</sub>) δ -62.72 (s, 3F, CF<sub>3</sub>); IR (neat): 2960, 2874, 1733, 1440, 1401, 1303, 1239, 1215, 1165, 1121, 1072, 968, 774, 685 cm<sup>-1</sup>; HRMS (ESI) calculated for C<sub>15</sub>H<sub>14</sub>NO<sub>2</sub>F<sub>3</sub>Na [M+Na]<sup>+</sup> m/z 320.0869, found 320.0864.

### Methyl 4-isopropyl-1-(trifluoromethyl)isoquinoline-3-carboxylate (**3k**)

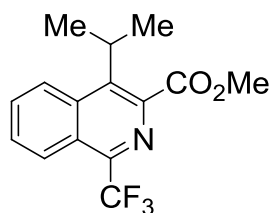

According to **method A** with (*Z*)-methyl 2-isocyano-4-methyl-3-phenylpent-2-enoate **1k** (46.6 mg, 0.20 mmol, 1.0 equiv), *Togni*-reagent **2** (95.4 mg, 0.30 mmol, 1.5 equiv) and Bu<sub>4</sub>NI (4.0 mg, 11 μmol, 0.05 equiv). The crude reaction mixture was purified by flash silica gel column chromatography (pentane/diethyl ether = 10/1) to afford the desired product **3k** as white solid (35.8 mg, 60%). <sup>1</sup>H NMR (300 MHz, CDCl<sub>3</sub>) δ 8.34 (d, *J* = 8.4 Hz, 1H, Ar-*H*), 8.28 (d, *J* = 8.4 Hz, 1H, Ar-*H*), 7.78-7.73 (m, 1H, Ar-*H*), 7.70-7.65 (m, 1H, Ar-*H*), 3.96 (s, 3H, CH<sub>3</sub>), 3.81-3.67 (m, 1H, CH), 1.51 (d, *J* = 7.5 Hz, 6H, 2×CH<sub>3</sub>); <sup>13</sup>C NMR (75 MHz, CDCl<sub>3</sub>) δ 168.3 (C), 144.5 (q, *J* = 33.1 Hz, C), 141.6 (C), 139.7 (C), 136.1 (C), 130.6 (CH), 128.9 (CH), 125.6 (q, *J* = 3.2 Hz, CH), 125.4 (CH), 125.2 (C), 121.9 (q, *J* = 274.8 Hz, CF<sub>3</sub>), 52.9 (CH<sub>3</sub>), 29.7 (CH), 21.9 (2×CH<sub>3</sub>); <sup>19</sup>F NMR (282 MHz, CDCl<sub>3</sub>) δ -62.61 (s, 3F, CF<sub>3</sub>); IR (neat): 2968, 1737, 1450, 1402, 1355, 1290, 1227, 1176 1127, 1031, 970, 770, 687 cm<sup>-1</sup>; HRMS (ESI) calculated for C<sub>15</sub>H<sub>14</sub>NO<sub>2</sub>F<sub>3</sub>Na [M+Na]<sup>+</sup> *m/z* 320.0869, found 320.0867.

### Methyl 4-cyclohexyl-1-(trifluoromethyl)isoquinoline-3-carboxylate (**3l**)

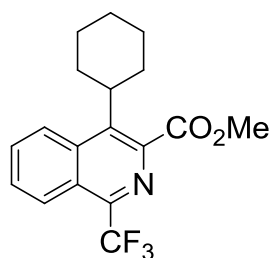

According to **method B** with (*Z*)-methyl 3-cyclohexyl-2-isocyano-3-phenylacrylate **1l** (54.6 mg, 0.20 mmol, 1.0 equiv), *Togni*-reagent **2** (95.7 mg, 0.30 mmol, 1.5 equiv) and Bu<sub>4</sub>NI (3.9 mg, 11 μmol, 0.05 equiv). The crude reaction mixture was purified by flash silica gel column chromatography (pentane/diethyl ether = 10/1) to afford the desired product **3l** as white solid (37.1 mg, 55%). <sup>1</sup>H NMR (400 MHz, CDCl<sub>3</sub>) δ 8.37 (brs, 1H, Ar-*H*), 8.25 (d, *J* = 8.8 Hz, 1H, Ar-*H*), 7.76-7.72 (m, 1H, Ar-*H*), 7.68-7.63 (m, 1H, Ar-*H*), 3.95 (s, 3H, CH<sub>3</sub>), 3.31-3.26 (m, 1H, CH), 1.97-1.75 (m, 7H, CH<sub>2</sub>), 1.44-1.28 (m, 3H, CH<sub>2</sub>); <sup>13</sup>C NMR (100 MHz, CDCl<sub>3</sub>) δ 168.5 (C), 144.3 (q, *J* = 33.6

Hz, C), 141.8 (C), 138.4 (C), 136.3 (C), 130.6 (CH), 128.8 (CH), 125.4 (q,  $J = 3.1$  Hz, CH), 125.1 (CH), 125.0 (C), 121.8 (q,  $J = 274.8$  Hz,  $CF_3$ ), 52.8 ( $CH_3$ ), 41.2 (C), 31.5 ( $2 \times CH_2$ ), 27.3 ( $2 \times CH_2$ ), 25.9 ( $CH_2$ );  $^{19}F$  NMR (282 MHz,  $CDCl_3$ )  $\delta$  -62.60 (s, 3F,  $CF_3$ ); IR (neat): 2931, 2856, 1736, 1449, 1401, 1370, 1218, 1121, 1078, 999, 972, 768, 685  $cm^{-1}$ ; HRMS (ESI) calculated for  $C_{18}H_{18}NO_2F_3Na$   $[M+Na]^+$   $m/z$  360.1182, found 360.1181.

### Methyl 7-methoxy-1-(trifluoromethyl)isoquinoline-3-carboxylate (3m)

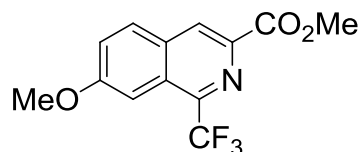

According to **method A** with (*Z*)-methyl 2-isocyano-3-(4-methoxyphenyl)acrylate **1m** (44.0 mg, 0.20 mmol, 1.0 equiv), *Togni*-reagent **2** (95.6 mg, 0.30 mmol, 1.5 equiv) and  $Bu_4NI$  (3.9 mg, 11  $\mu$ mol, 0.05 equiv). The crude reaction mixture was purified by flash silica gel column chromatography (pentane/DCM = 3/1-DCM) to afford the desired product **3m** as white solid (31.4 mg, 55%).  $^1H$  NMR (300 MHz,  $CDCl_3$ )  $\delta$  8.59 (s, 1H, Ar-*H*), 7.89 (d,  $J = 9.0$  Hz, 1H, Ar-*H*), 7.48 (s, 1H, Ar-*H*), 7.42 (dd,  $J = 9.0, 2.4$  Hz, 1H, Ar-*H*), 3.98 (s, 3H,  $CH_3$ ), 3.93 (s, 3H,  $CH_3$ );  $^{13}C$  NMR (75 MHz,  $CDCl_3$ )  $\delta$  165.4 (C), 161.3 (C), 144.7 (q,  $J = 33.7$  Hz, C), 138.0 (C), 132.7 (C), 130.5 (CH), 127.8 (C), 127.2 (CH), 124.9 (CH), 122.0 (q,  $J = 274.8$  Hz,  $CF_3$ ), 102.7 (q,  $J = 3.3$  Hz, CH), 55.7 ( $CH_3$ ), 52.9 ( $CH_3$ );  $^{19}F$  NMR (282 MHz,  $CDCl_3$ )  $\delta$  -63.82 (s, 3F,  $CF_3$ ); IR (neat): 3008, 2957, 1710, 1623, 1502, 1454, 1416, 1320, 1262, 1226, 1179, 1120, 1019, 825  $cm^{-1}$ ; HRMS (ESI) calculated for  $C_{13}H_{10}NO_3F_3Na$   $[M+Na]^+$   $m/z$  308.0505, found 308.0499.

### Ethyl 4-phenyl-1-(trifluoromethyl)isoquinoline-3-carboxylate (3n)

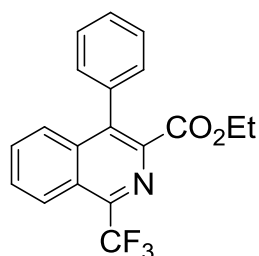

According to **method A** with ethyl 2-isocyano-3,3-diphenylacrylate **1n** (56.1 mg, 0.20 mmol, 1.0 equiv), *Togni*-reagent **2** (95.5 mg, 0.30 mmol, 1.5 equiv) and  $Bu_4NI$  (3.9 mg, 11  $\mu$ mol, 0.05 equiv). The crude reaction mixture was purified by flash silica gel

column chromatography (pentane/diethyl ether = 10/1) to afford the desired product **3n** as white solid (48.1 mg, 70%).  $^1\text{H NMR}$  (300 MHz,  $\text{CDCl}_3$ )  $\delta$  8.32 (d,  $J = 7.8$  Hz, 1H, Ar-*H*), 7.74-7.66 (m, 3H, Ar-*H*), 7.44-7.42 (m, 3H, Ar-*H*), 7.29-7.26 (m, 2H, Ar-*H*), 4.06 (q,  $J = 7.1$  Hz, 2H,  $\text{CH}_2$ ), 0.91 (t,  $J = 7.1$  Hz, 3H,  $\text{CH}_3$ );  $^{13}\text{C NMR}$  (75 MHz,  $\text{CDCl}_3$ )  $\delta$  166.3 (C), 145.7 (q,  $J = 33.7$  Hz, C), 140.9 (C), 137.0 (C), 136.7 (C), 135.1 (C), 131.4 (CH), 129.7 (CH), 129.6 (CH), 128.5 (CH), 128.3 (CH), 127.3 (CH), 124.9 (C), 124.7 (q,  $J = 3.1$  Hz, CH), 121.9 (q,  $J = 275.0$  Hz,  $\text{CF}_3$ ), 61.6 ( $\text{CH}_2$ ), 13.6 ( $\text{CH}_3$ );  $^{19}\text{F NMR}$  (282 MHz,  $\text{CDCl}_3$ )  $\delta$  -62.74 (s, 3F,  $\text{CF}_3$ ); **IR** (neat): 2983, 1733, 1406, 1236, 1179, 1123, 995, 771, 700  $\text{cm}^{-1}$ ; **HRMS** (ESI) calculated for  $\text{C}_{19}\text{H}_{14}\text{NO}_2\text{F}_3\text{Na}$   $[\text{M}+\text{Na}]^+$   $m/z$  368.0869, found 368.0866.

***tert*-Butyl 4-phenyl-1-(trifluoromethyl)isoquinoline-3-carboxylate (3o)**

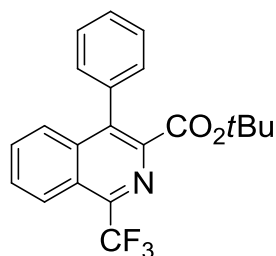

According to **method A** with *tert*-butyl 2-isocyano-3,3-diphenylacrylate **1o** (61.7 mg, 0.20 mmol, 1.0 equiv), *Togni*-reagent **2** (95.6 mg, 0.30 mmol, 1.5 equiv) and  $\text{Bu}_4\text{NI}$  (3.9 mg, 11  $\mu\text{mol}$ , 0.05 equiv). The crude reaction mixture was purified by flash silica gel column chromatography (pentane/diethyl ether = 10/1) to afford the desired product **3o** as white solid (59.6 mg, 80%).  $^1\text{H NMR}$  (300 MHz,  $\text{CDCl}_3$ )  $\delta$  8.31-8.28 (m, 1H, Ar-*H*), 7.70-7.61 (m, 3H, Ar-*H*), 7.46-7.41 (m, 3H, Ar-*H*), 7.31-7.26 (m, 2H, Ar-*H*), 1.14 (s, 9H,  $3\times\text{CH}_3$ );  $^{13}\text{C NMR}$  (75 MHz,  $\text{CDCl}_3$ )  $\delta$  165.5 (C), 145.7 (q,  $J = 33.7$  Hz, C), 142.1 (C), 137.0 (C), 135.6 (C), 135.4 (C), 131.2 (CH), 129.9 (CH), 129.4 (CH), 128.39 (CH), 128.36 (CH), 127.1 (CH), 124.7 (C), 124.6 (q,  $J = 3.2$  Hz, CH), 121.9 (q,  $J = 275.0$  Hz,  $\text{CF}_3$ ), 82.5 (C), 27.5 ( $\text{CH}_3$ );  $^{19}\text{F NMR}$  (282 MHz,  $\text{CDCl}_3$ )  $\delta$  -62.63 (s, 3F,  $\text{CF}_3$ ); **IR** (neat): 3056, 2987, 1723, 1407, 1249, 1119, 996, 935, 848, 767, 699  $\text{cm}^{-1}$ ; **HRMS** (ESI) calculated for  $\text{C}_{21}\text{H}_{18}\text{NO}_2\text{F}_3\text{Na}$   $[\text{M}+\text{Na}]^+$   $m/z$  396.1182, found 396.1180.



### Methyl 1-(perfluoroethyl)-4-phenylisoquinoline-3-carboxylate (**5a**)

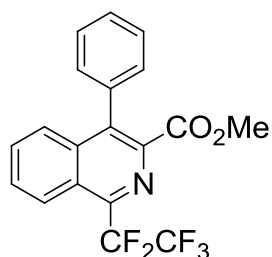

According to **method A** with methyl 2-isocyano-3,3-diphenylacrylate **1a** (53.3 mg, 0.20 mmol, 1.0 equiv), *Togni*-reagent **4a**<sup>5</sup> (111.6 mg, 0.30 mmol, 1.5 equiv) and Bu<sub>4</sub>Ni (3.9 mg, 11 μmol, 0.05 equiv). The crude reaction mixture was purified by flash silica gel column chromatography (pentane/diethyl ether = 10/1) to afford the desired product **5a** as pale yellow solid (40.2 mg, 53%). <sup>1</sup>H NMR (300 MHz, CDCl<sub>3</sub>) δ 8.41 (d, *J* = 8.1 Hz, 1H, Ar-*H*), 7.74-7.65 (m, 3H, Ar-*H*), 7.47-7.43 (m, 3H, Ar-*H*), 7.28-7.25 (m, 2H, Ar-*H*), 3.62 (s, 3H, CH<sub>3</sub>); <sup>13</sup>C NMR (75 MHz, CDCl<sub>3</sub>) δ 166.5 (C), 145.5 (t, *J* = 26.2 Hz, C), 140.4 (C), 137.1 (C), 137.0 (C), 134.9 (C), 131.2 (CH), 129.7 (CH), 129.5 (CH), 128.6 (CH), 128.4 (CH), 127.5 (CH), 126.1 (C), 124.8 (t, *J* = 6.0 Hz, CH), 120-100 (m, C), 52.5 (CH<sub>3</sub>); <sup>19</sup>F NMR (282 MHz, CDCl<sub>3</sub>) δ -80.76 (t, *J* = 1.4, 3F, CF<sub>2</sub>CF<sub>3</sub>), -107.22 (brs, 2F, CF<sub>2</sub>CF<sub>3</sub>); IR (neat): 2954, 1737, 1445, 1403, 1326, 1227, 1170, 1104, 1069, 1049, 993, 959, 877, 770, 701 cm<sup>-1</sup>; HRMS (ESI) calculated for C<sub>19</sub>H<sub>12</sub>NO<sub>2</sub>F<sub>5</sub>Na [M+Na]<sup>+</sup> *m/z* 404.0680, found 404.0680.

### Methyl 1-(perfluoropropyl)-4-phenylisoquinoline-3-carboxylate (**5b**)

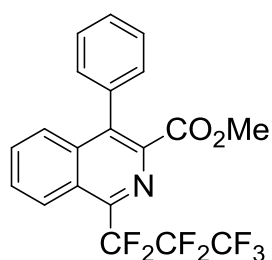

According to **method A** with methyl 2-isocyano-3,3-diphenylacrylate **1a** (53.5 mg, 0.20 mmol, 1.0 equiv), *Togni*-reagent **4b**<sup>6</sup> (126.3 mg, 0.30 mmol, 1.5 equiv) and Bu<sub>4</sub>Ni (4.0 mg, 11 μmol, 0.05 equiv). The crude reaction mixture was purified by flash silica gel column chromatography (pentane/diethyl ether = 10/1) to afford the desired product **5b** as pale yellow solid (46.4 mg, 54%). <sup>1</sup>H NMR (300 MHz, CDCl<sub>3</sub>) δ 8.40-8.37 (m, 1H, Ar-*H*), 7.72-7.61 (m, 3H, Ar-*H*), 7.46-7.43 (m, 3H, Ar-*H*), 7.29-7.26 (m, 2H, Ar-*H*), 3.62 (s, 3H, CH<sub>3</sub>); <sup>13</sup>C NMR (75 MHz, CDCl<sub>3</sub>) δ 166.5 (C),

145.3 (t,  $J = 24.5$  Hz, C), 140.7 (C), 137.2 (C), 136.9 (C), 134.9 (C), 131.1 (CH), 129.7 (CH), 129.5 (CH), 128.6 (CH), 128.4 (CH), 127.5 (CH), 126.5 (C), 125.1-124.9 (m, C), 120-100 (m, C), 52.5 (CH<sub>3</sub>); **<sup>19</sup>F NMR** (282 MHz, CDCl<sub>3</sub>)  $\delta$  -79.41 (t,  $J = 9.6$  Hz, 3F, CF<sub>2</sub>CF<sub>2</sub>CF<sub>3</sub>), -106.15 – -106.25 (m, 2F, CF<sub>2</sub>CF<sub>2</sub>CF<sub>3</sub>), -124.03 (t,  $J = 9.6$  Hz, 2F, CF<sub>2</sub>CF<sub>2</sub>CF<sub>3</sub>); **IR** (neat): 2955, 1738, 1445, 1341, 1203, 1114, 987, 946, 854, 769, 700 cm<sup>-1</sup>; **HRMS** (ESI) calculated for C<sub>20</sub>H<sub>12</sub>NO<sub>2</sub>F<sub>7</sub>Na [M+Na]<sup>+</sup> m/z 454.0648, found 454.0651.

### Larger scale experiment

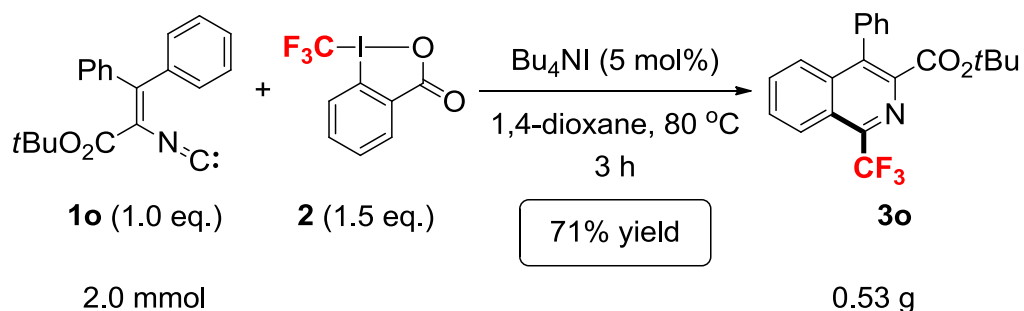

*tert*-Butyl 2-isocyano-3,3-diphenylacrylate **1o** (0.556 g, 0.002 mol, 1.0 equiv), Togni-reagent **2** (0.953 g, 0.003 mol, 1.5 equiv) and Bu<sub>4</sub>NI (37.6 mg, 0.10 mmol, 0.05 equiv) were placed in a dry *Schlenk* tube under argon. Dry 1,4-dioxane (10.0 mL) was added and the reaction mixture was stirred at 80 °C for 3 h as monitored by TLC. The solvent was removed and the crude reaction mixture was purified by flash silica gel column chromatography (pentane/diethyl ether = 10/1) to afford the desired product **3o** (0.530 g, 71%).

### The reduction of **3a**

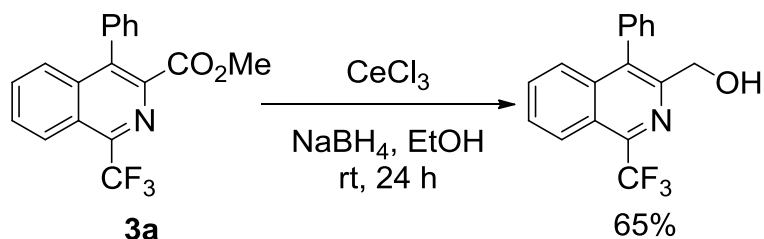

$\text{NaBH}_4$  (39.7 mg, 1.00 mmol, 5.0 equiv) was added to a stirred solution of methyl 4-phenyl-1-(trifluoromethyl)isoquinoline-3-carboxylate **3a** (66.8 mg, 0.20 mmol, 1.0 equiv) and  $\text{CeCl}_3 \cdot 7\text{H}_2\text{O}$  (4.2 mg, 10  $\mu\text{mol}$ , 0.05 equiv) in  $\text{EtOH}$  (2.0 mL) at room temperature. The resulting suspension was stirred for 24 h. The solvent was removed in vacuo and the residue was purified by silica gel column chromatography ( $\text{PE}/\text{Et}_2\text{O} = 3/1$ ) to afford 39.3 mg (65%) of product as pale yellow solid.  $^1\text{H NMR}$  (300 MHz,  $\text{CDCl}_3$ )  $\delta$  8.29-8.26 (m, 1H, Ar-*H*), 7.64-7.56 (m, 2H, Ar-*H*), 7.53-7.43 (m, 4H, Ar-*H*), 7.22-7.19 (m, 2H, Ar-*H*), 4.53 (s, 2H,  $\text{CH}_2$ ), 3.59 (brs, 1H, OH);  $^{13}\text{C NMR}$  (75 MHz,  $\text{CDCl}_3$ )  $\delta$  147.4 (C), 144.8 (q,  $J = 33.4$  Hz, C), 137.2 (C), 134.3 (C), 133.7 (C), 131.0 (CH), 129.5 (CH), 129.0 (CH), 128.7 (CH), 128.3 (CH), 126.1 (CH), 124.6 (q,  $J = 3.0$  Hz, CH), 123.8 (C), 122.1 (q,  $J = 274.5$  Hz,  $\text{CF}_3$ ), 62.0 ( $\text{CH}_2$ );  $^{19}\text{F NMR}$  (282 MHz,  $\text{CDCl}_3$ )  $\delta$  -62.69 (s, 3F,  $\text{CF}_3$ ); IR (neat): 3443, 3062, 2924, 2884, 1573, 1407, 1348, 1291, 1174, 1126, 1070, 997, 771, 702  $\text{cm}^{-1}$ ; HRMS (ESI) calculated for  $\text{C}_{17}\text{H}_{12}\text{NOF}_3\text{Na}$   $[\text{M}+\text{Na}]^+$   $m/z$  326.0763, found 326.0756.

## Mechanistic study

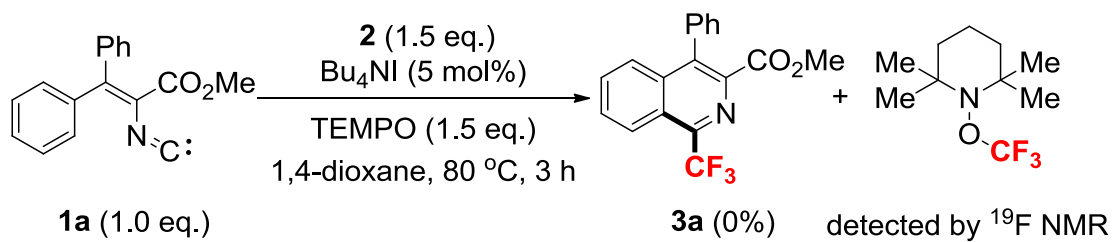

$\beta$ -Aryl- $\alpha$ -isocyano-acrylates **1a** (53.2 mg, 0.20 mmol, 1.0 equiv), *Togni*-reagent **2** (95.8 mg, 0.30 mmol, 1.5 equiv), Bu<sub>4</sub>NI (3.9 mg, 11  $\mu$ mol, 0.05 equiv) and TEMPO (47.5 mg, 0.30 mmol, 1.5 equiv) were placed in a dry *Schlenk* tube under argon. Dry 1,4-dioxane (1.0 mL) was added and the reaction mixture was stirred at 80 °C for 3 h. <sup>19</sup>F NMR analysis of this reaction mixture showed that TEMPO-CF<sub>3</sub> was formed. <sup>19</sup>F NMR (282 MHz, CDCl<sub>3</sub>)  $\delta$  -55.7. <sup>19</sup>F NMR spectrum was matching with literature data.<sup>4</sup>

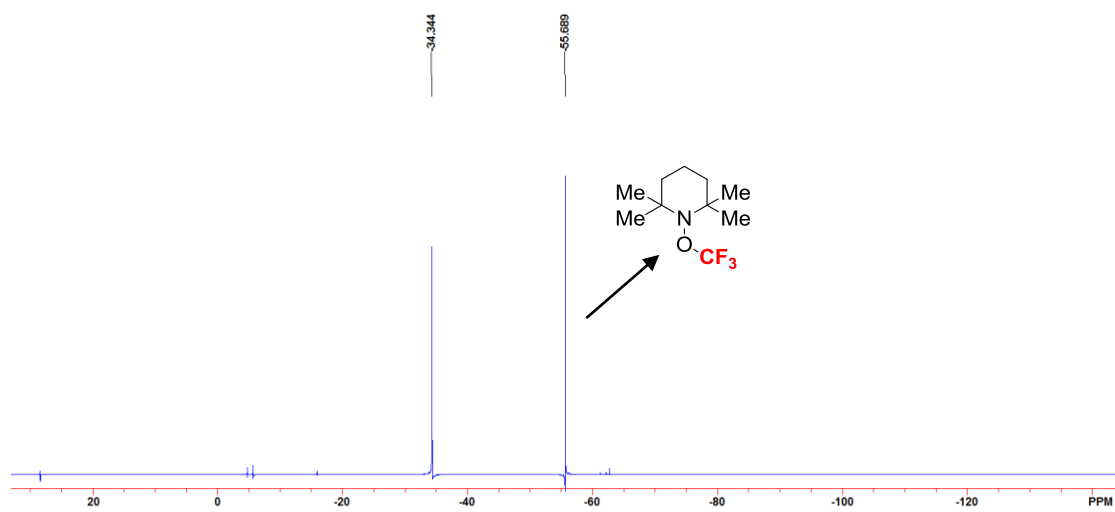

## **References:**

- (1) Jiang, H.; Cheng, Y.; Wang, R.; Zhang, Y.; Yu, S. *Chem. Commun.* **2014**, *50*, 6164.
- (2) Suzuki, M.; Nunami, K.-I.; Matsumoto, K.; Yoneda, N.; Kasuga, O.; Yoshida, H.; Yamaguchi, T. *Chem. Pharm. Bull.* **1980**, *28*, 2374.
- (3) Eisenberger, P.; Gischig, S.; Togni, A. *Chem.-Eur. J.* **2006**, *12*, 2579.
- (4) Wang, X.; Ye, Y.; Zhang, S.; Feng, J.; Xu, Y.; Zhang, Y.; Wang, J. *J. Am. Chem. Soc.* **2011**, *133*, 16410.
- (5) Li, Y.; Studer, A. *Angew. Chem. Int. Ed.* **2012**, *51*, 8221.
- (6) Zhang, B.; Mück-Lichtenfeld, C.; Daniliuc, C. G.; Studer, A. *Angew. Chem., Int. Ed.* **2013**, *52*, 10792.

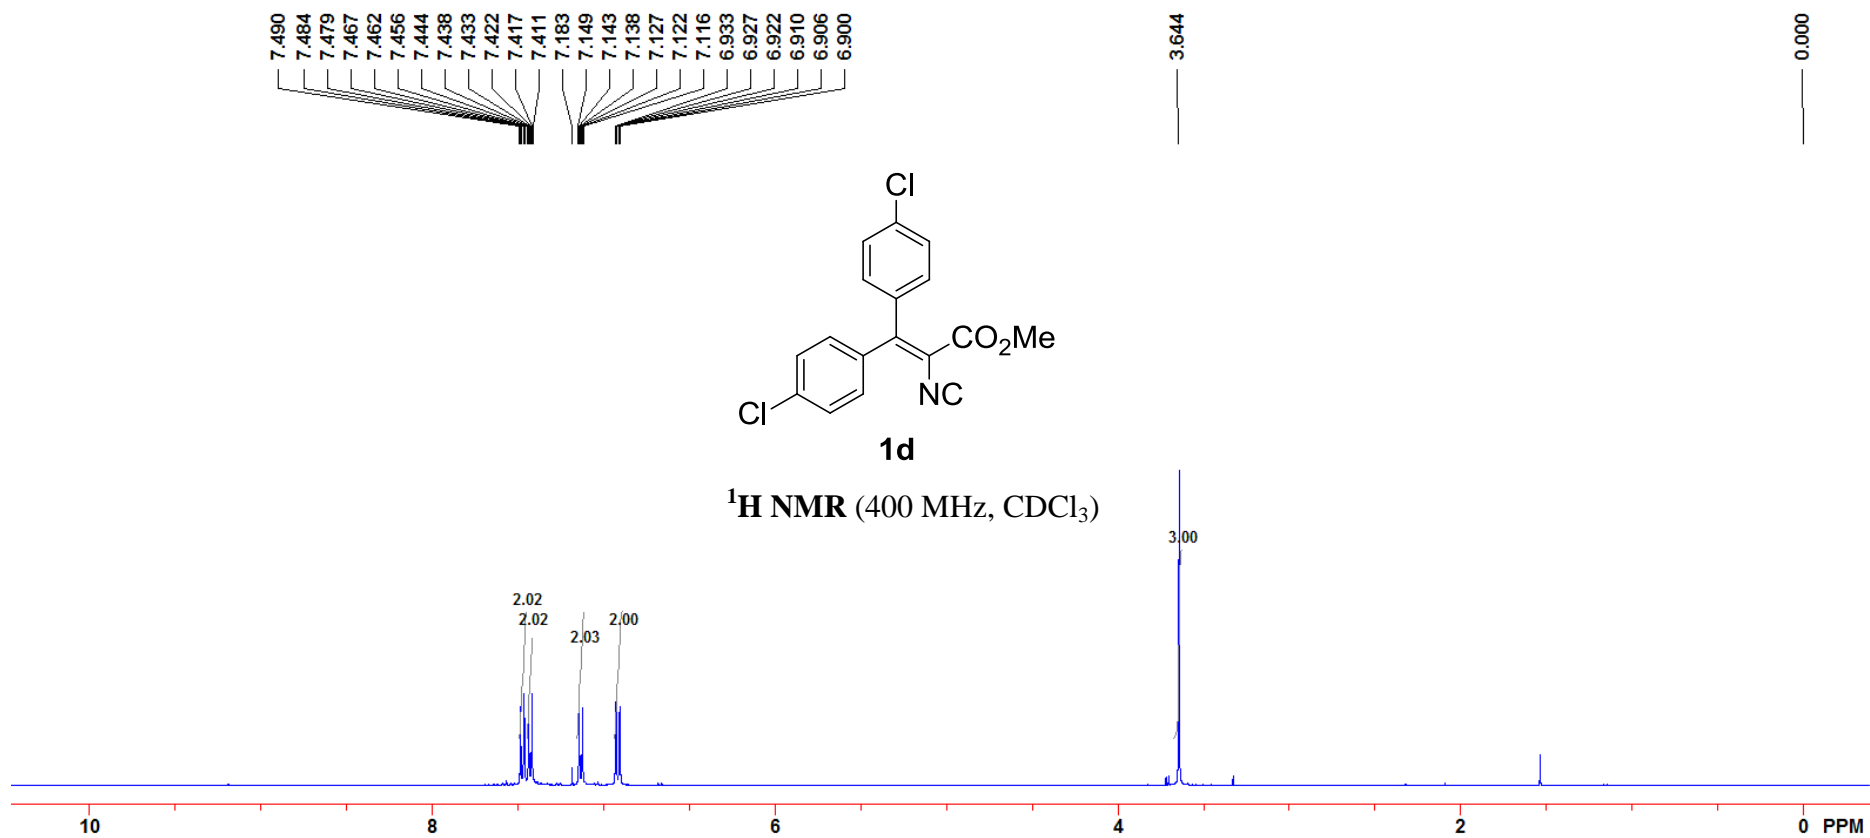

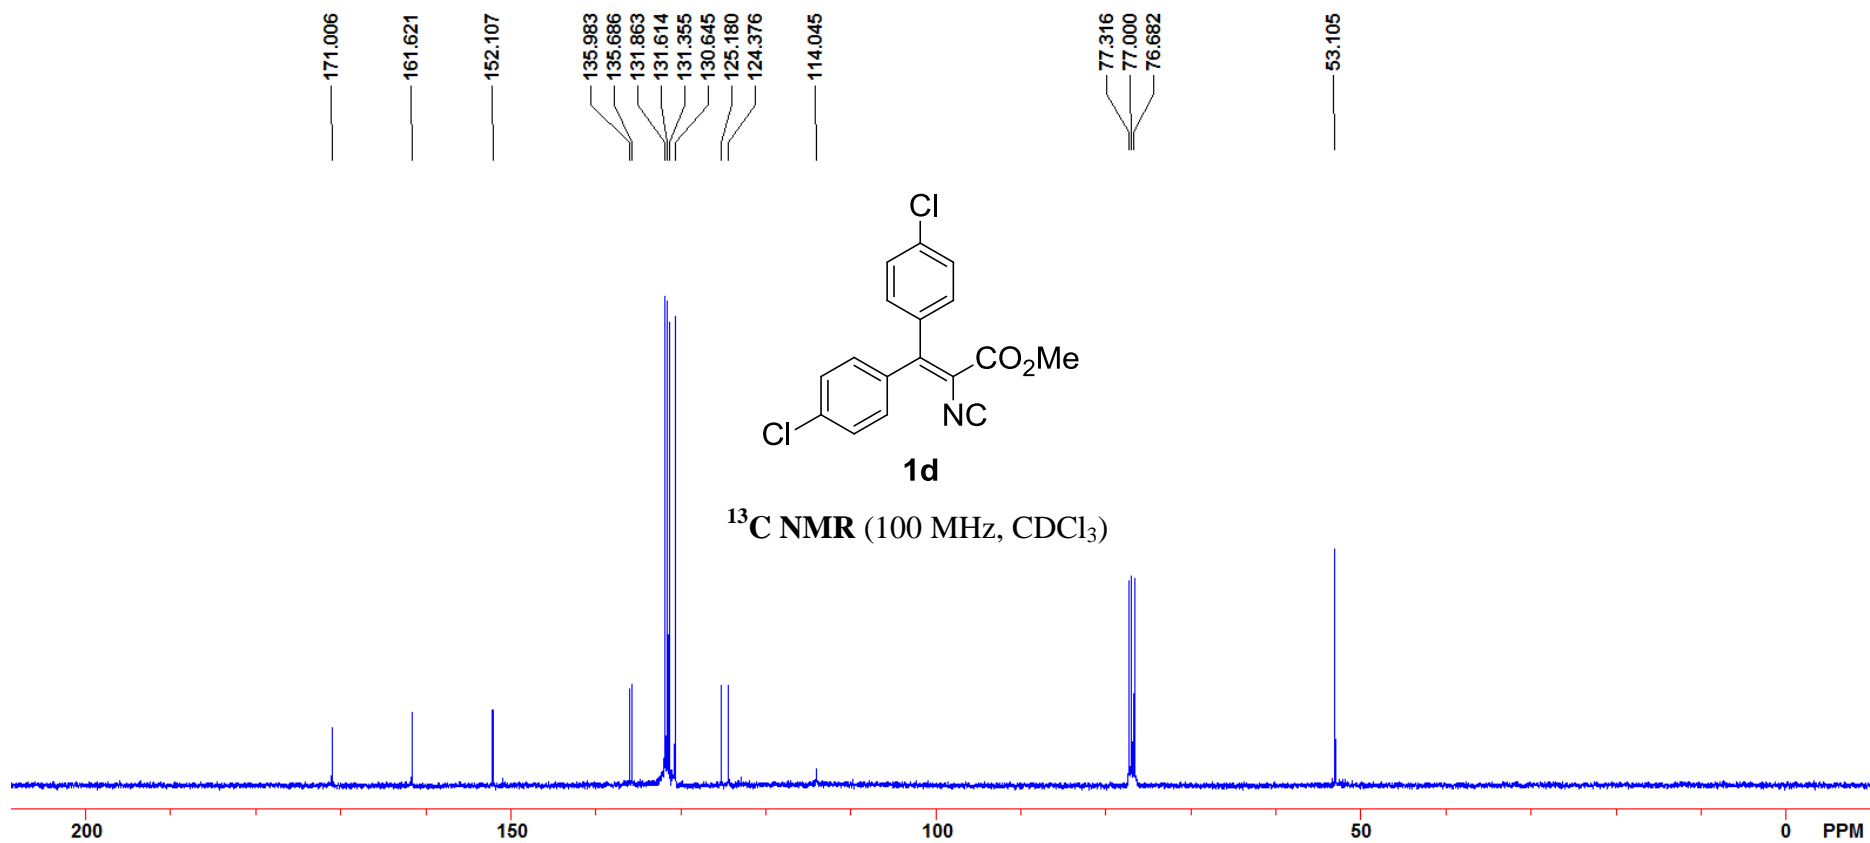



7.329  
7.323  
7.318  
7.306  
7.301  
7.295  
7.286  
7.279  
7.274  
7.263  
7.258  
7.252  
7.221  
7.215  
7.209  
7.198  
7.193  
7.187  
7.000  
6.994  
6.989  
6.977  
6.973  
6.966

3.639

0.000

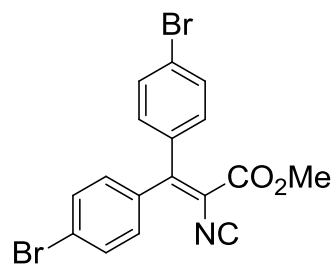

**1e**

<sup>1</sup>H NMR (400 MHz, CDCl<sub>3</sub>)

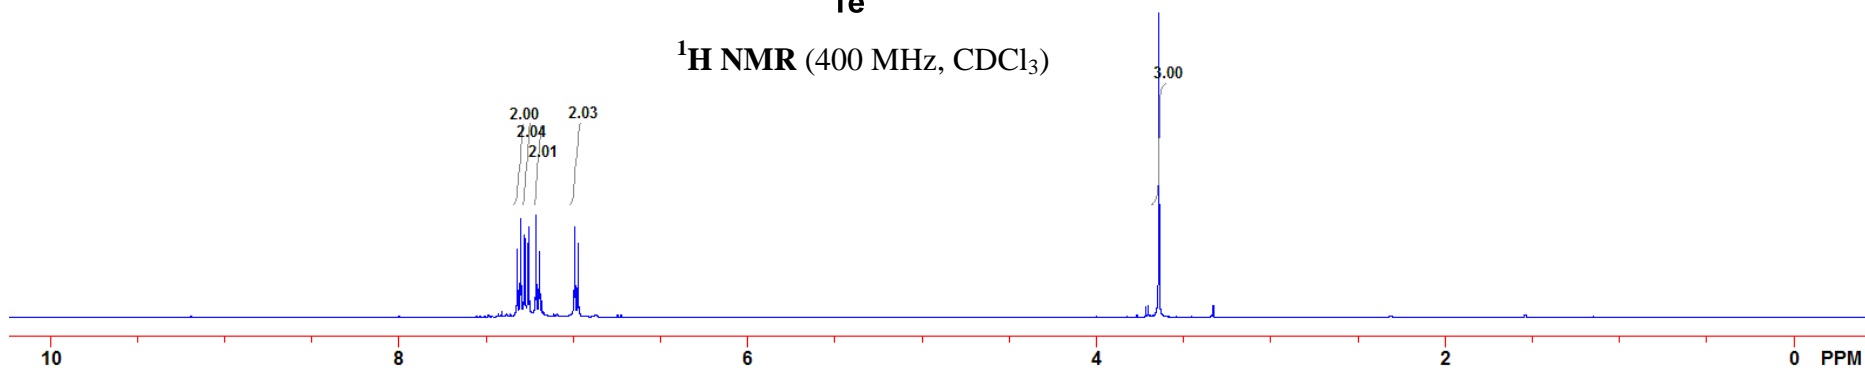

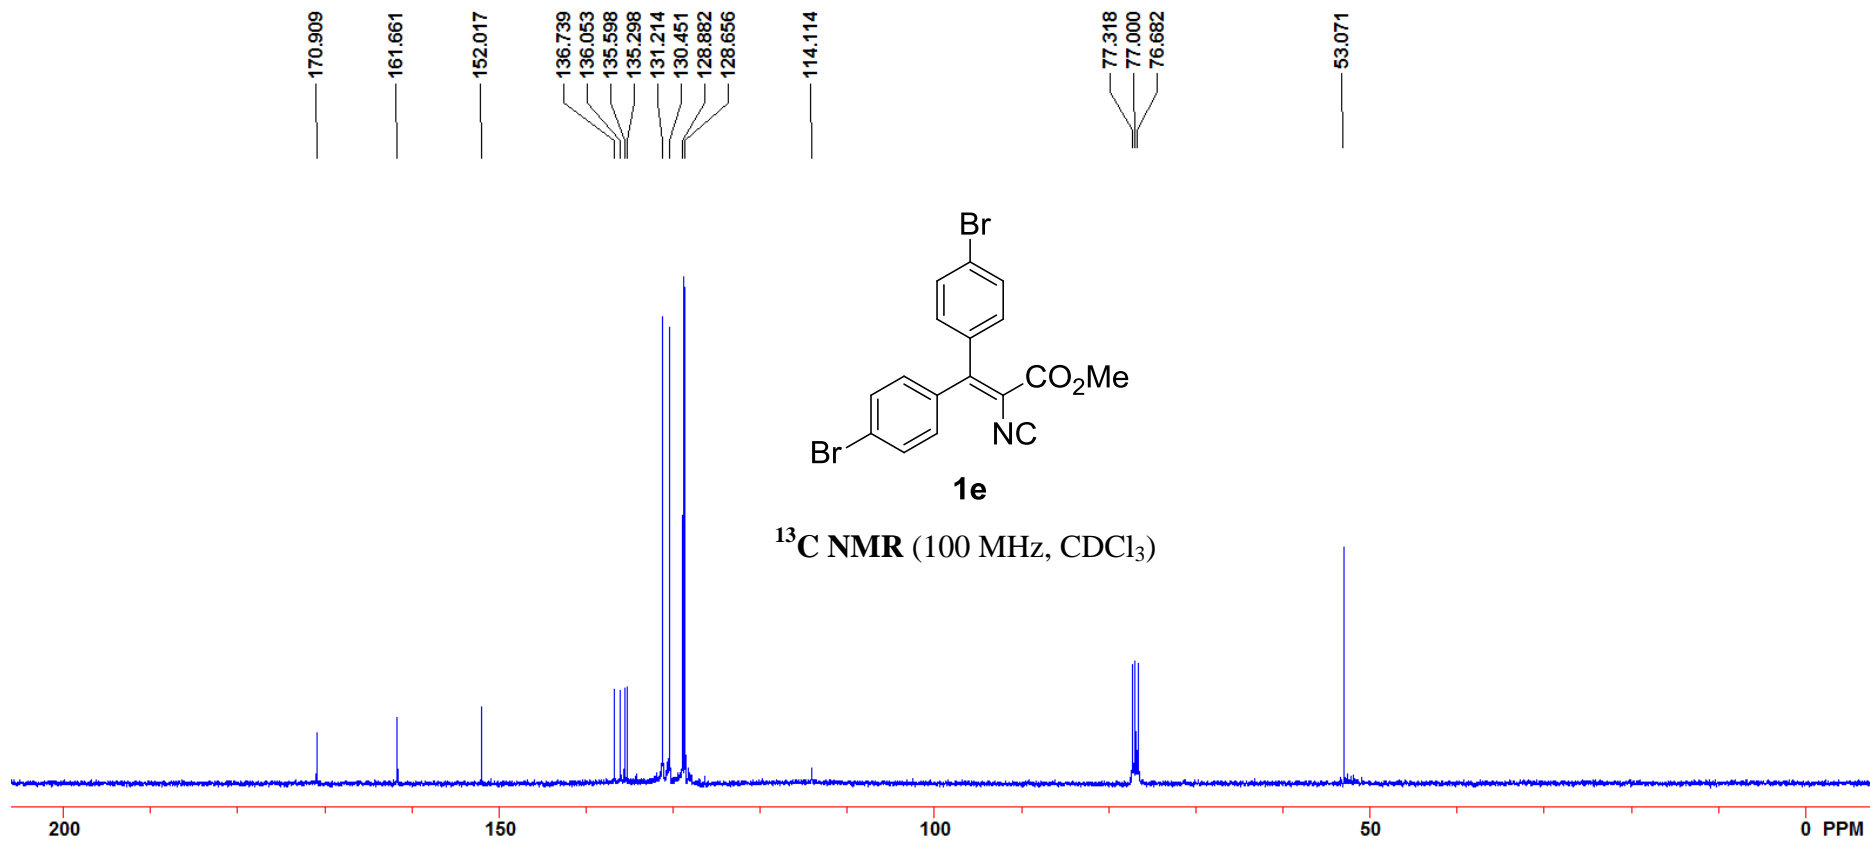

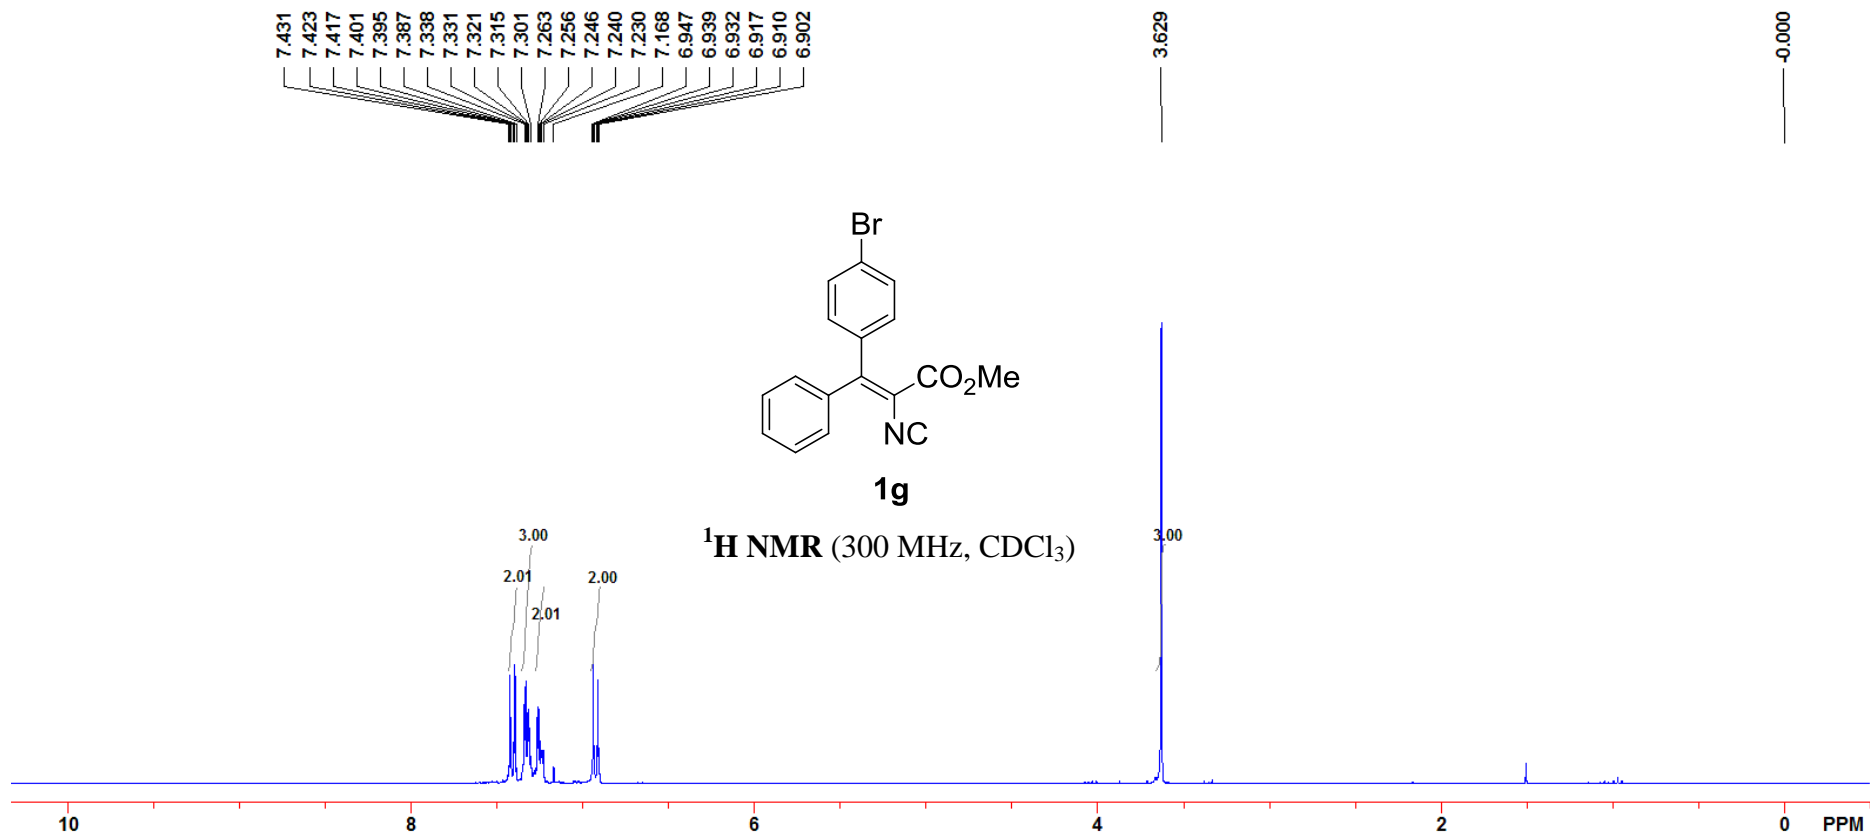

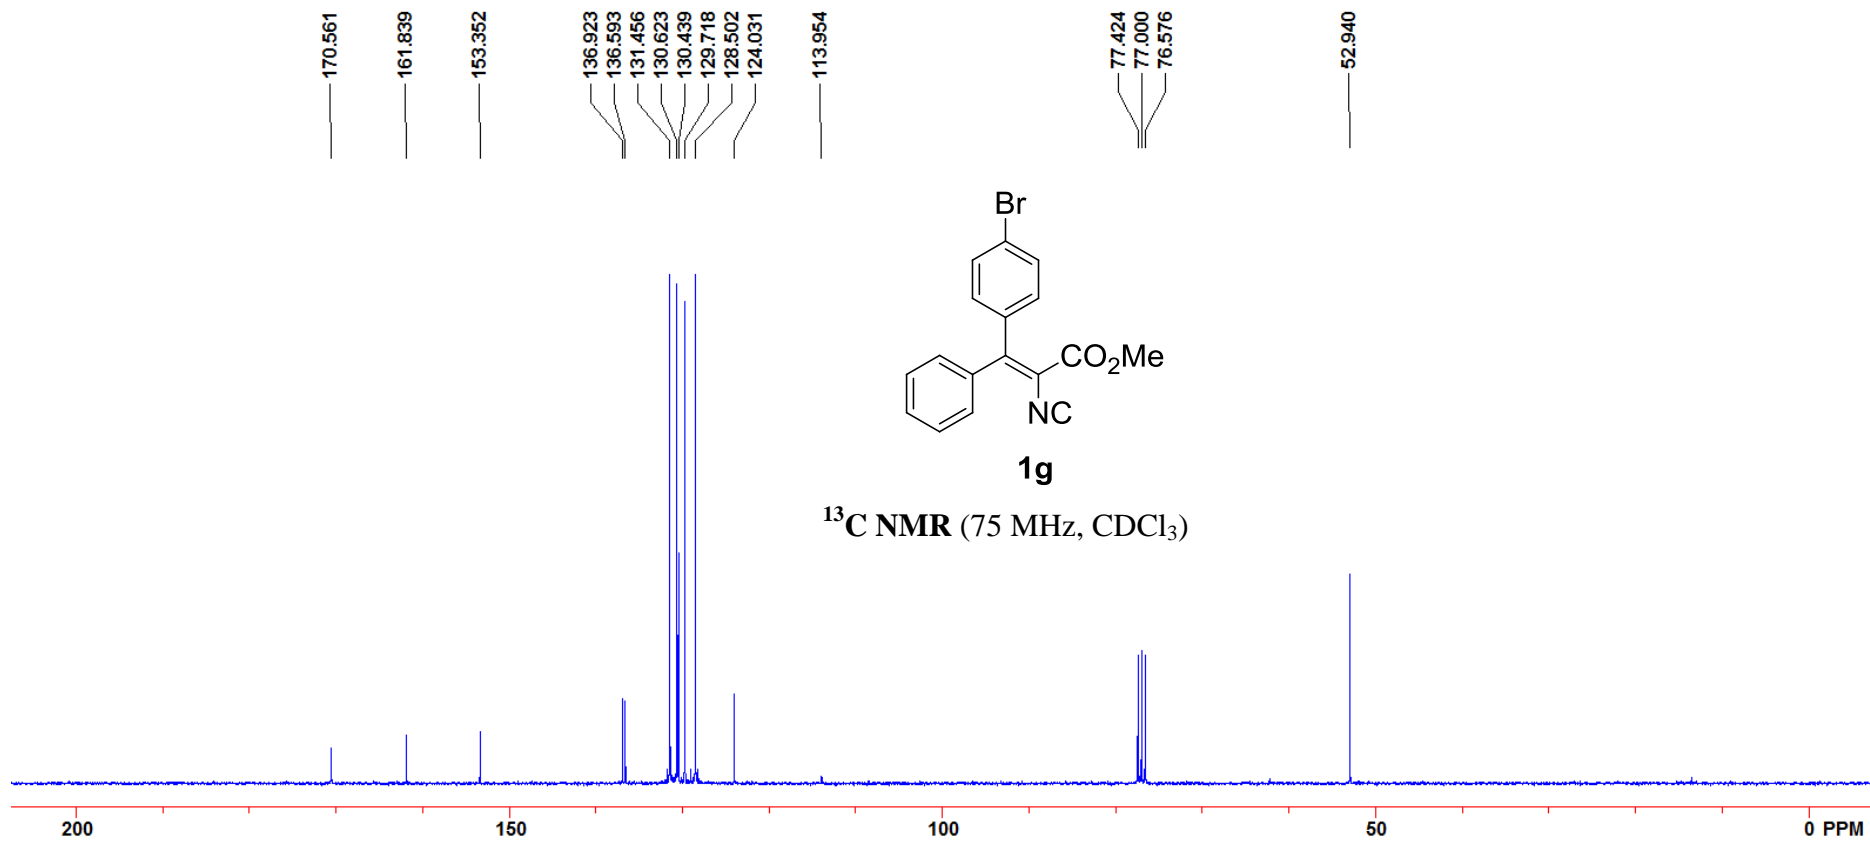

7.207  
7.186  
7.159  
7.139

3.786

2.459  
2.289

0.000

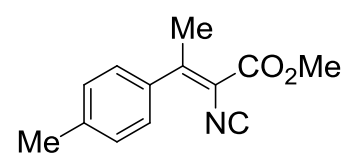

**1i**

<sup>1</sup>H NMR (400 MHz, CDCl<sub>3</sub>)

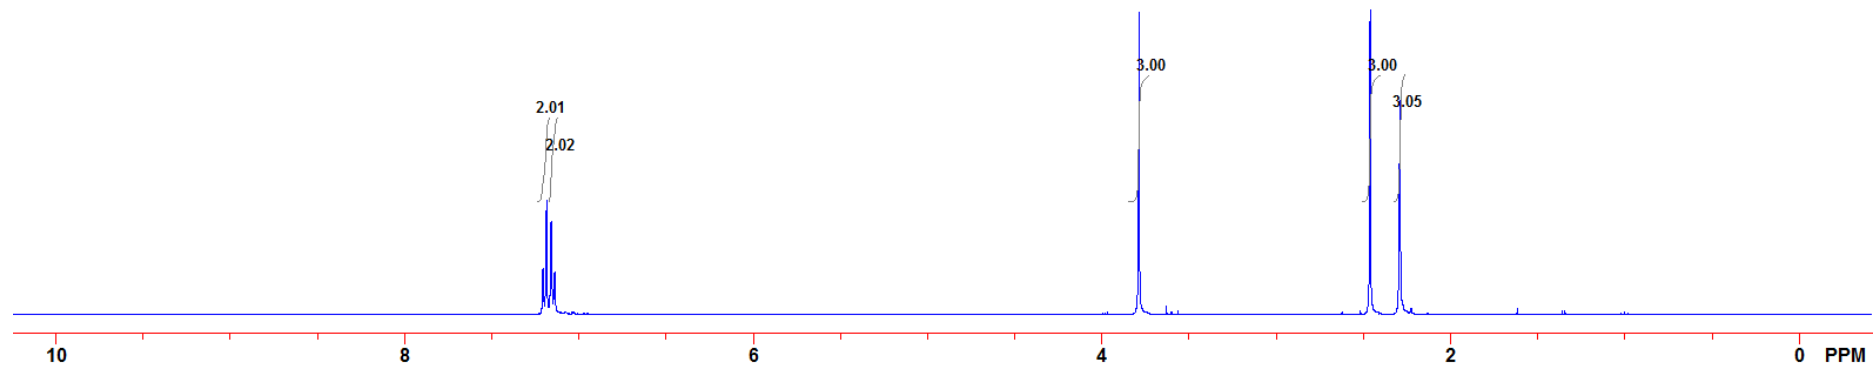

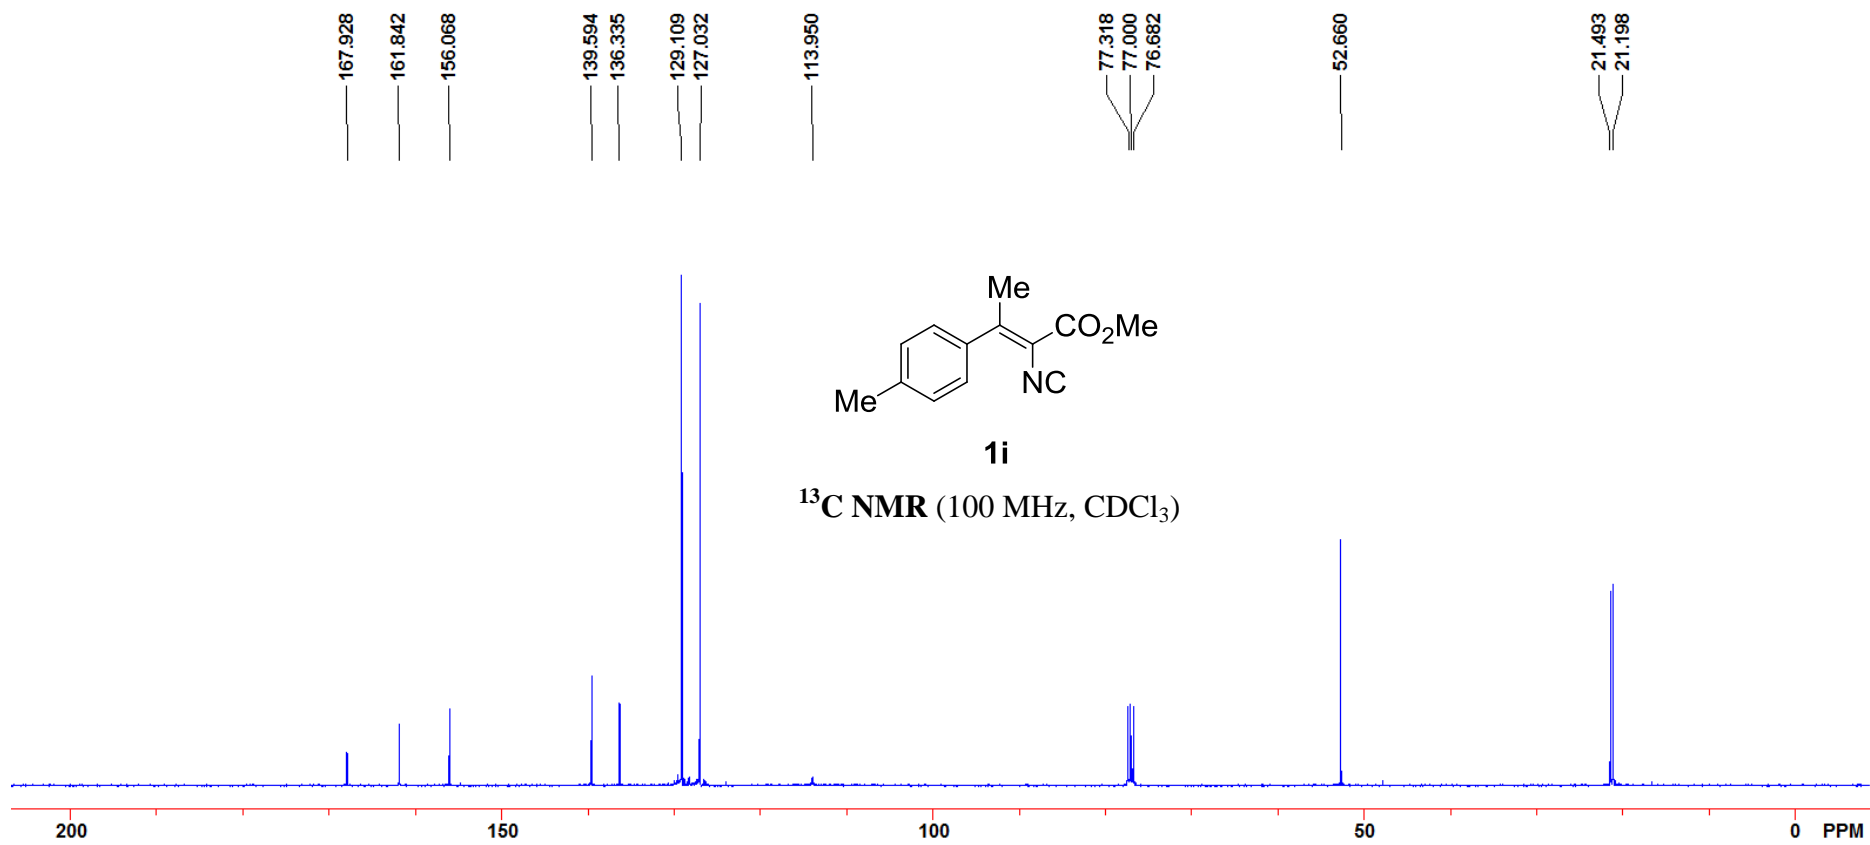

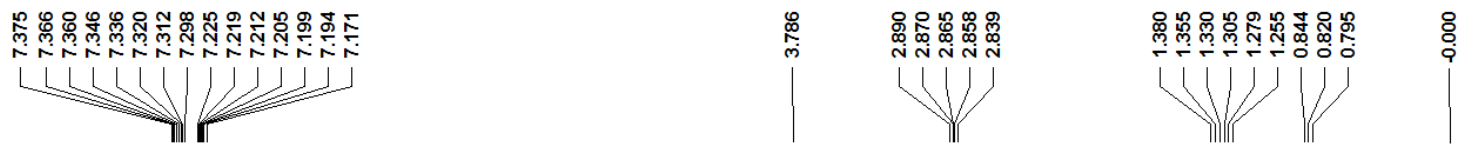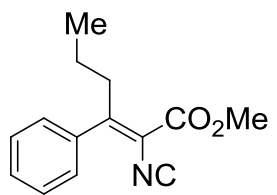

**1j**

<sup>1</sup>H NMR (300 MHz, CDCl<sub>3</sub>)

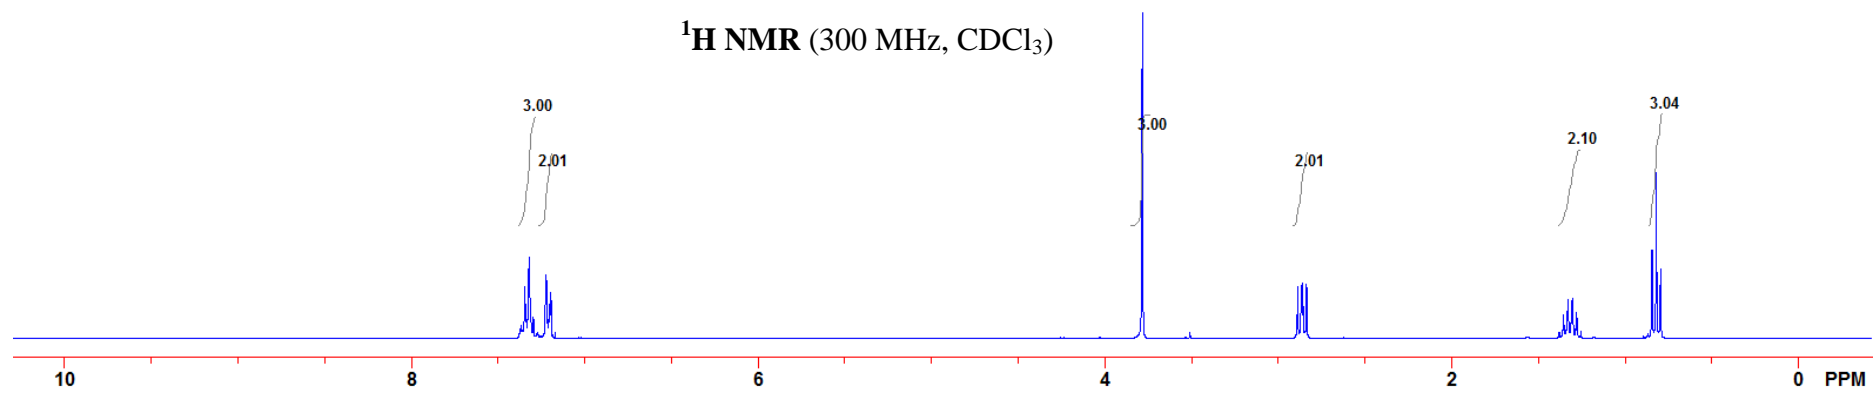

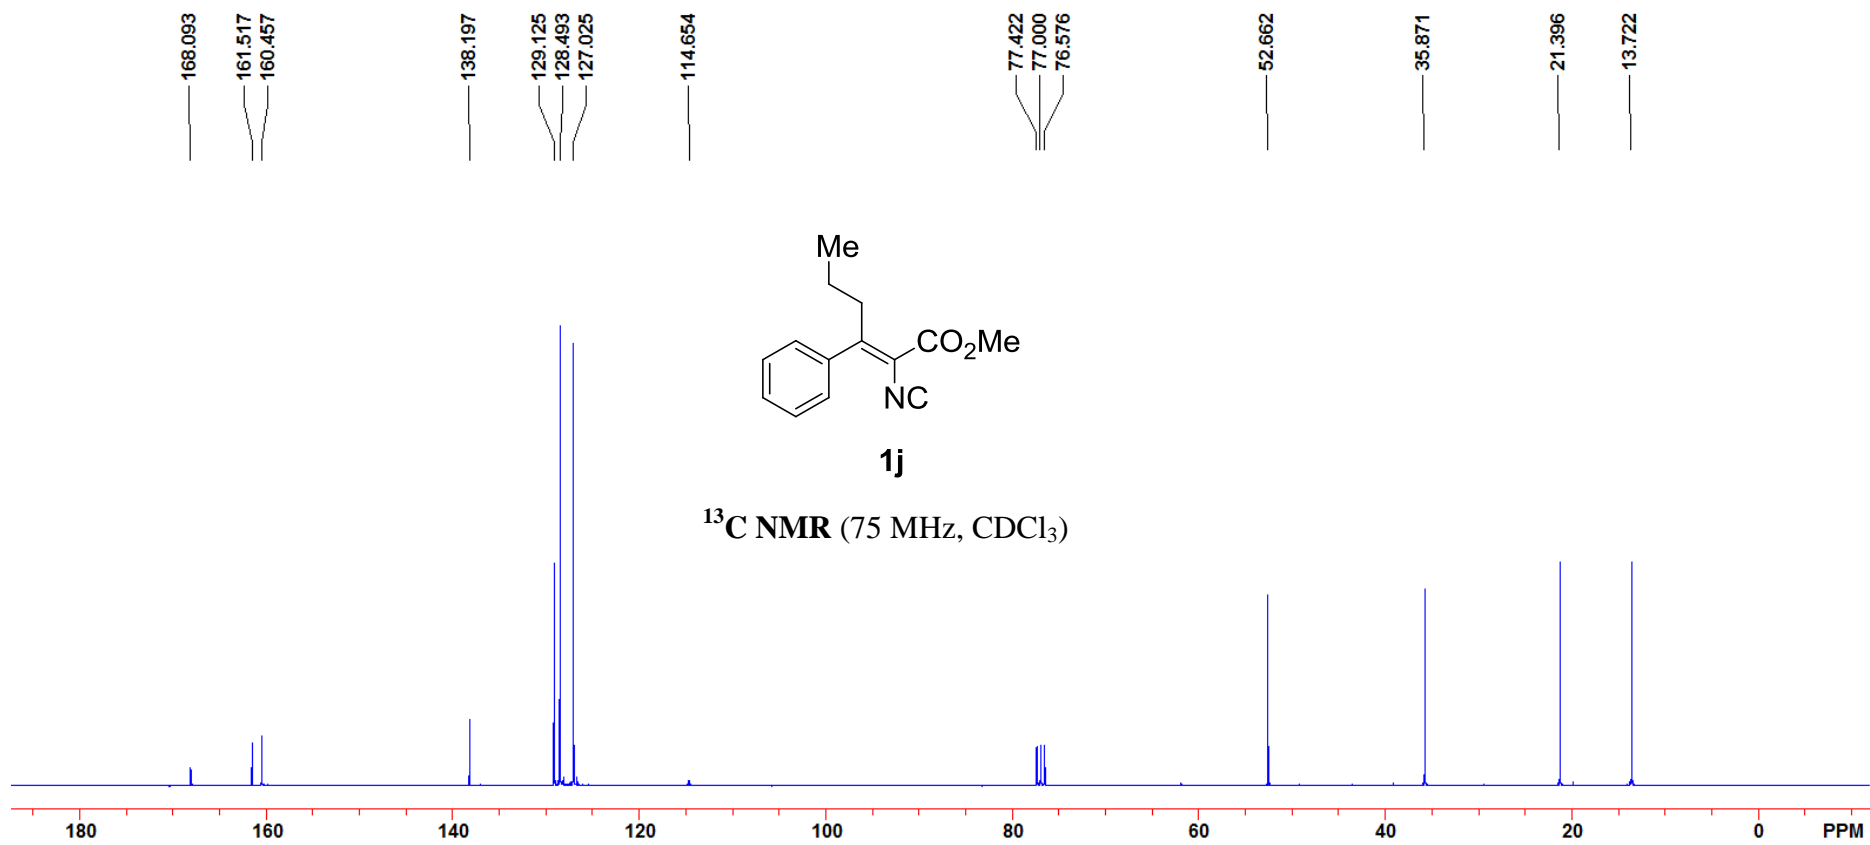



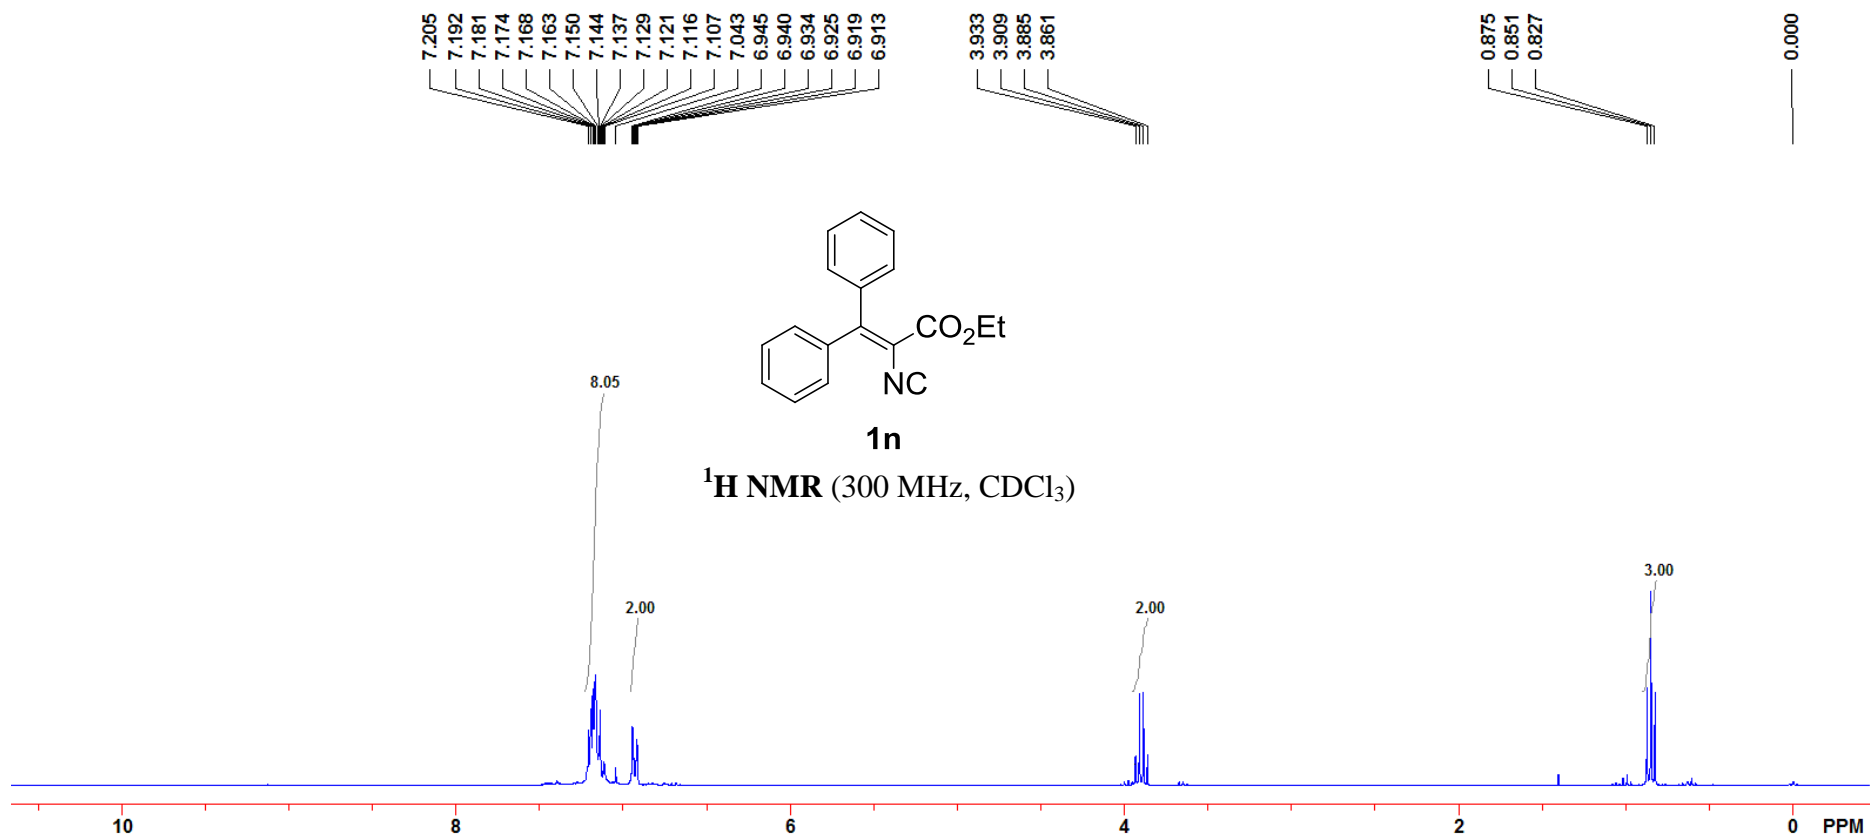

169.735  
161.854  
153.715  
137.968  
137.328  
130.134  
129.767  
129.352  
129.021  
128.362  
128.140  
114.342  
77.424  
77.000  
76.576  
62.122  
13.481

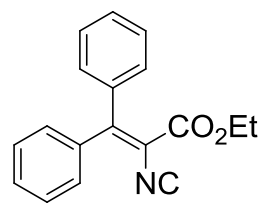

**1n**

<sup>13</sup>C NMR (75 MHz, CDCl<sub>3</sub>)

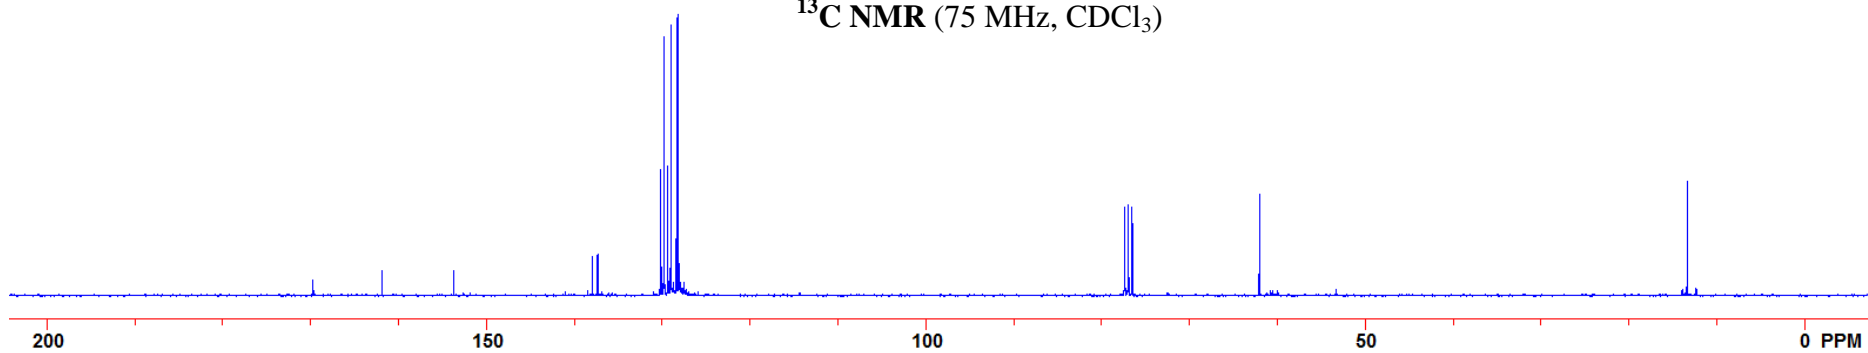

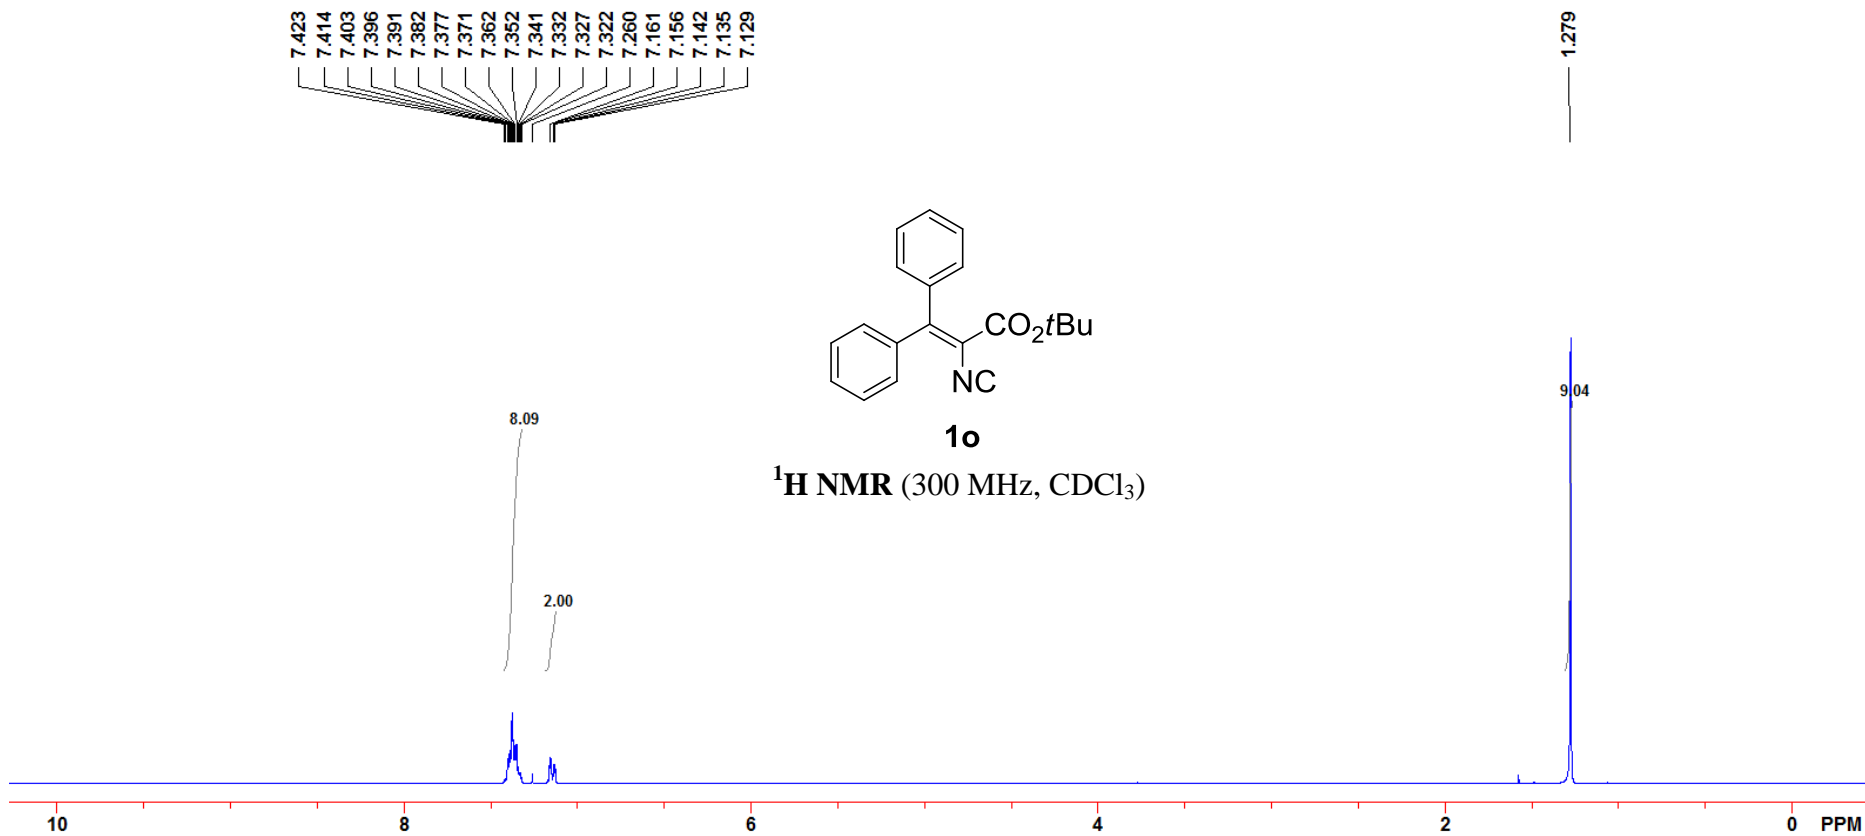

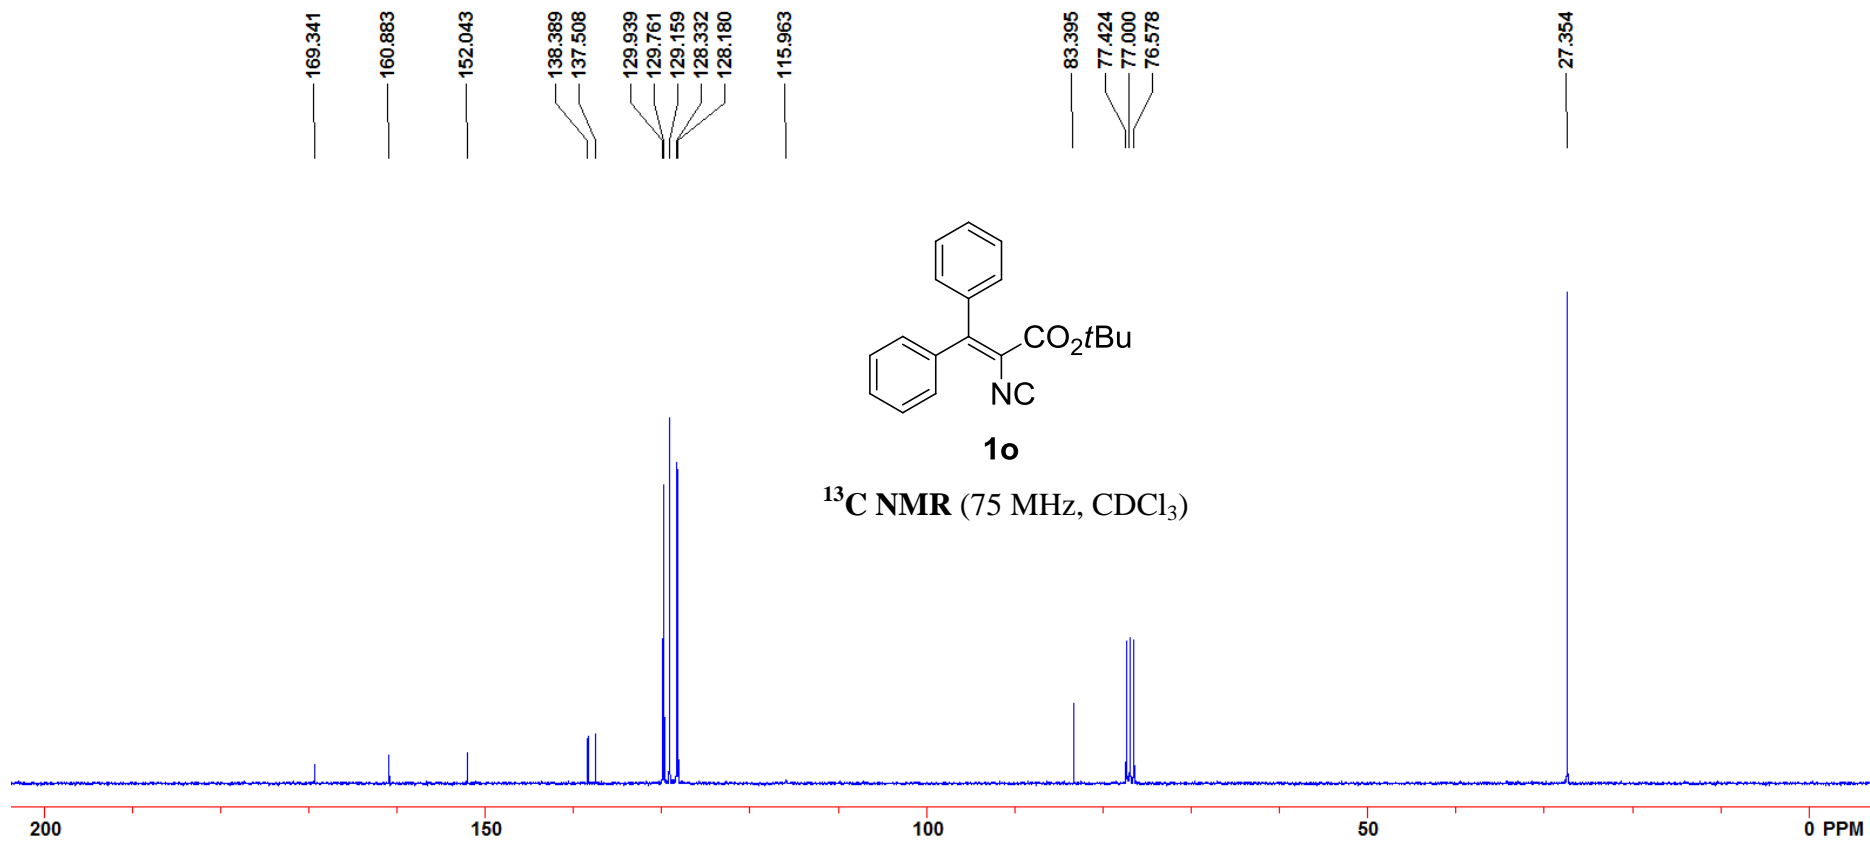

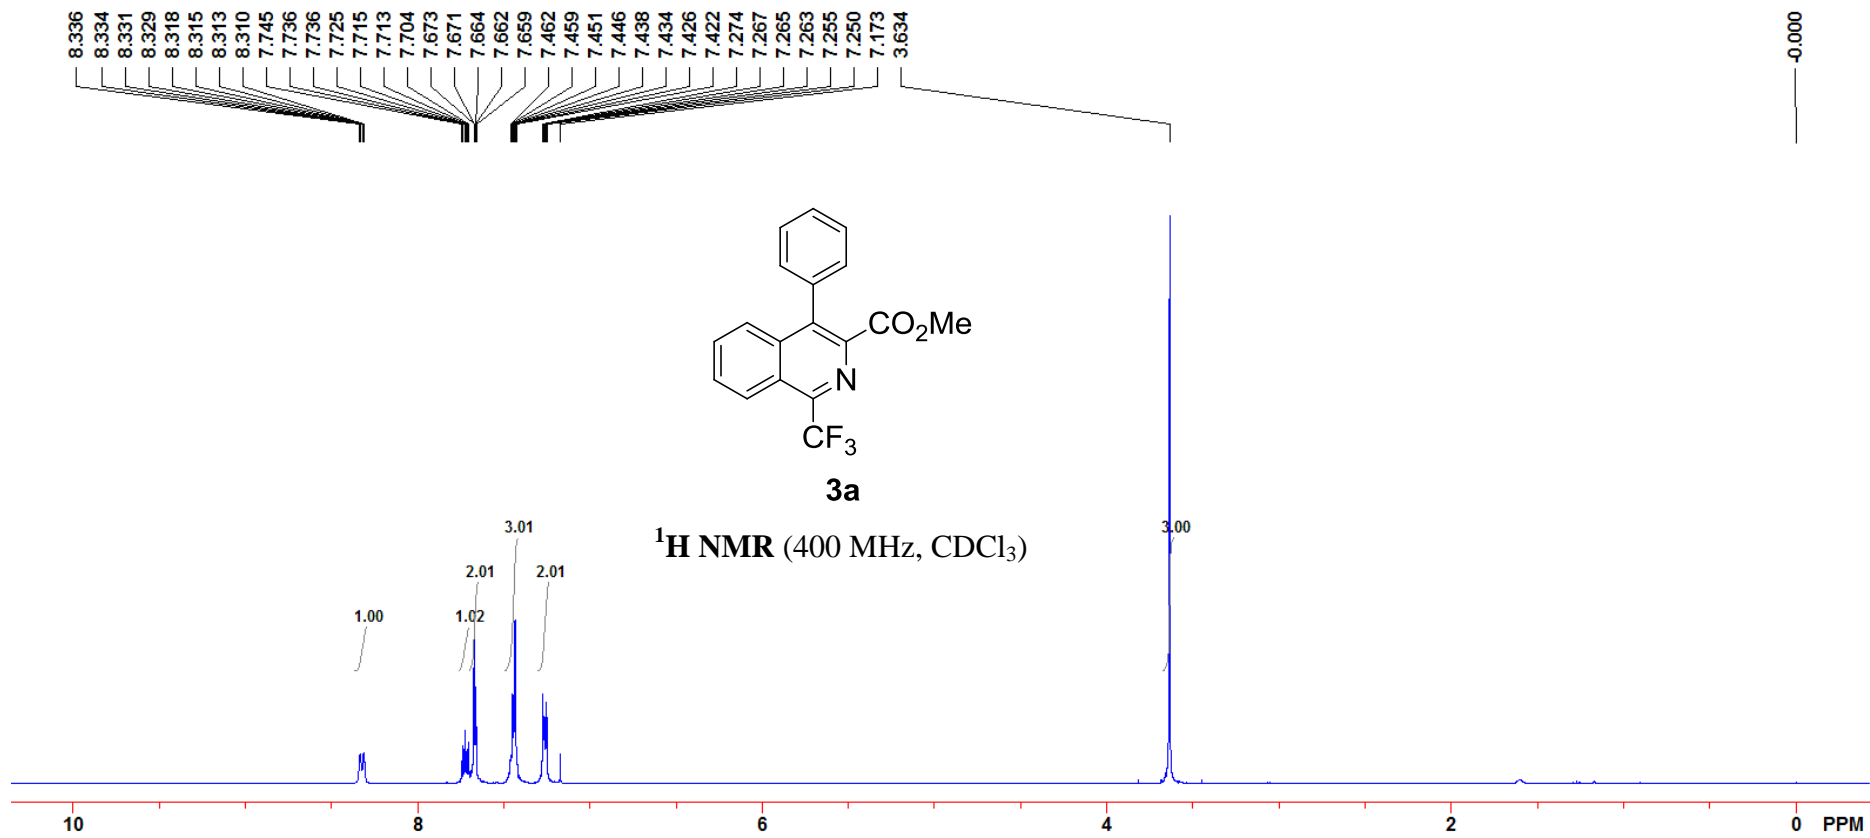

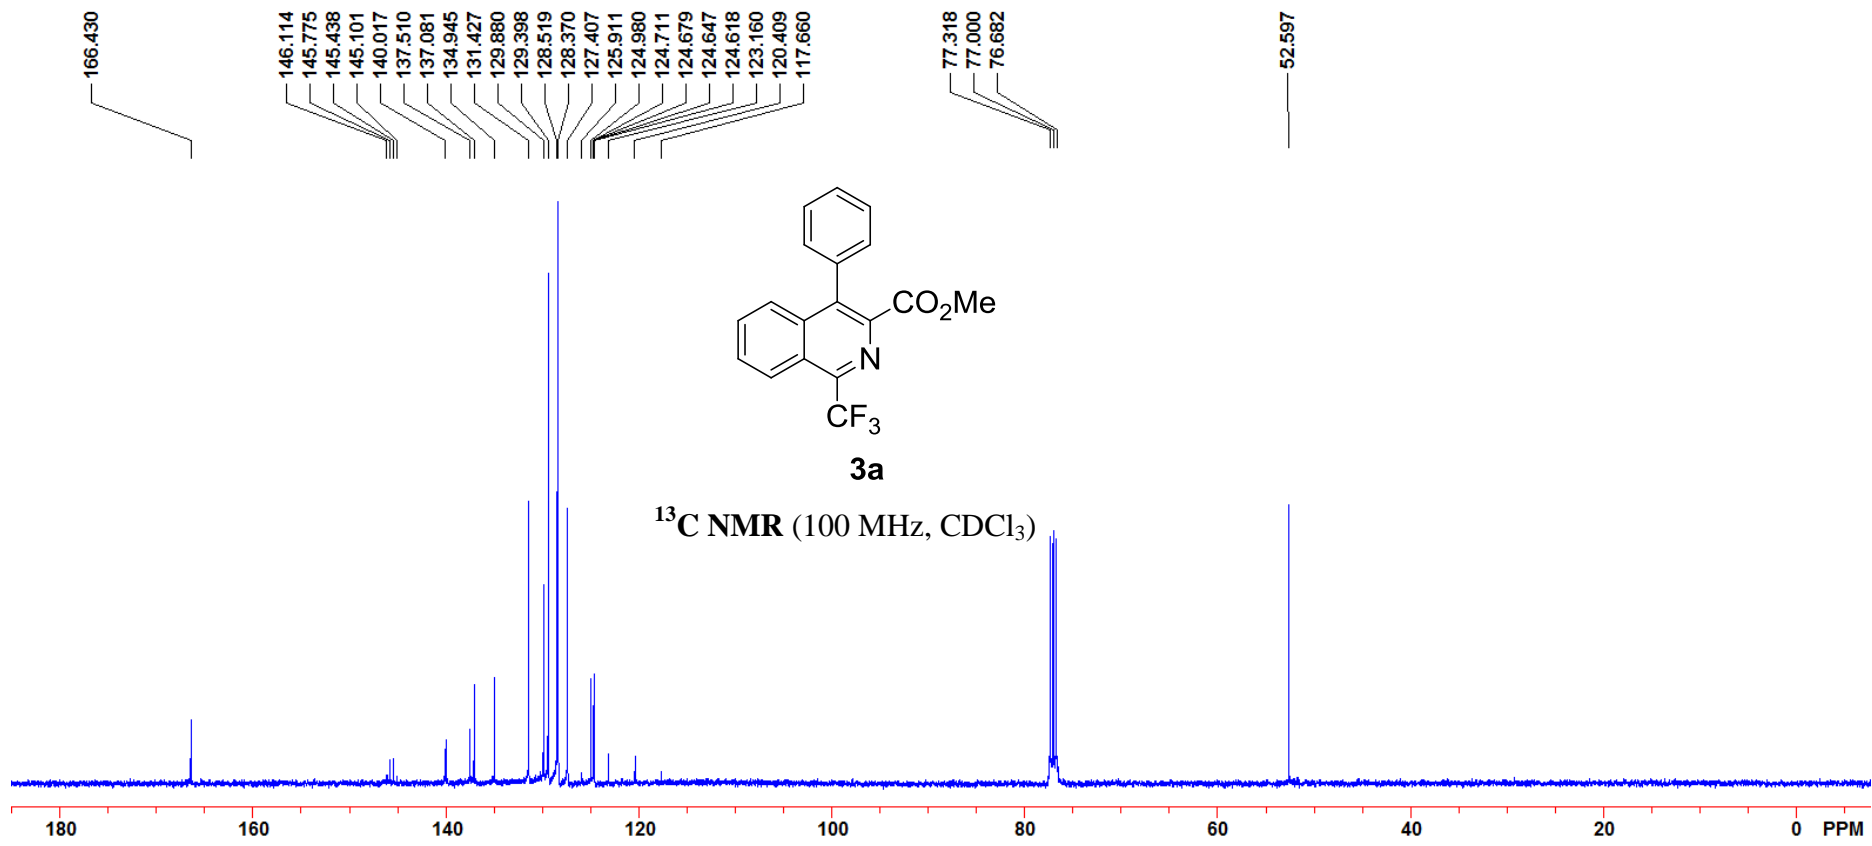

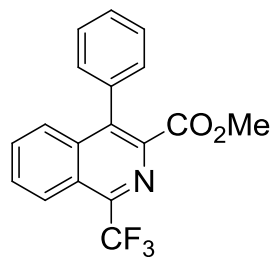

**3a**

<sup>19</sup>F NMR (282 MHz, CDCl<sub>3</sub>)

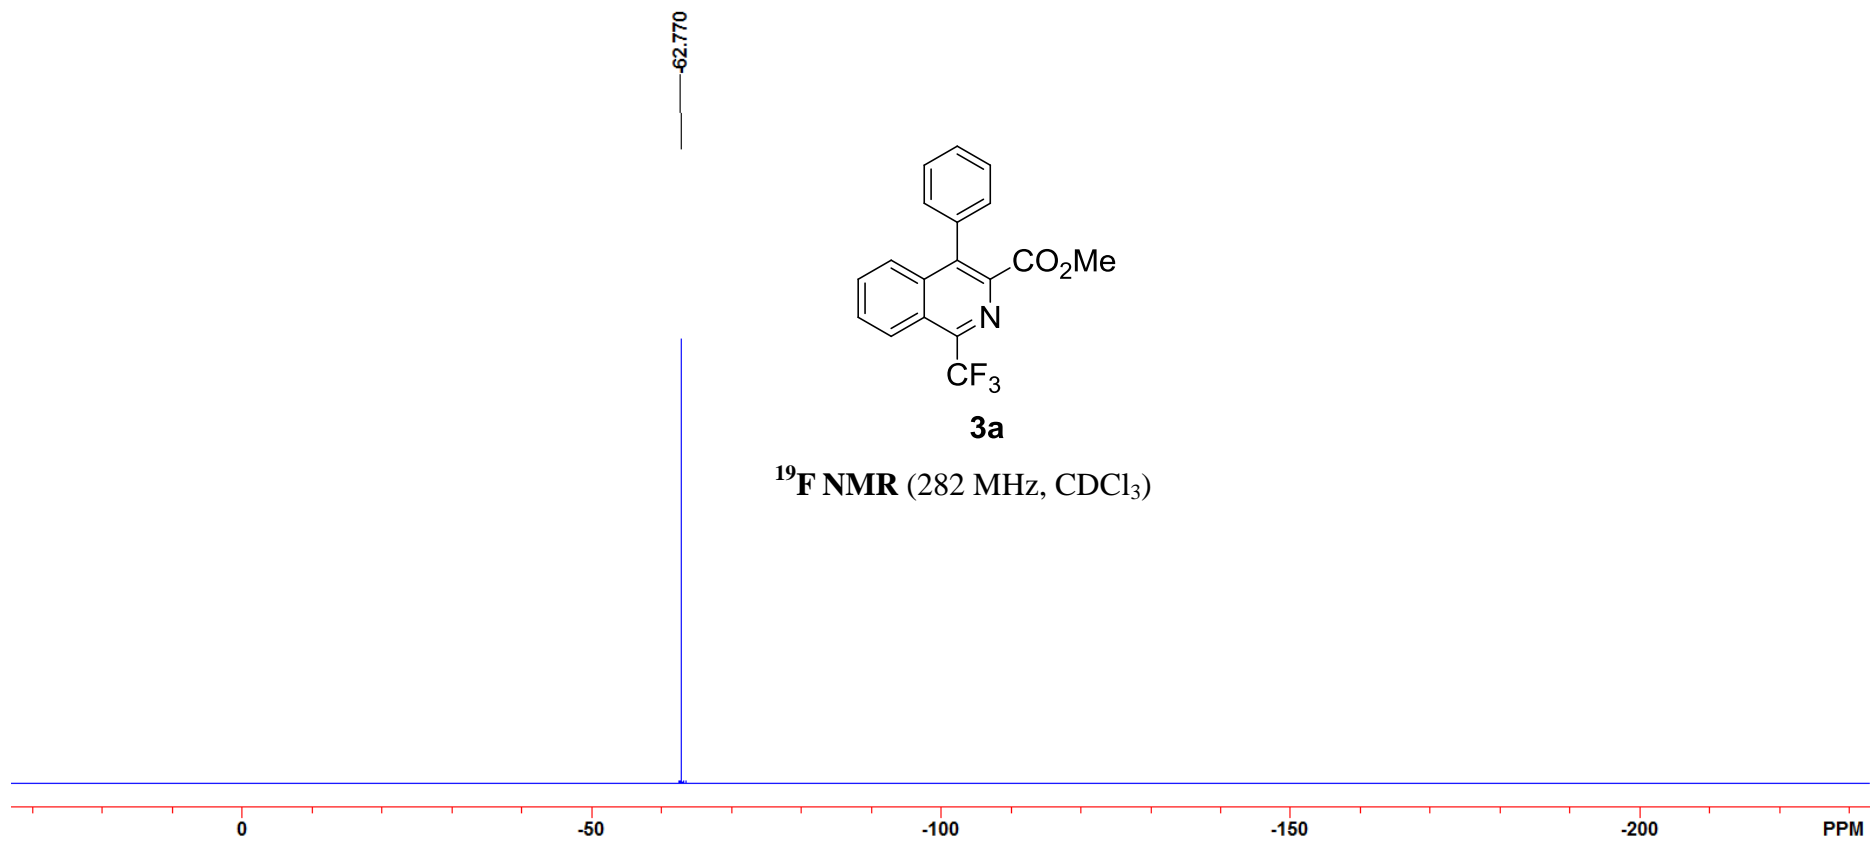

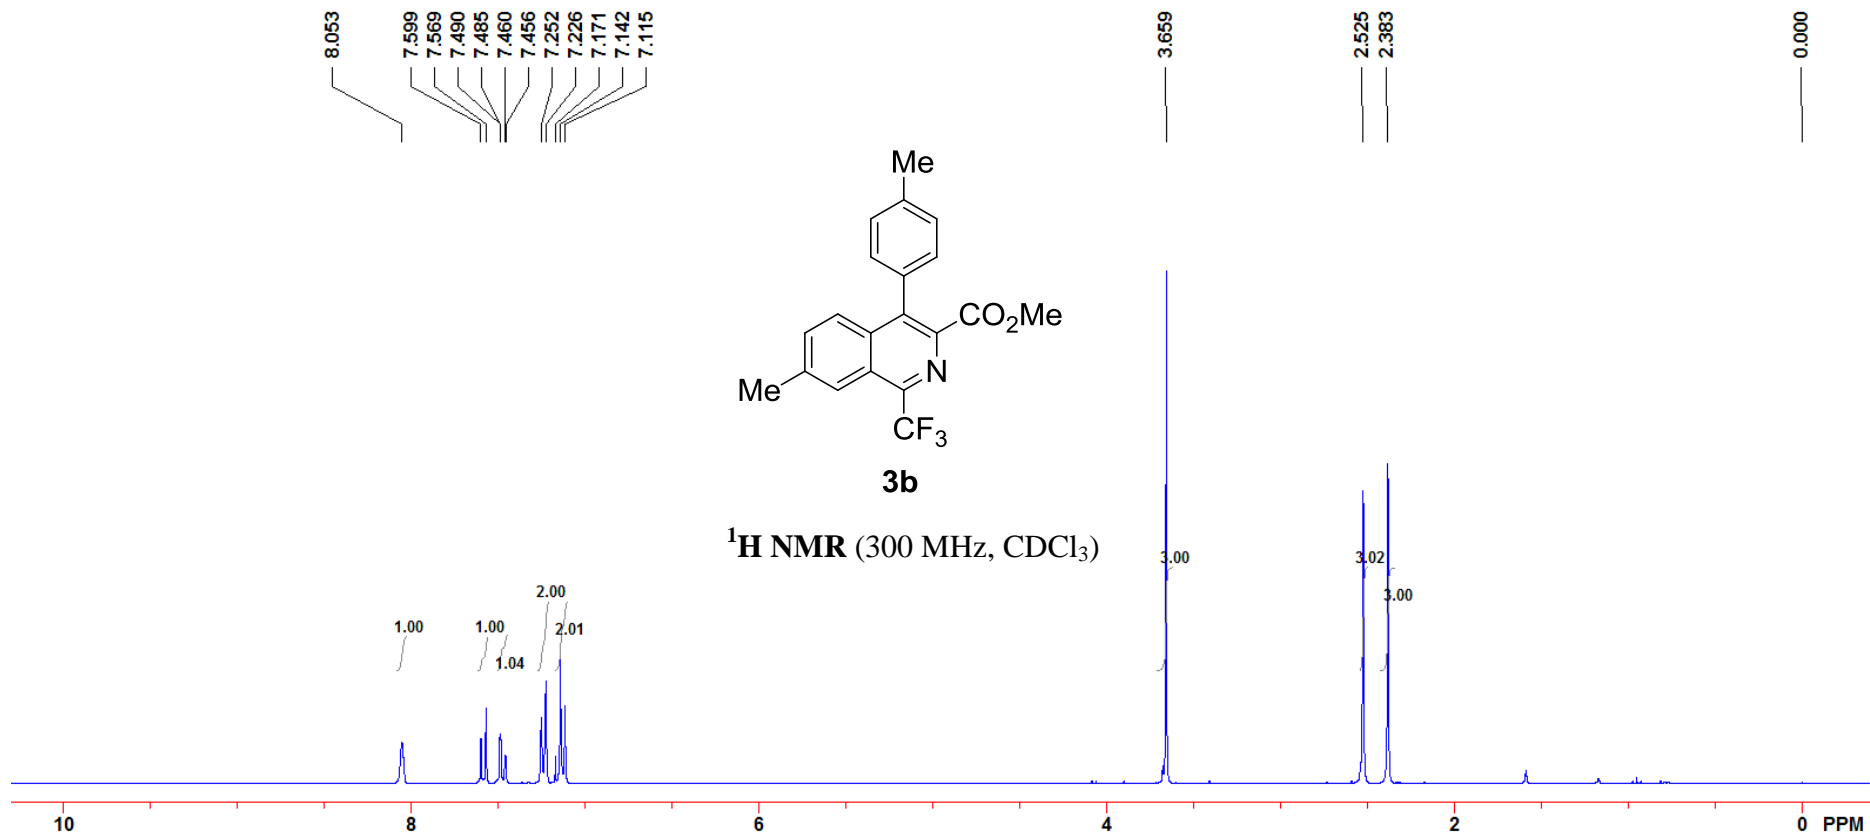



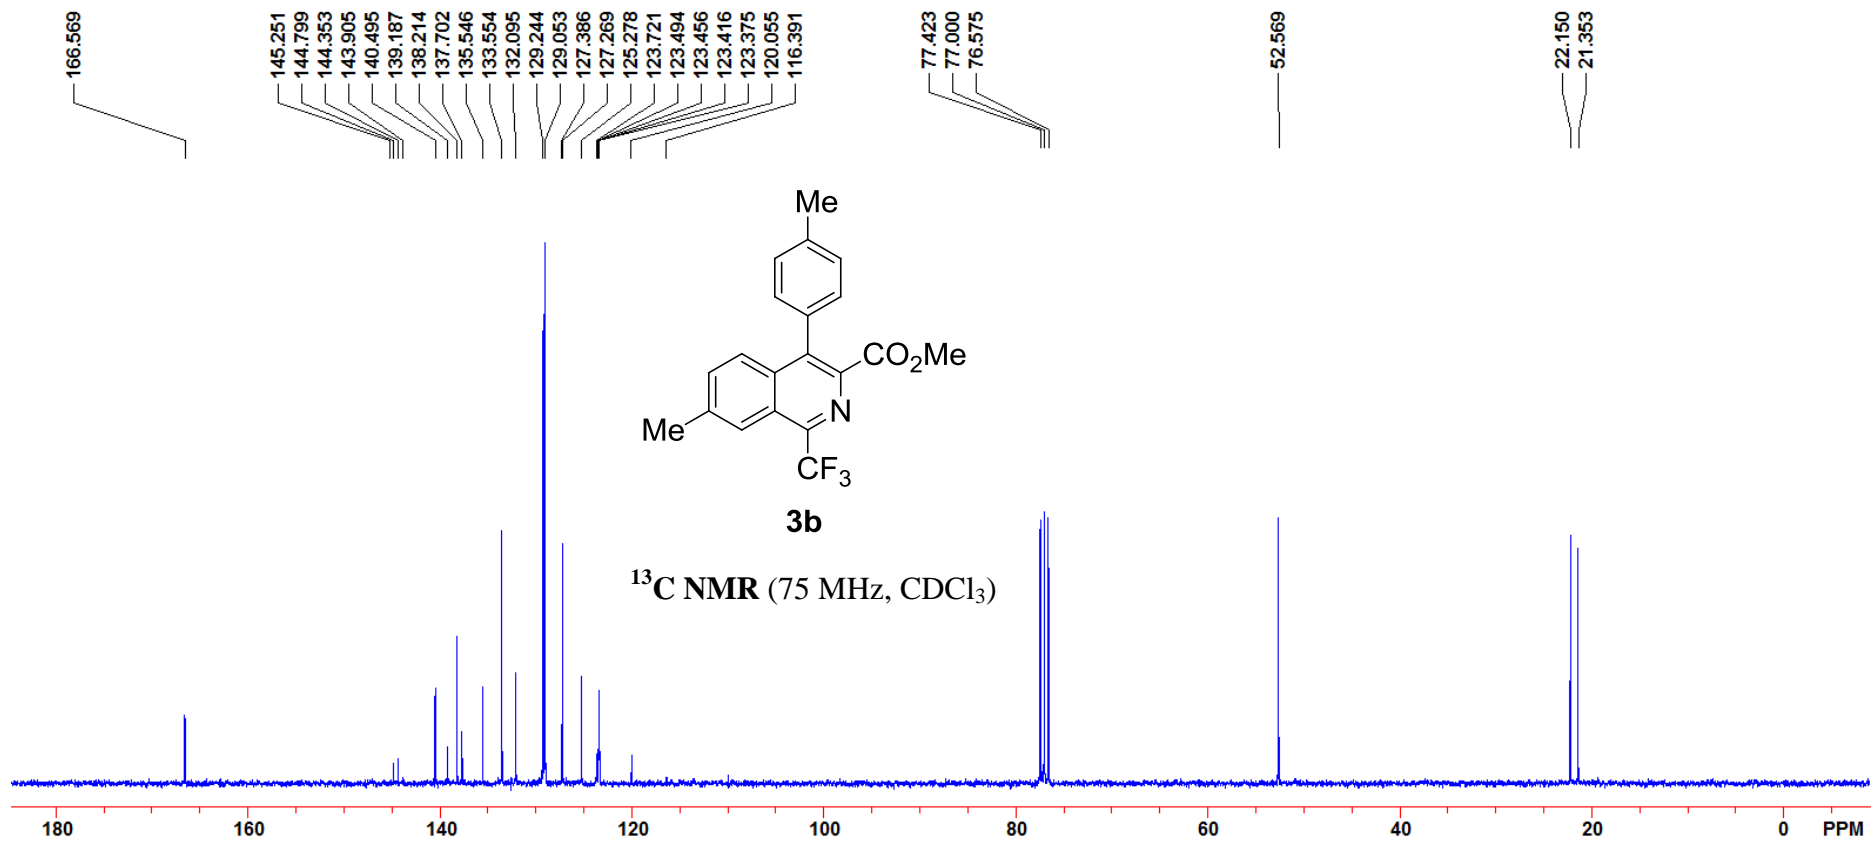

-62.830

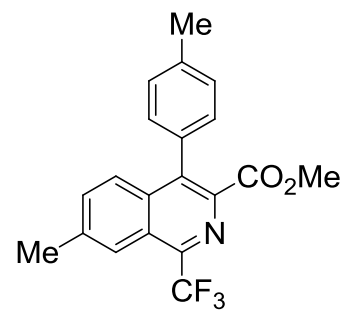

**3b**

**<sup>19</sup>F NMR (282 MHz, CDCl<sub>3</sub>)**

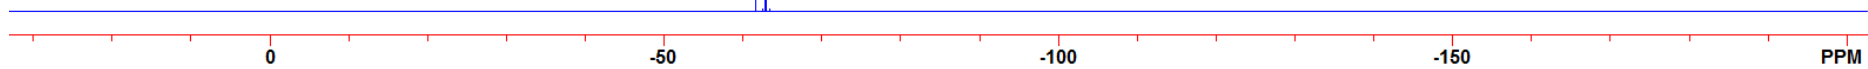

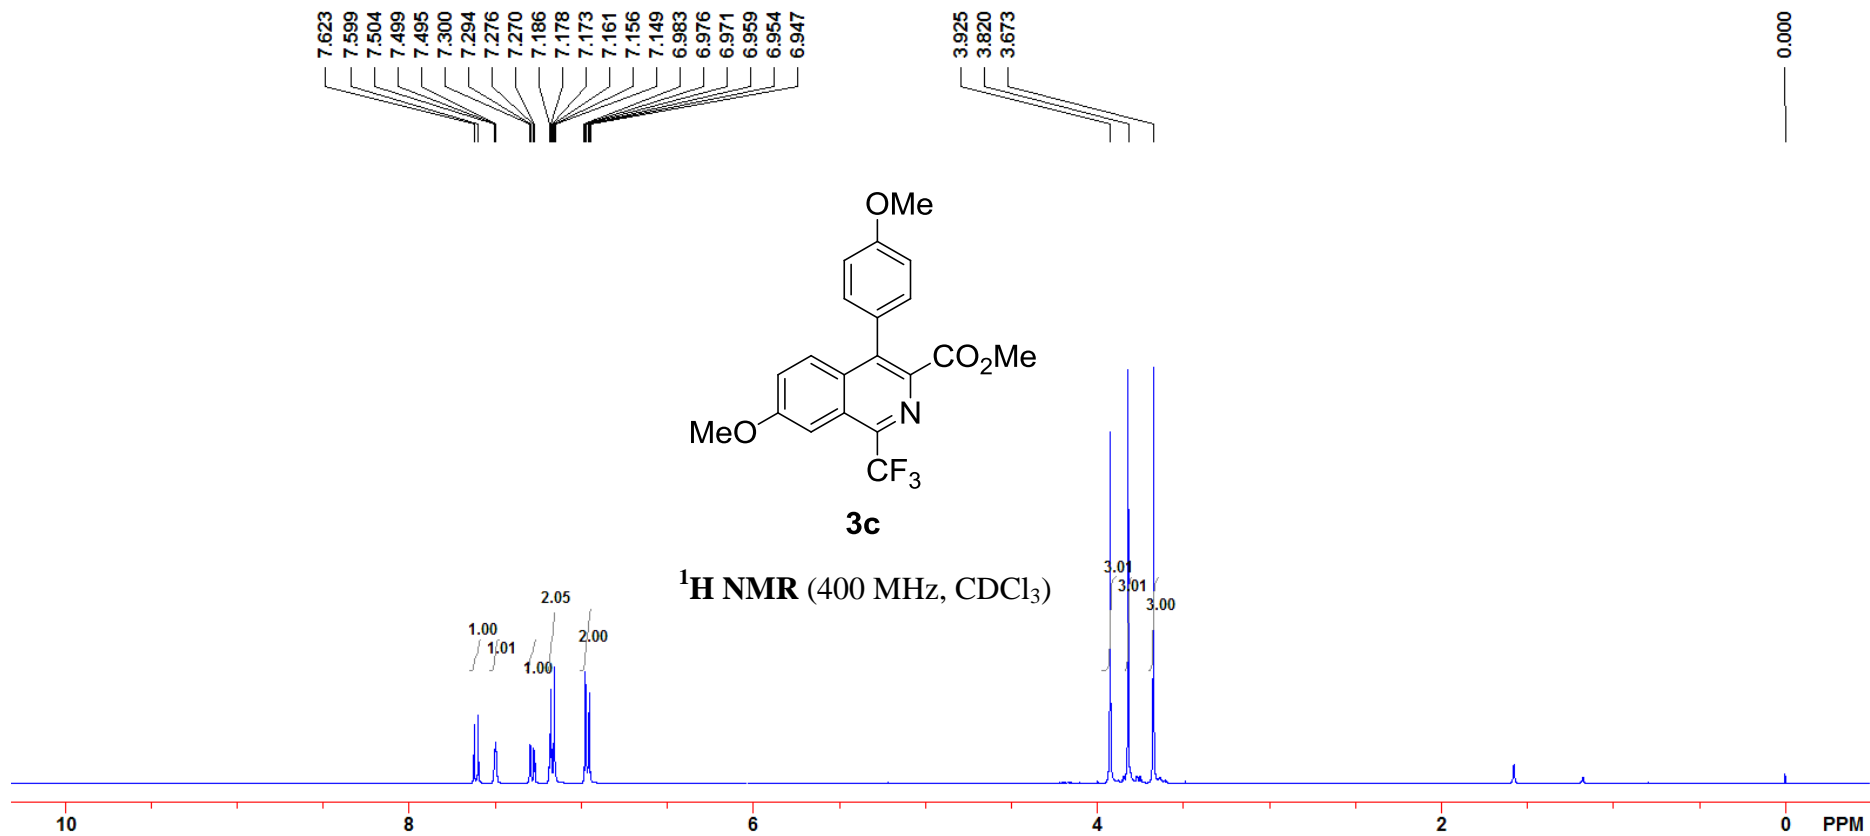

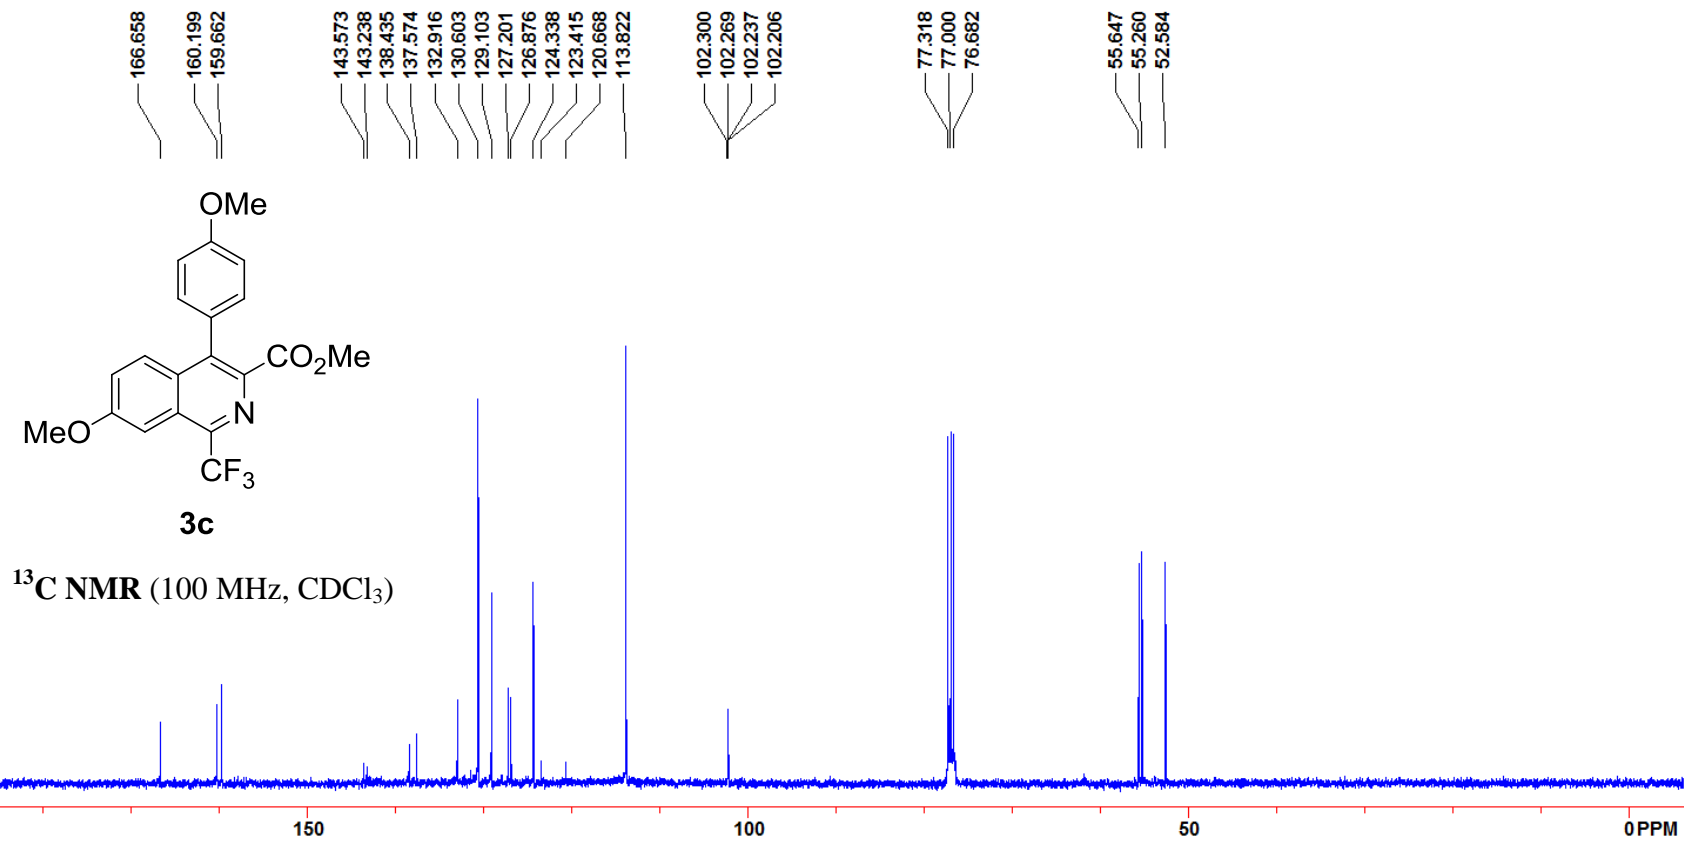

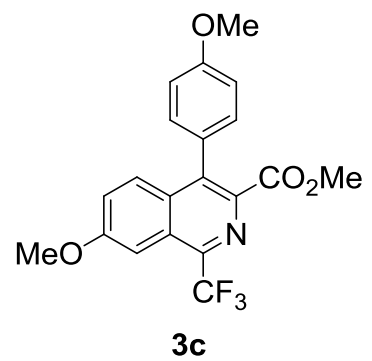

<sup>19</sup>F NMR (282 MHz, CDCl<sub>3</sub>)

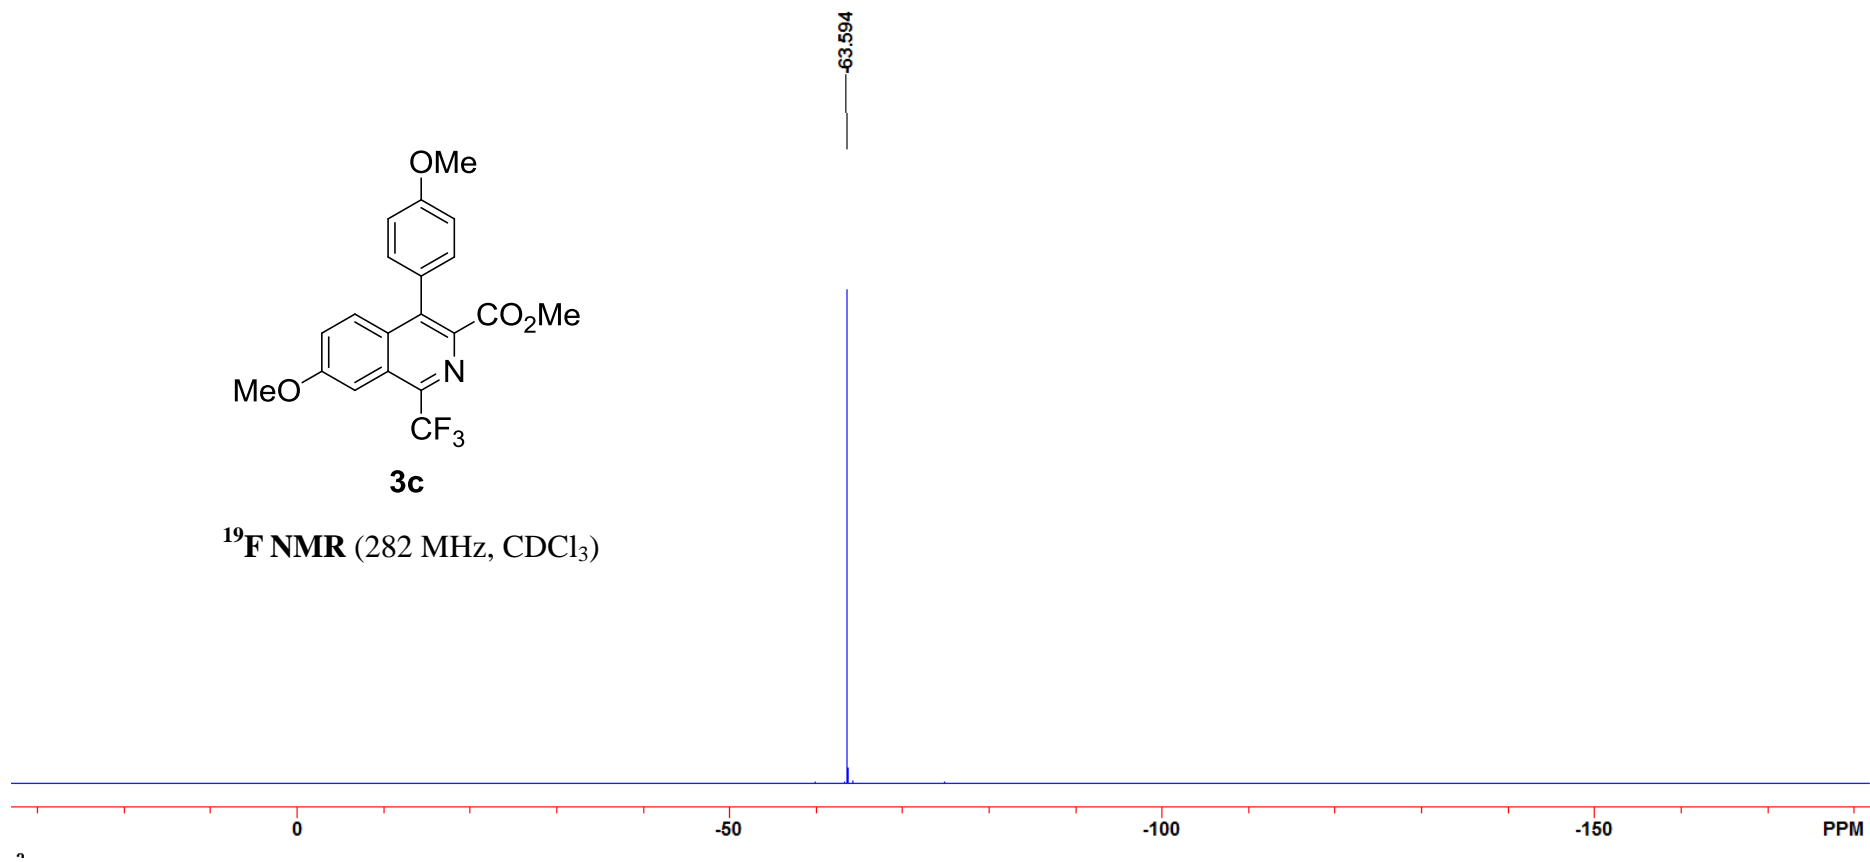

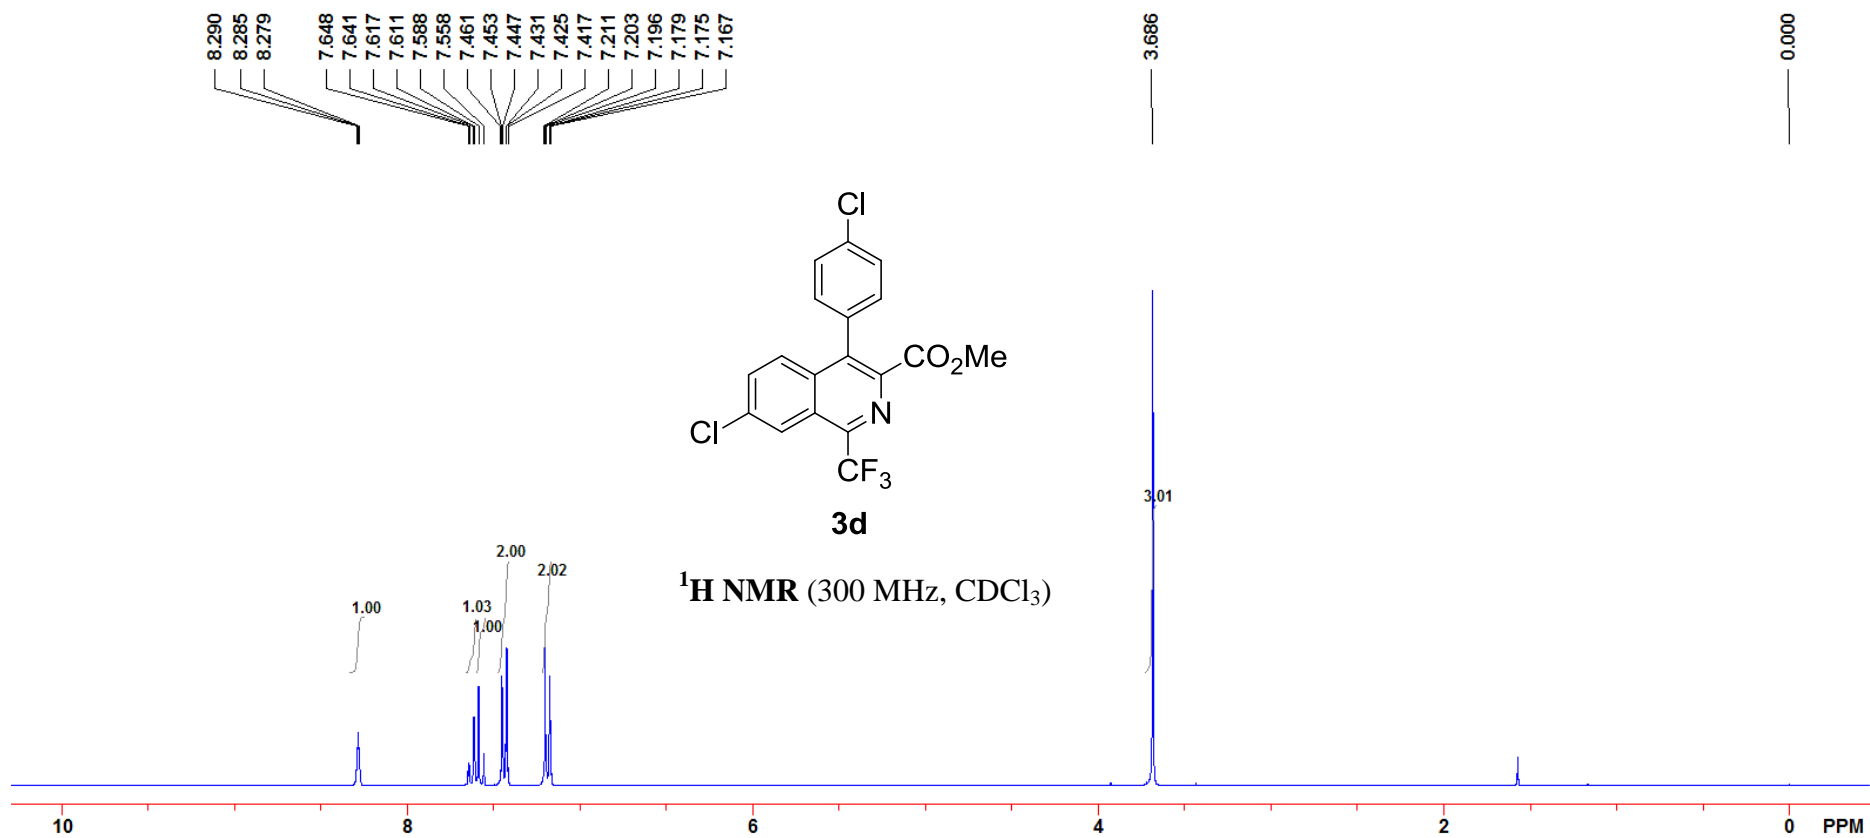

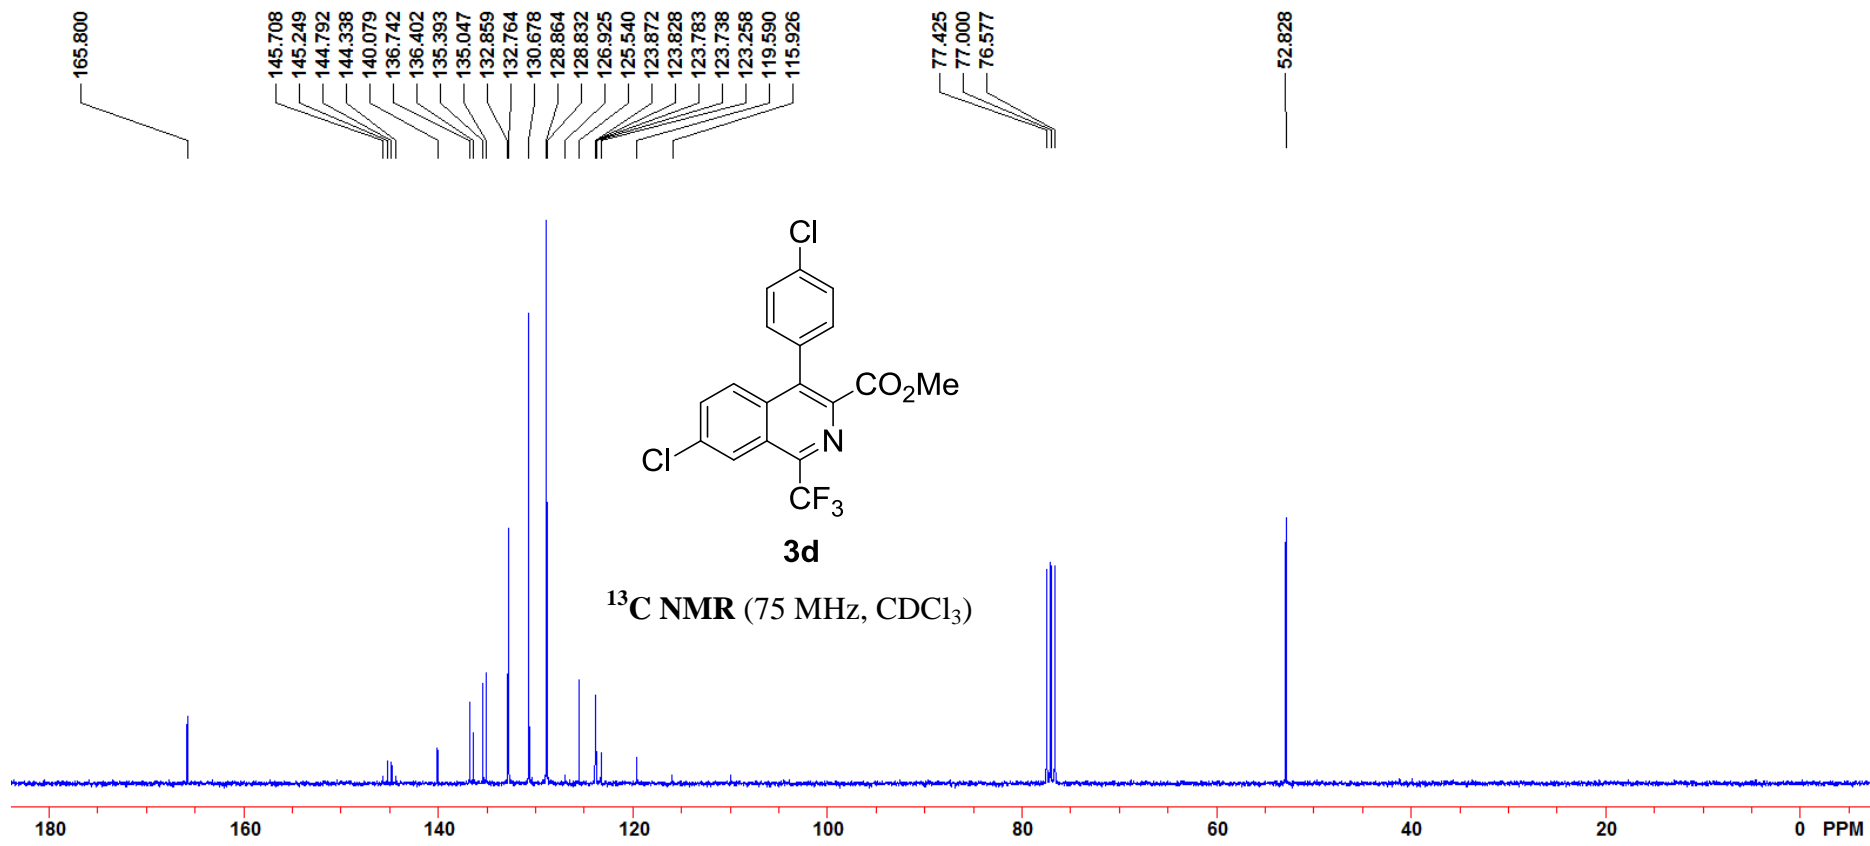

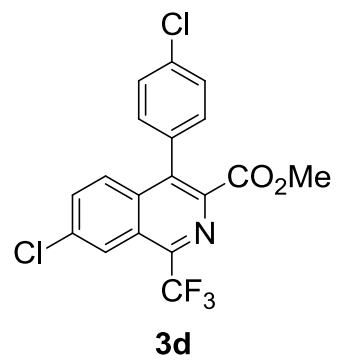

$^{19}\text{F}$  NMR (282 MHz,  $\text{CDCl}_3$ )

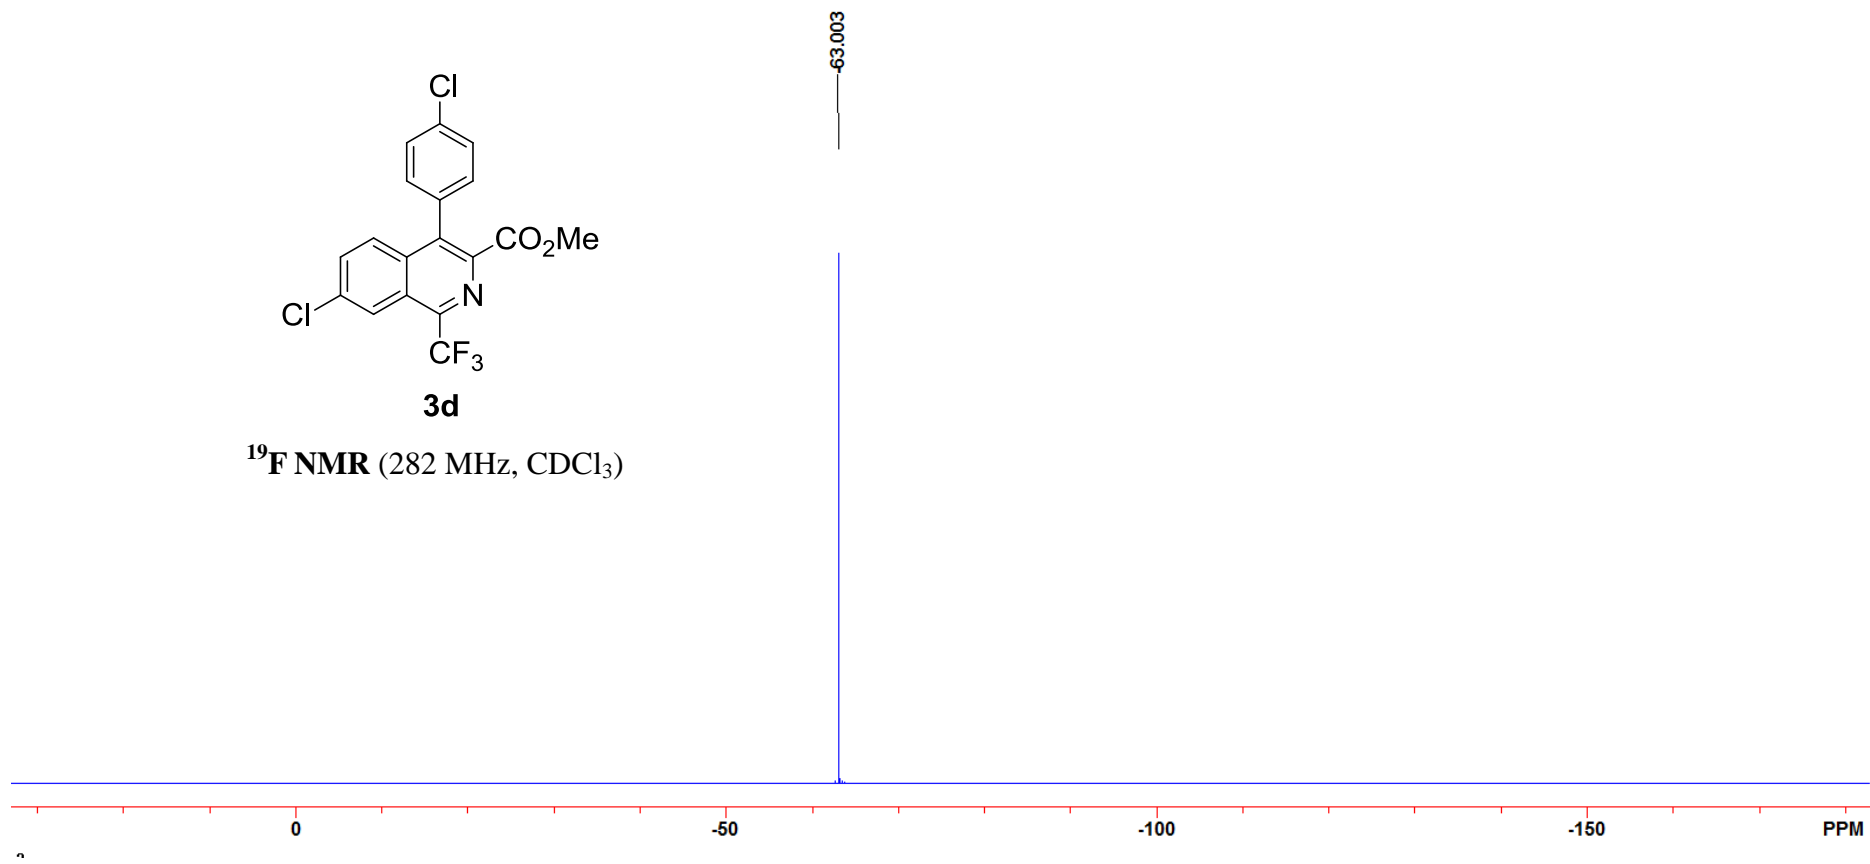



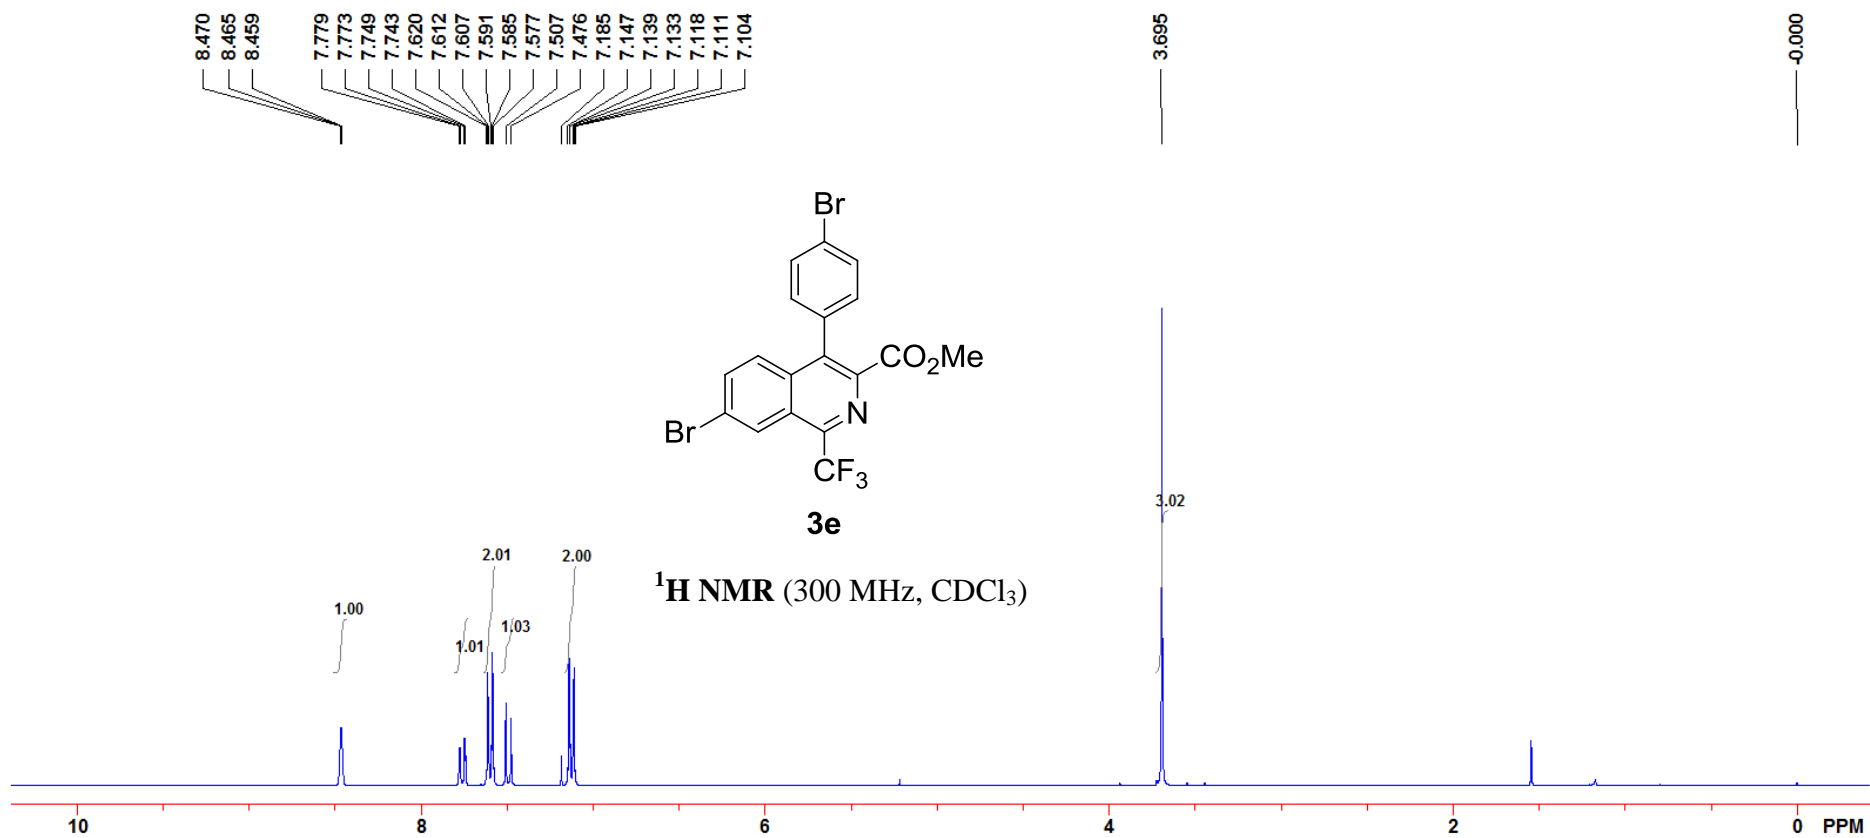

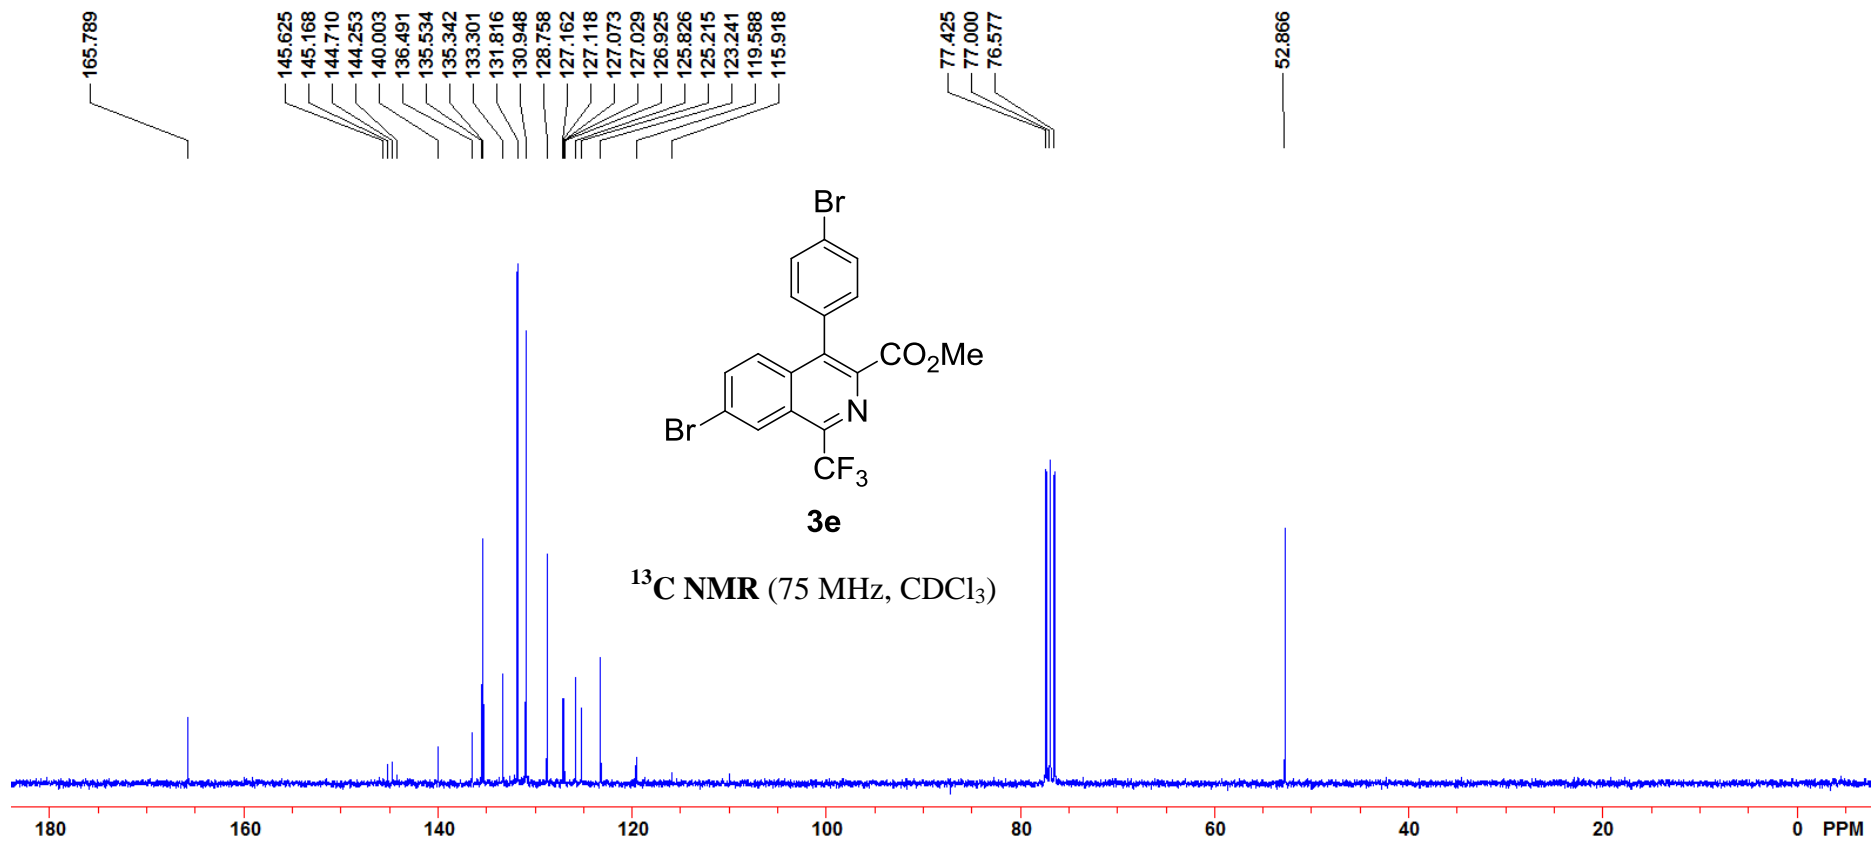

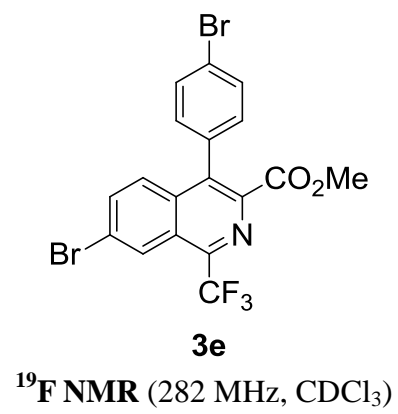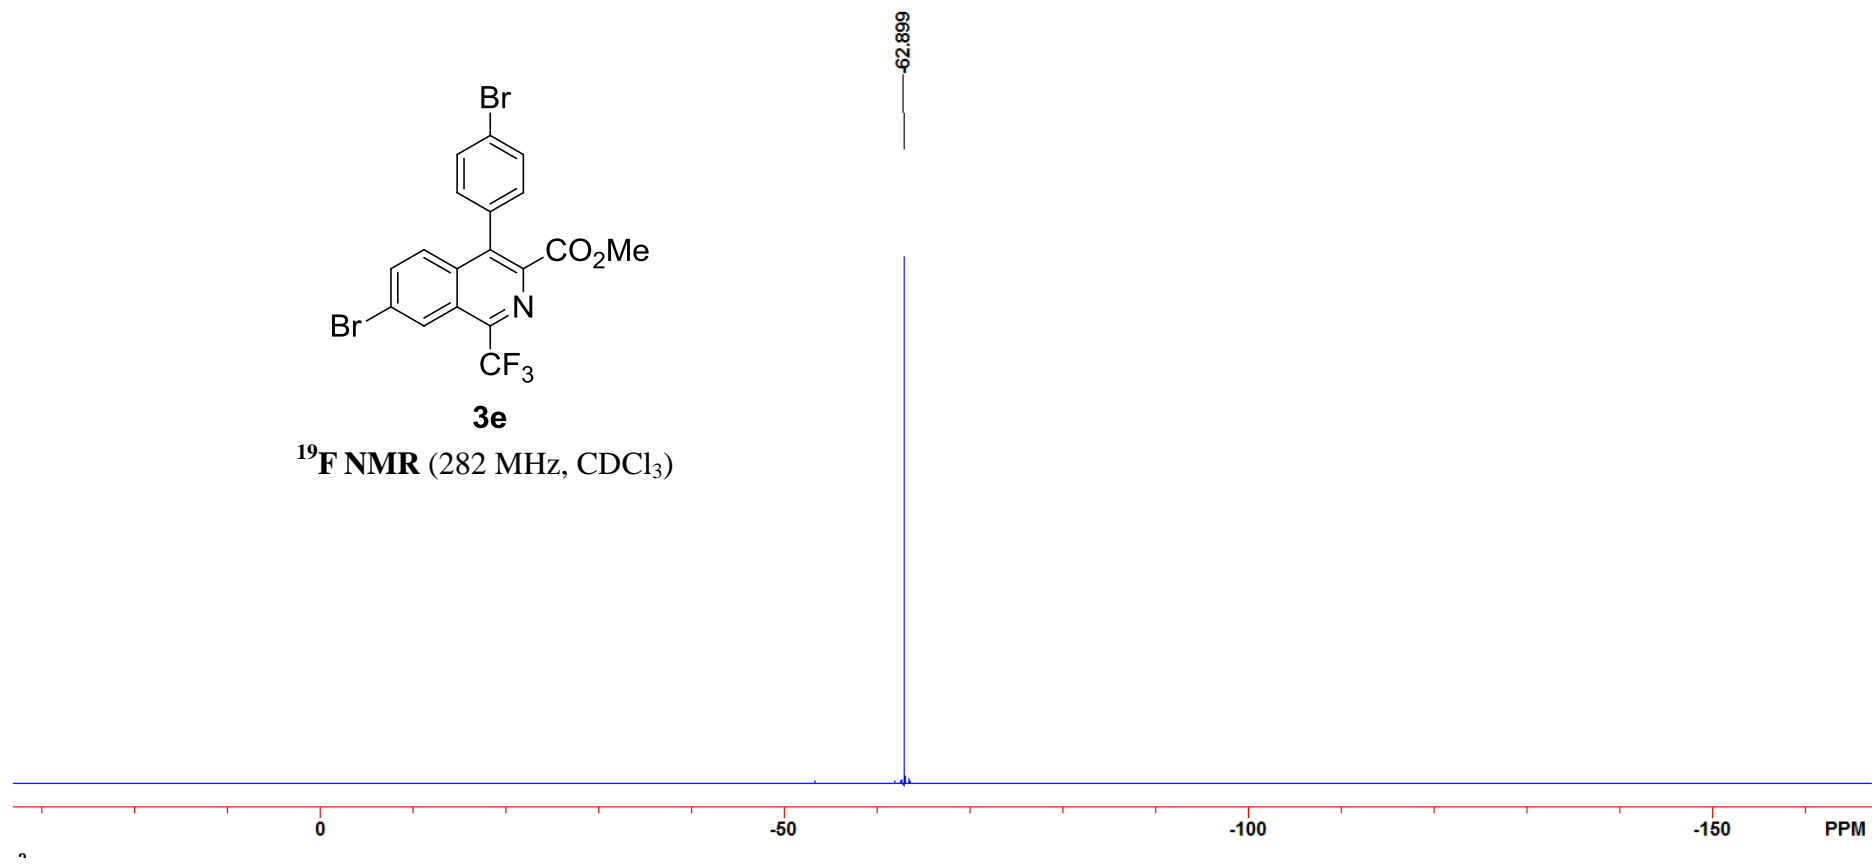

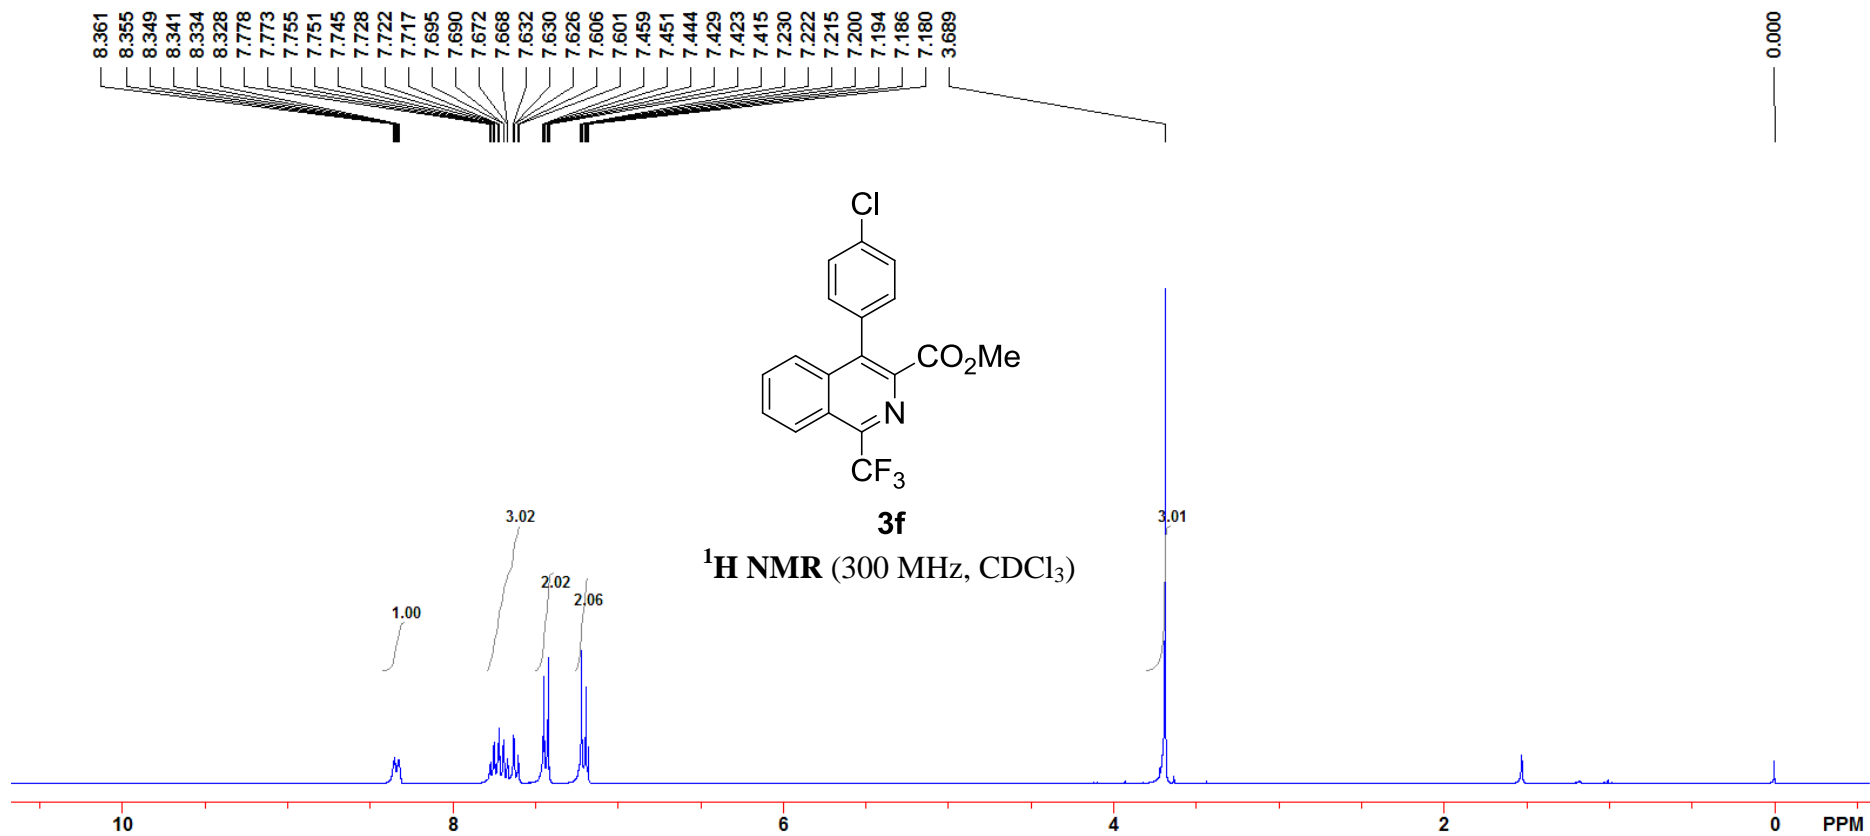

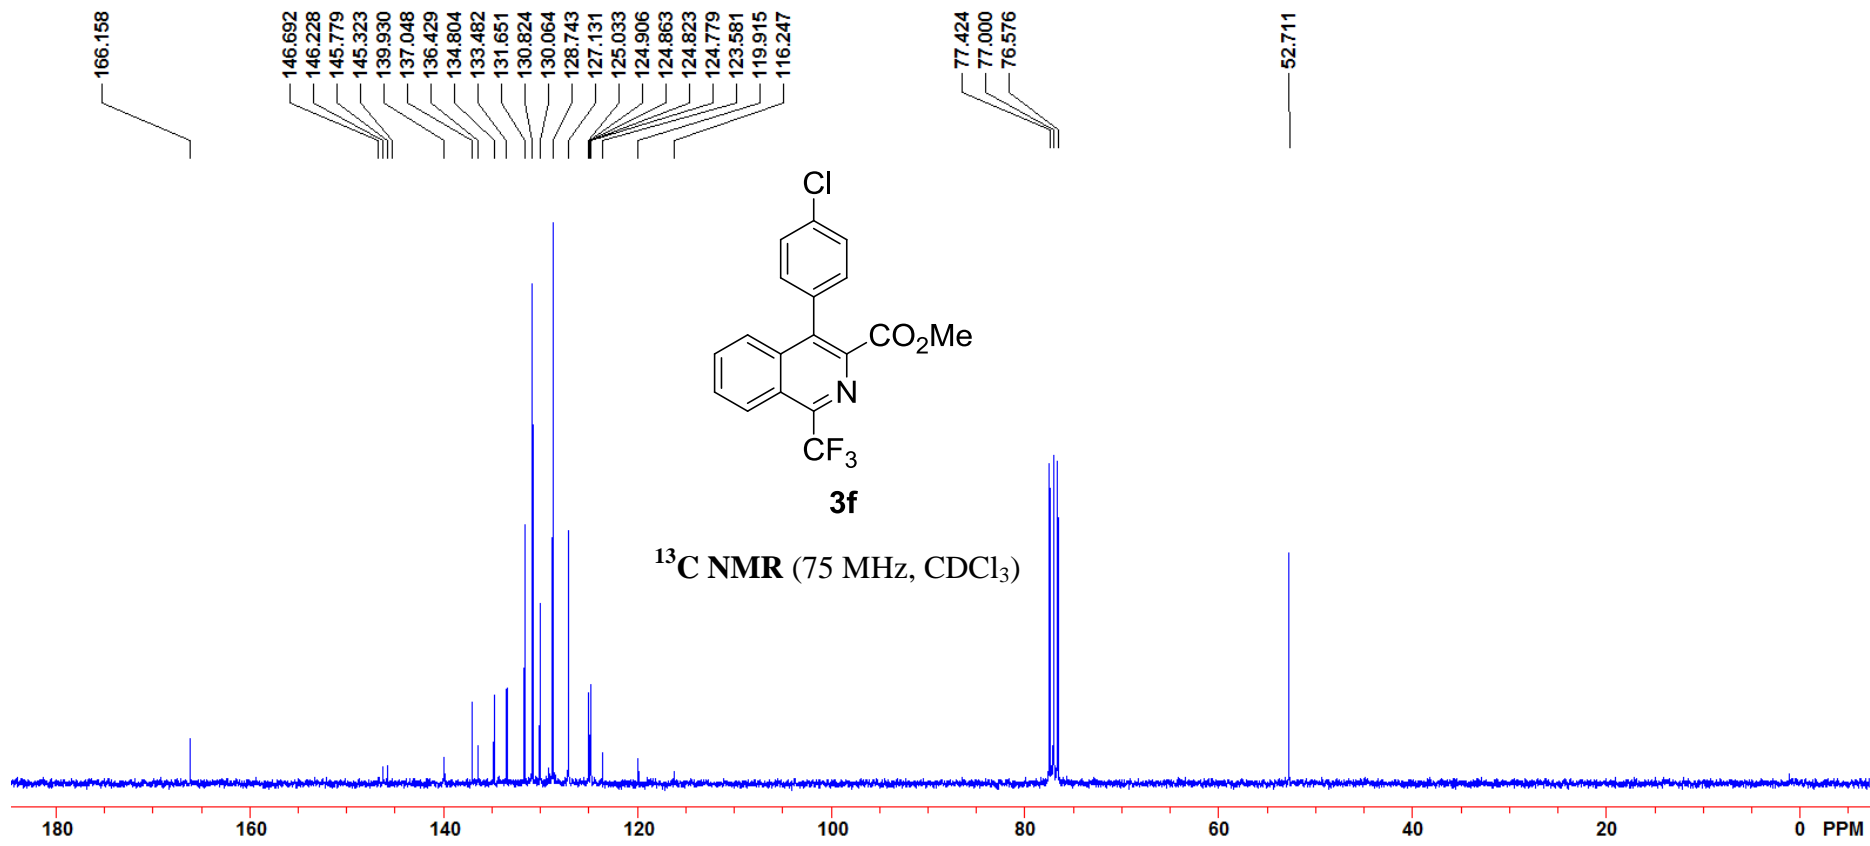

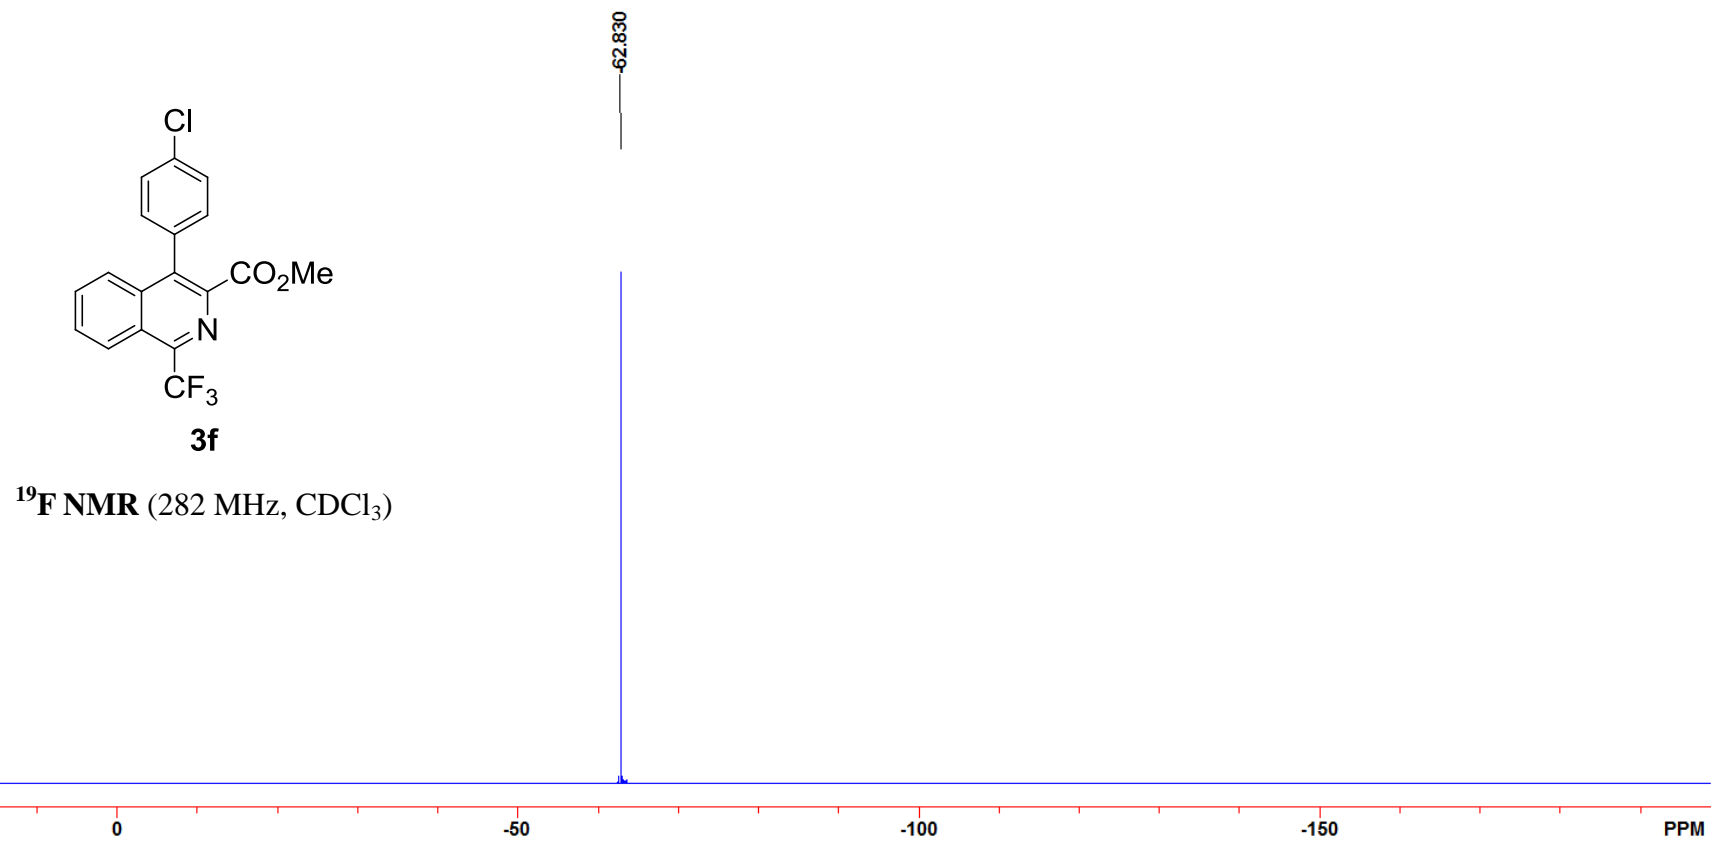

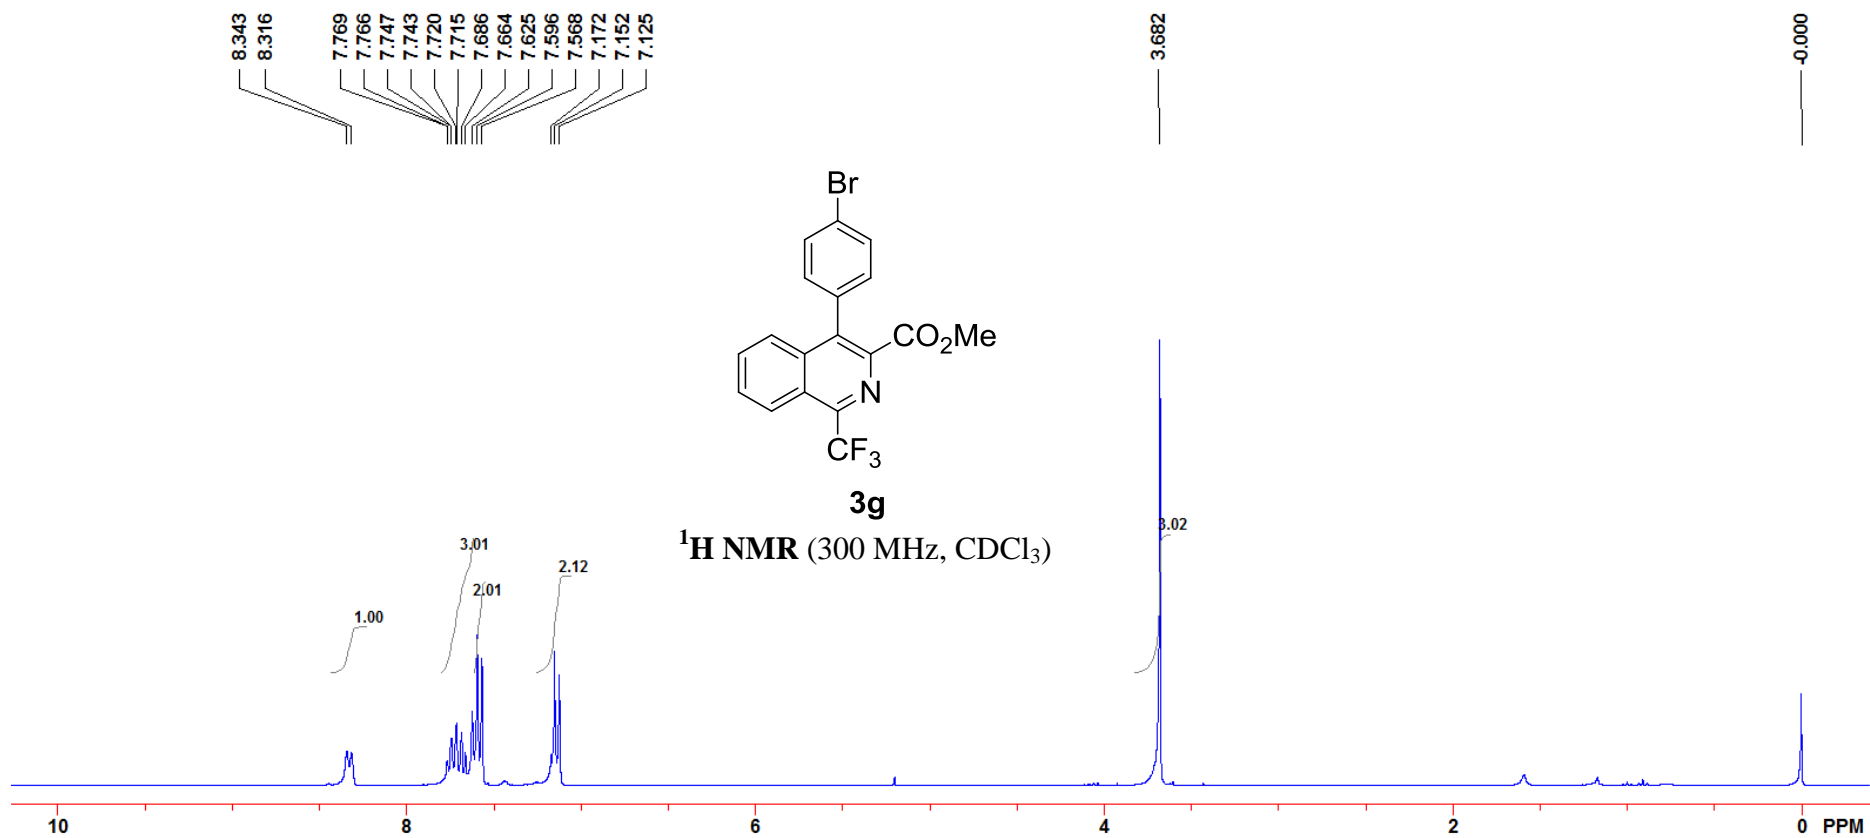

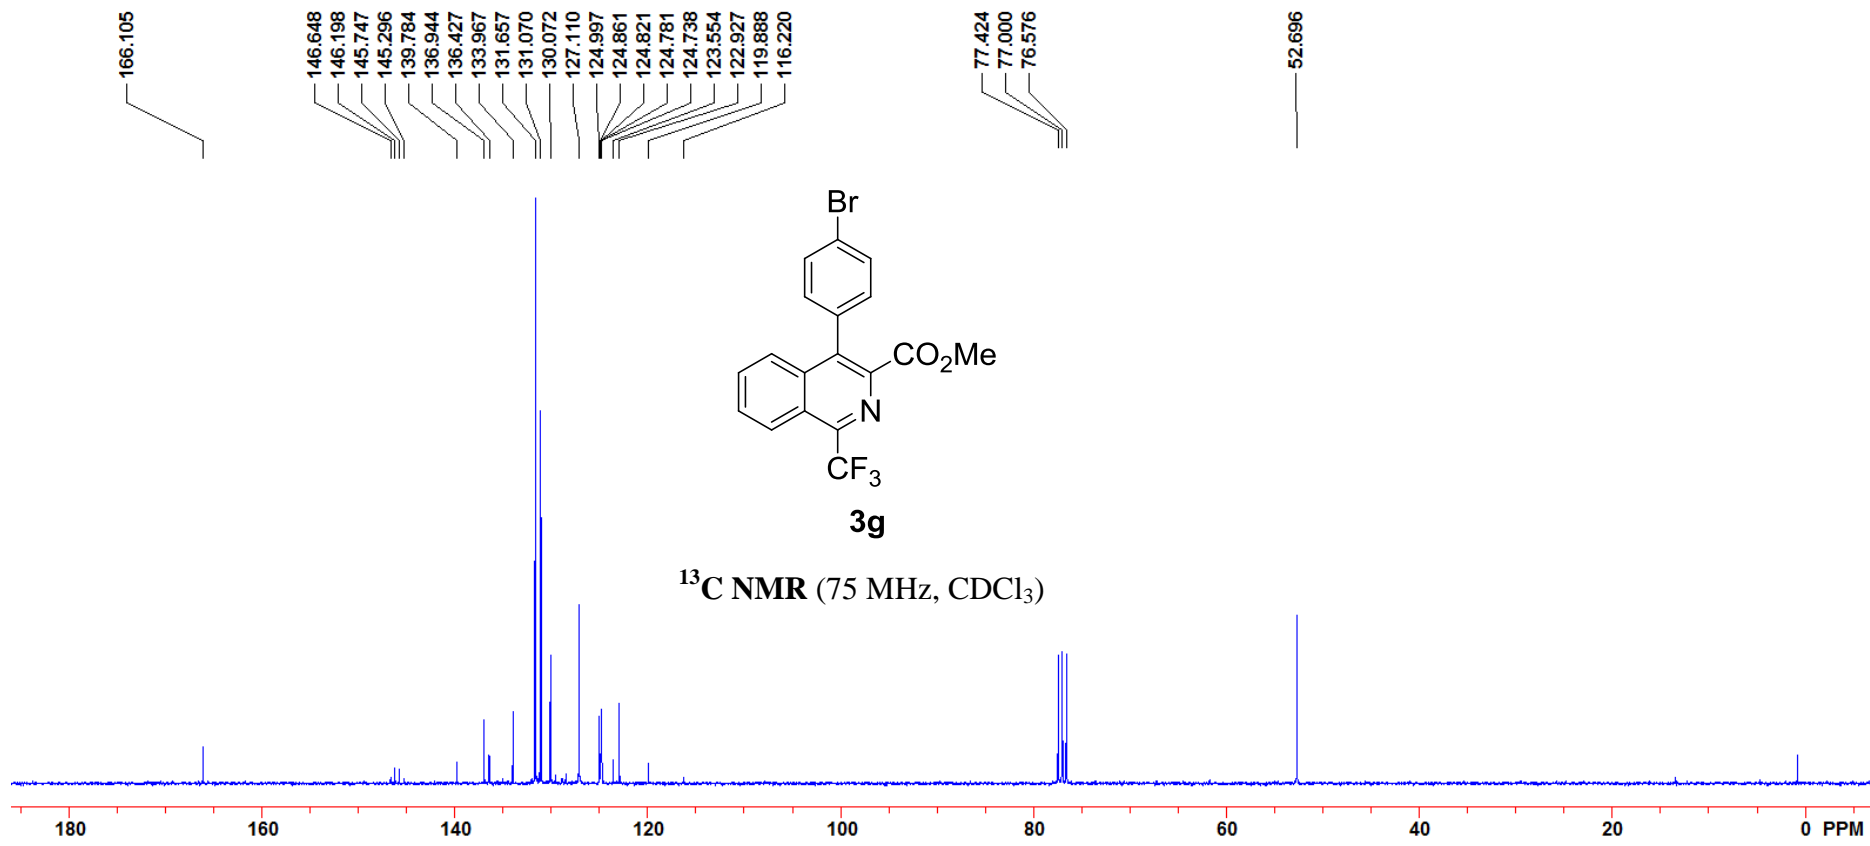



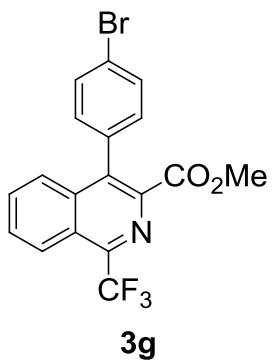

$^{19}\text{F}$  NMR (282 MHz,  $\text{CDCl}_3$ )

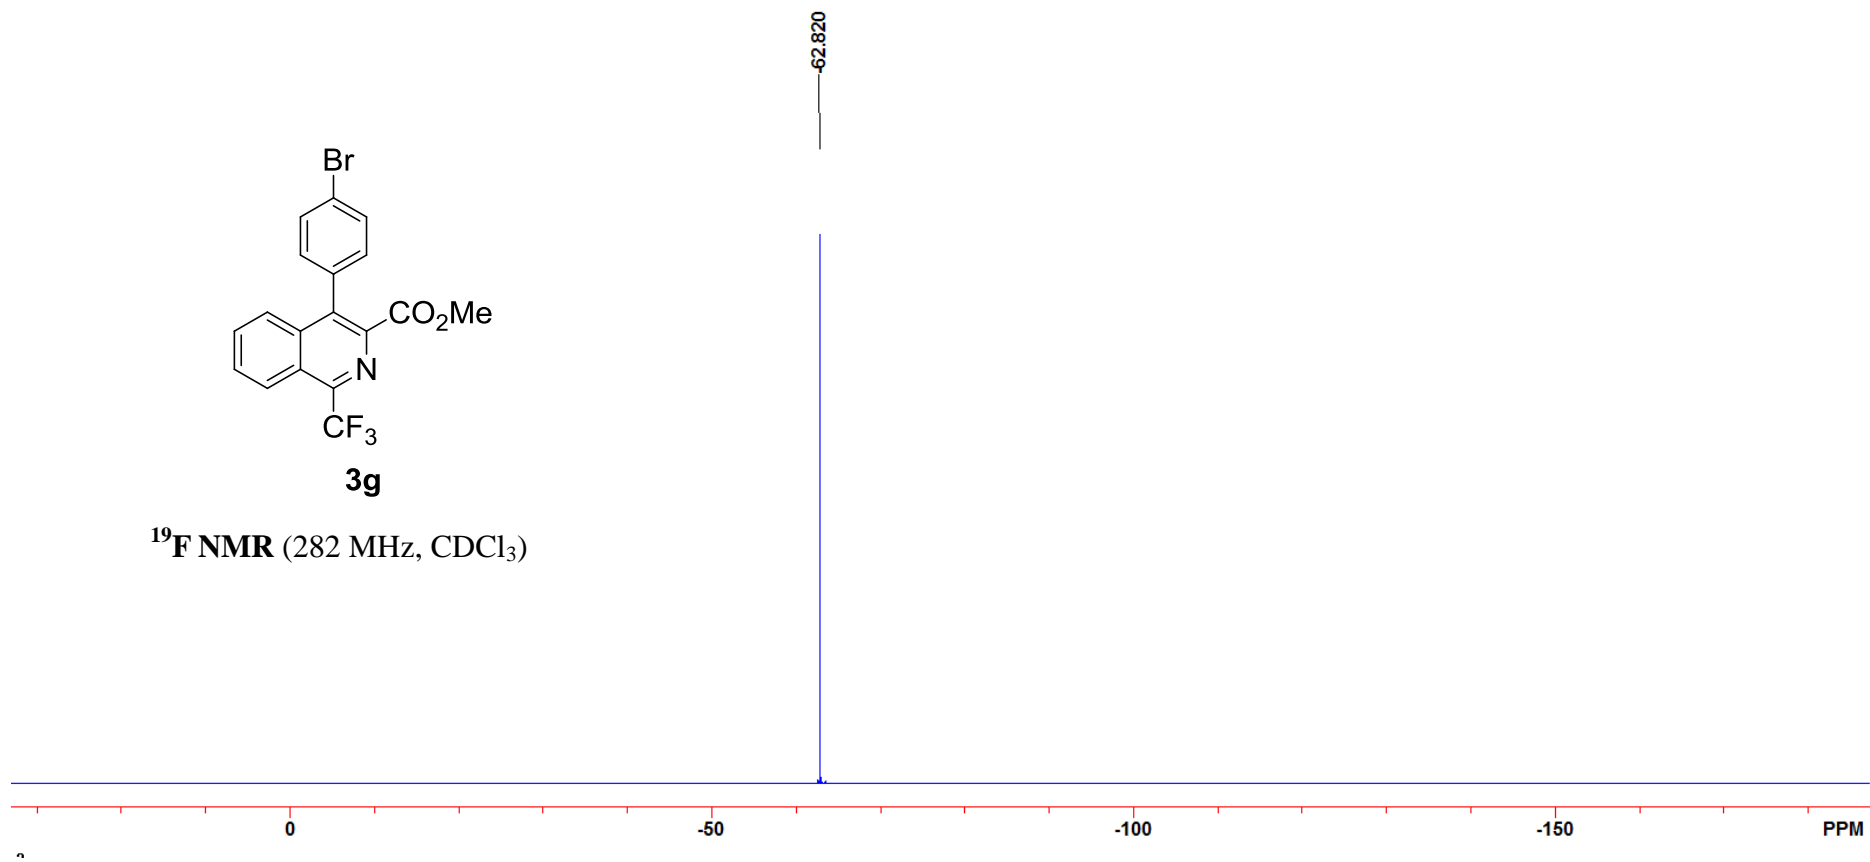

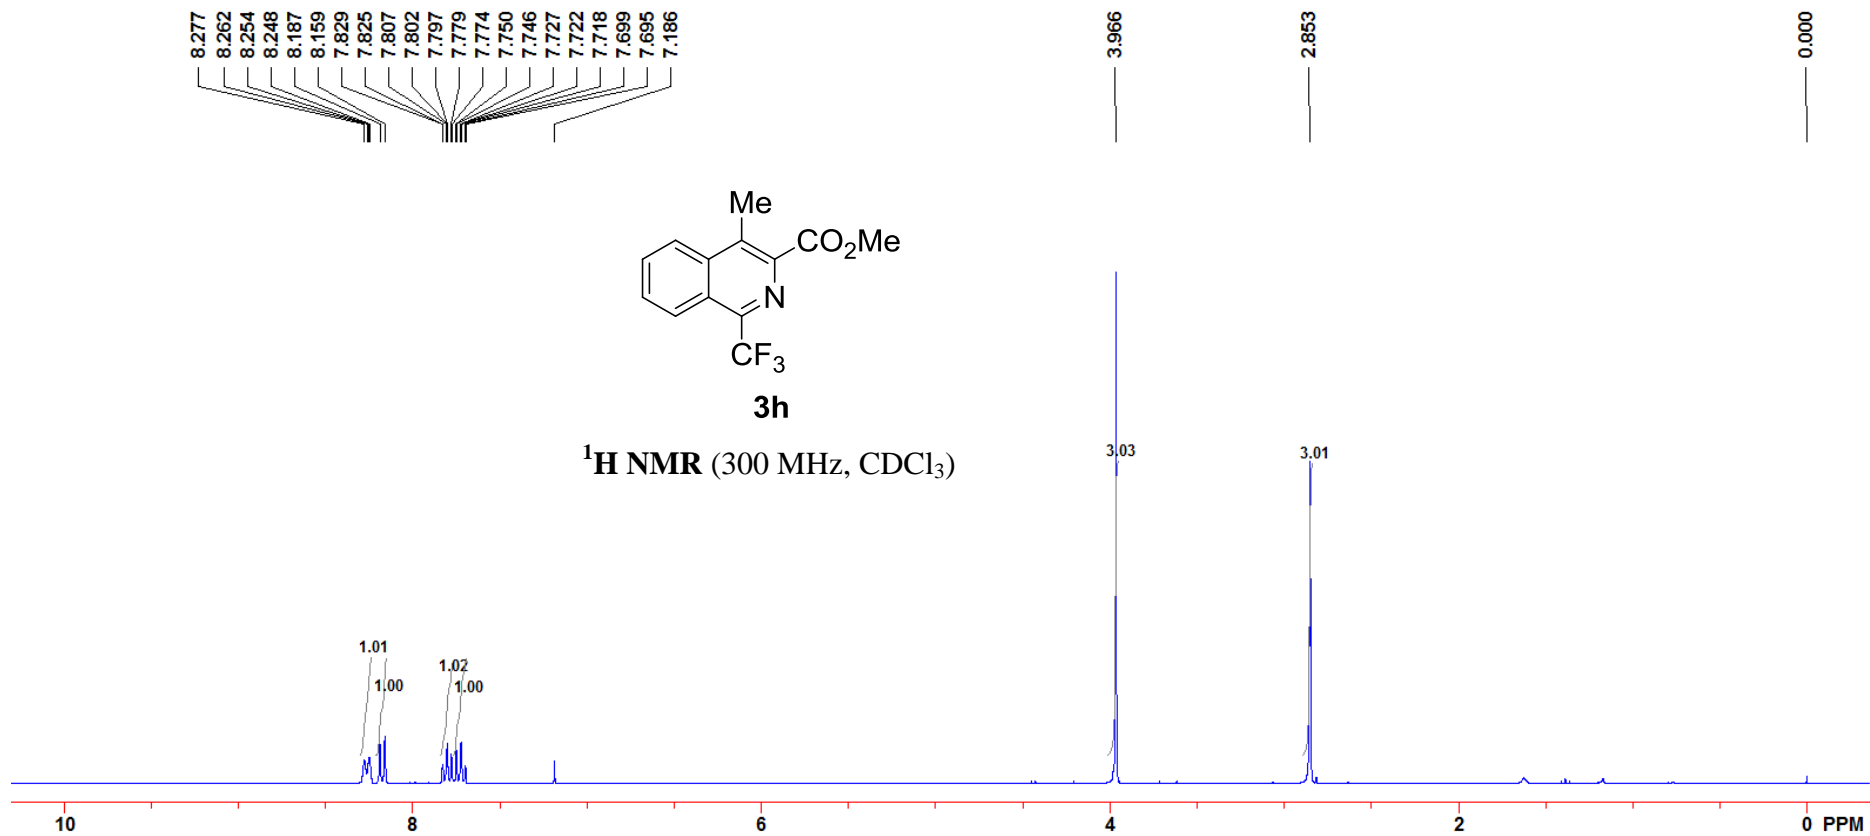

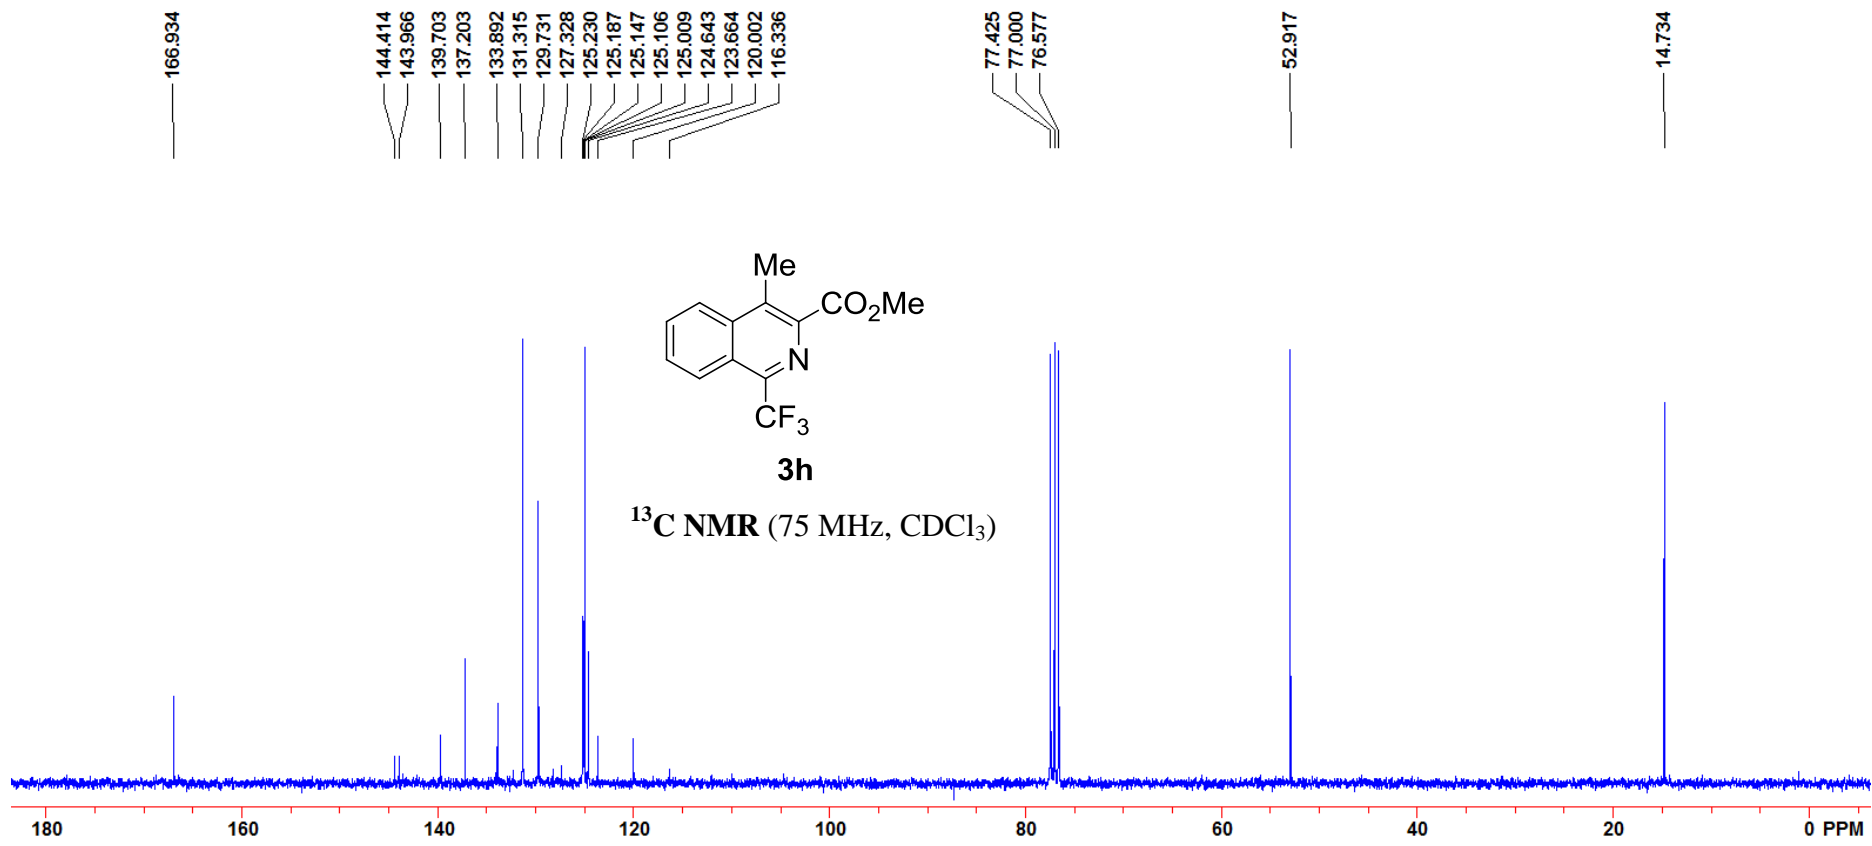

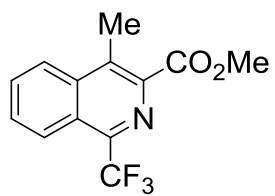

**3h**

<sup>19</sup>F NMR (282 MHz, CDCl<sub>3</sub>)

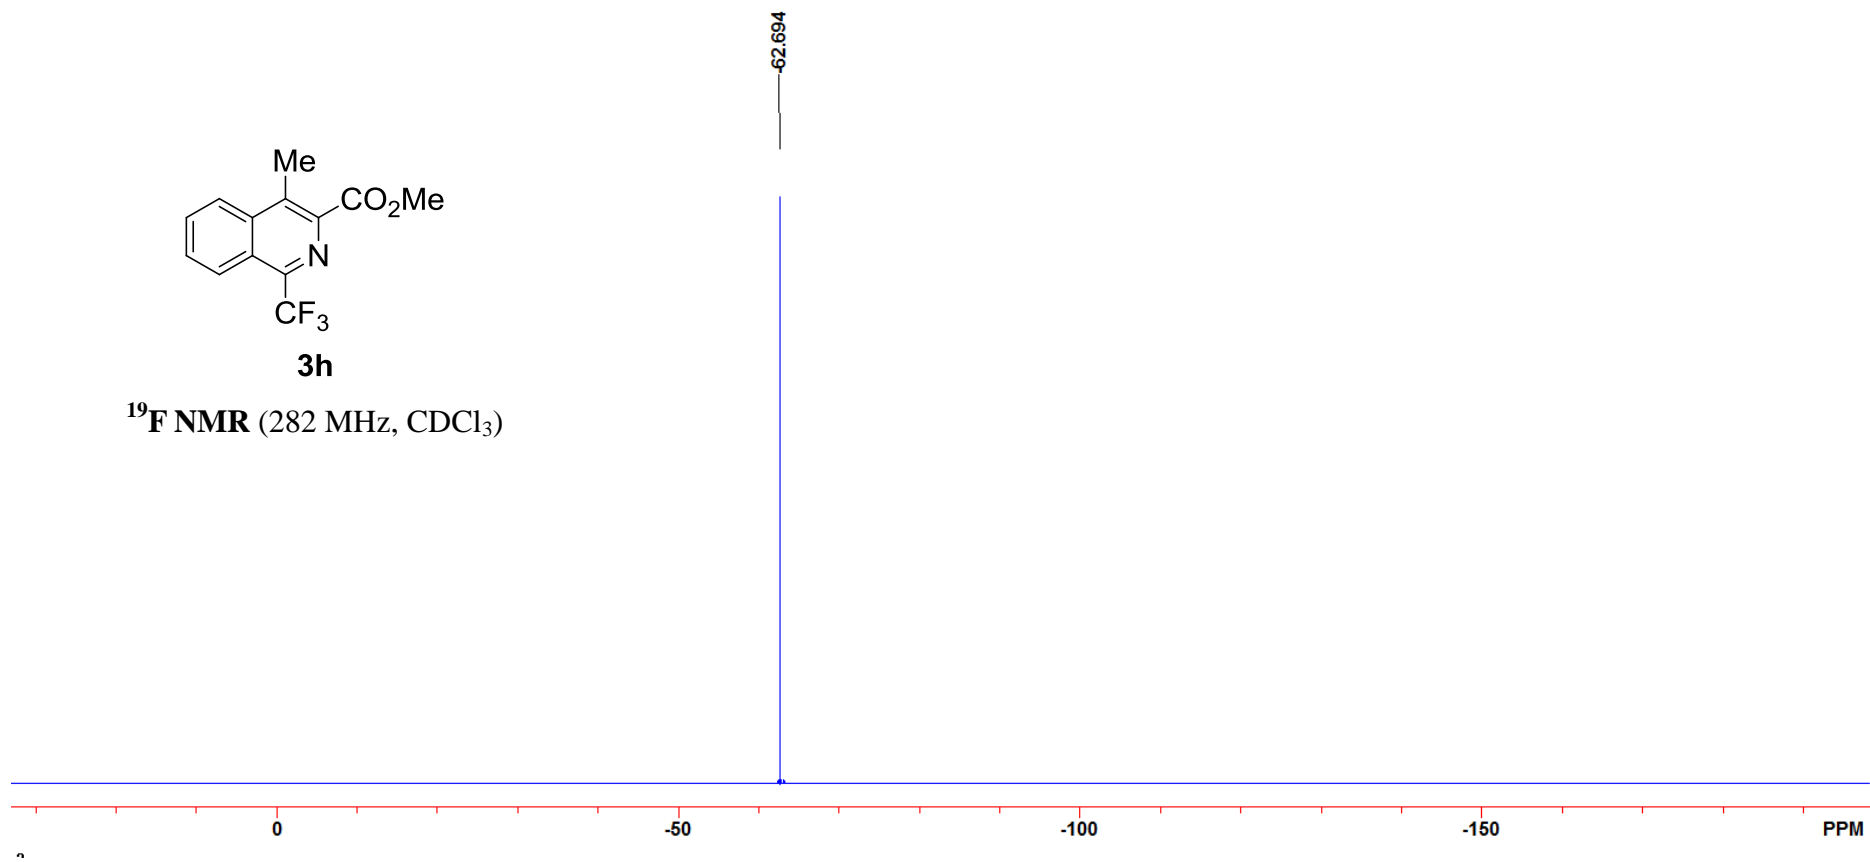

8.070  
8.048  
8.001  
7.633  
7.629  
7.611  
7.607  
7.186

3.957

2.837

2.537

0.000

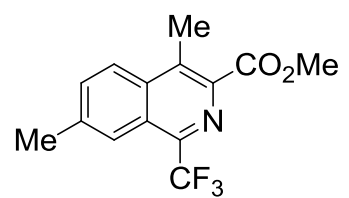

**3i**

<sup>1</sup>H NMR (400 MHz, CDCl<sub>3</sub>)

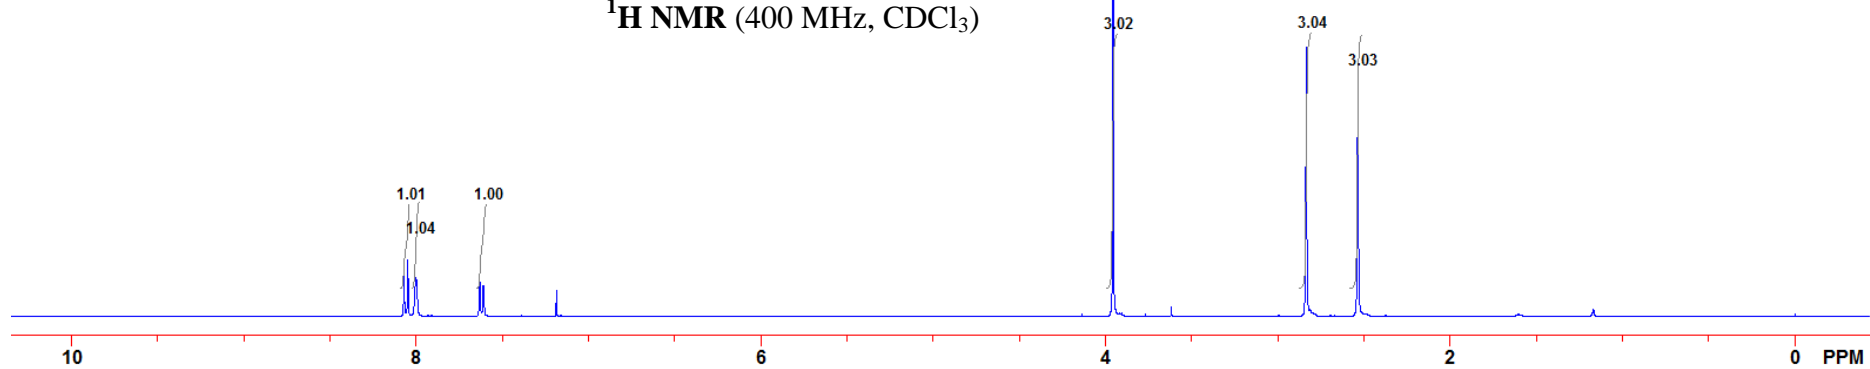

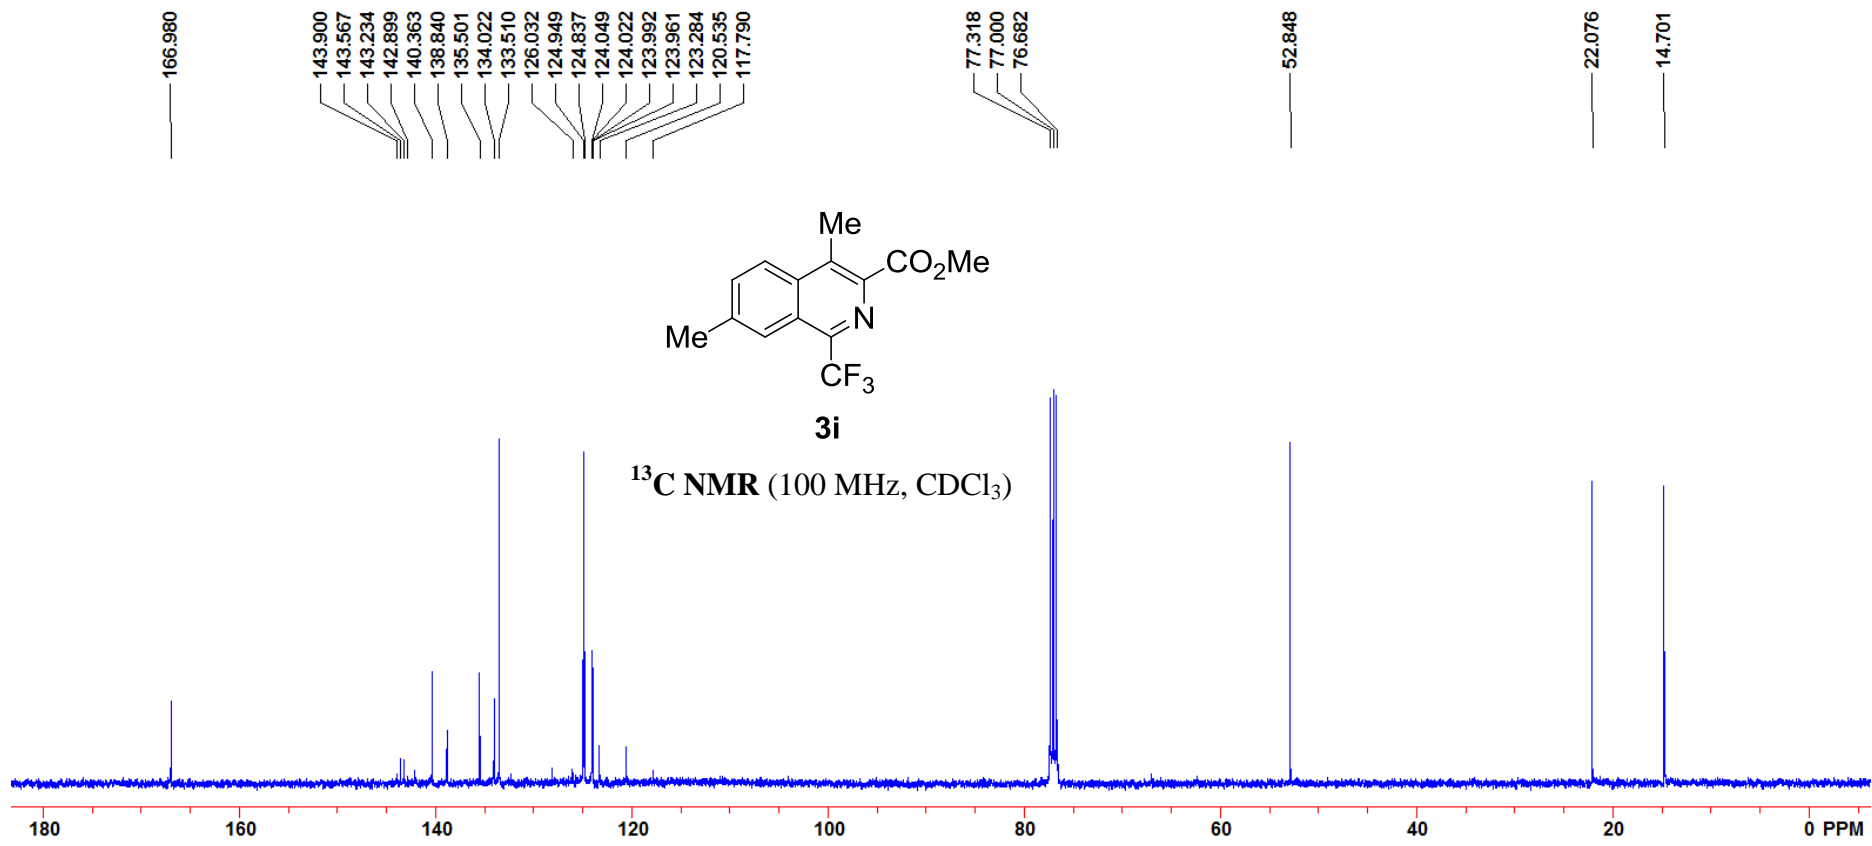

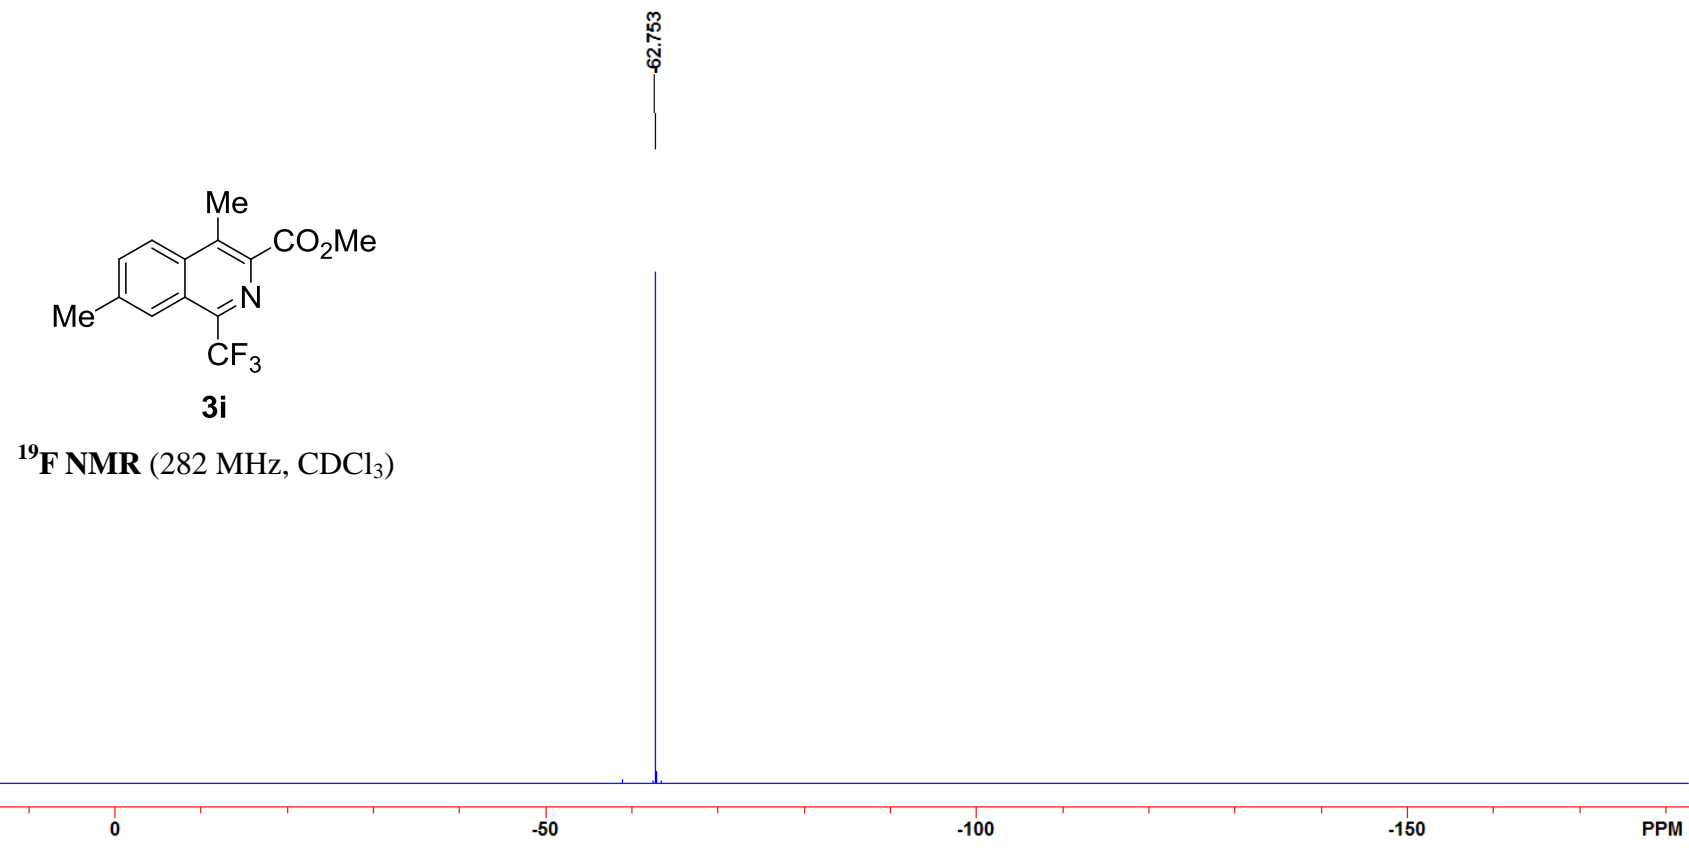

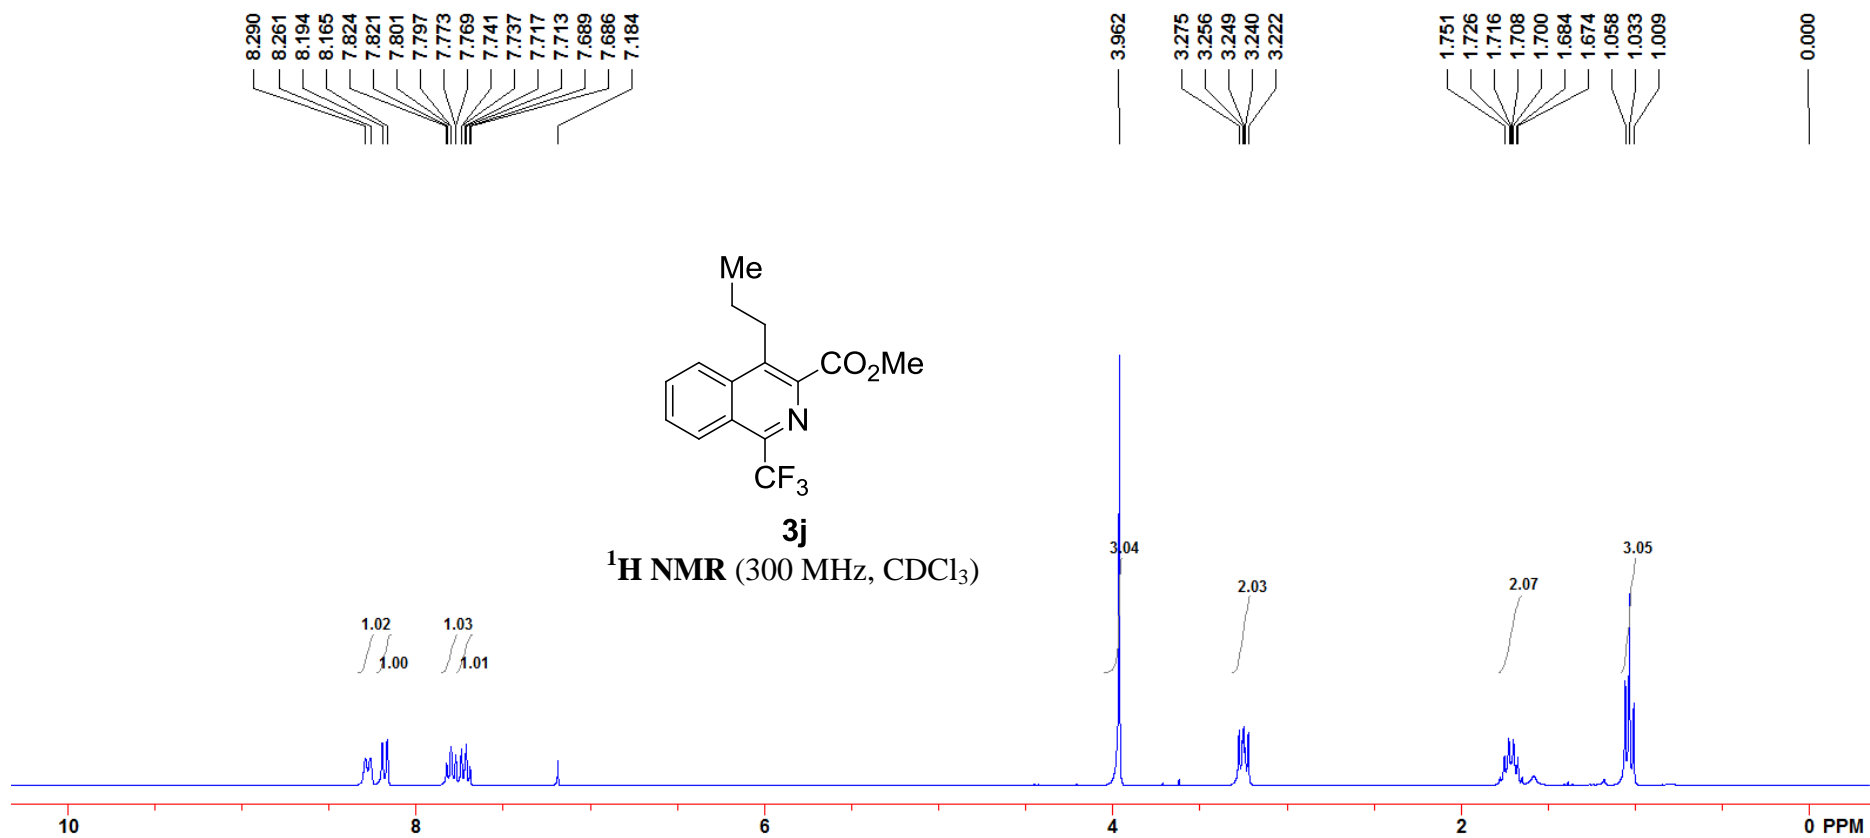



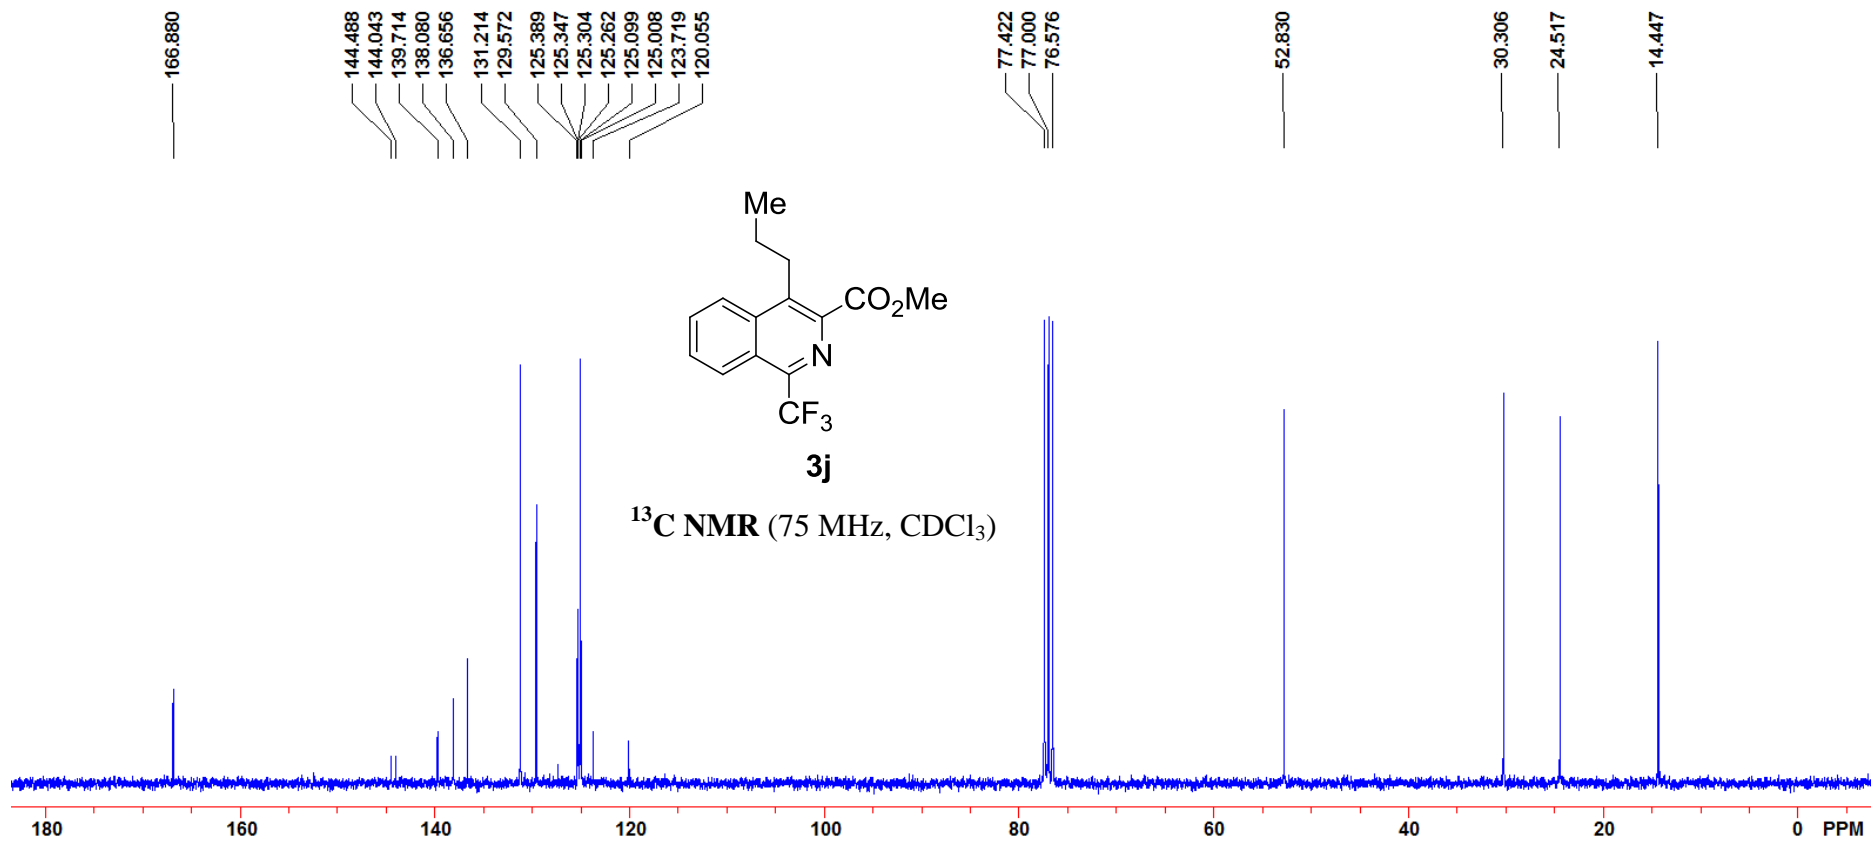

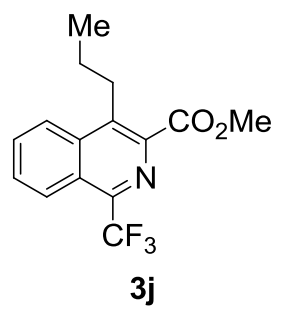

<sup>19</sup>F NMR (282 MHz, CDCl<sub>3</sub>)

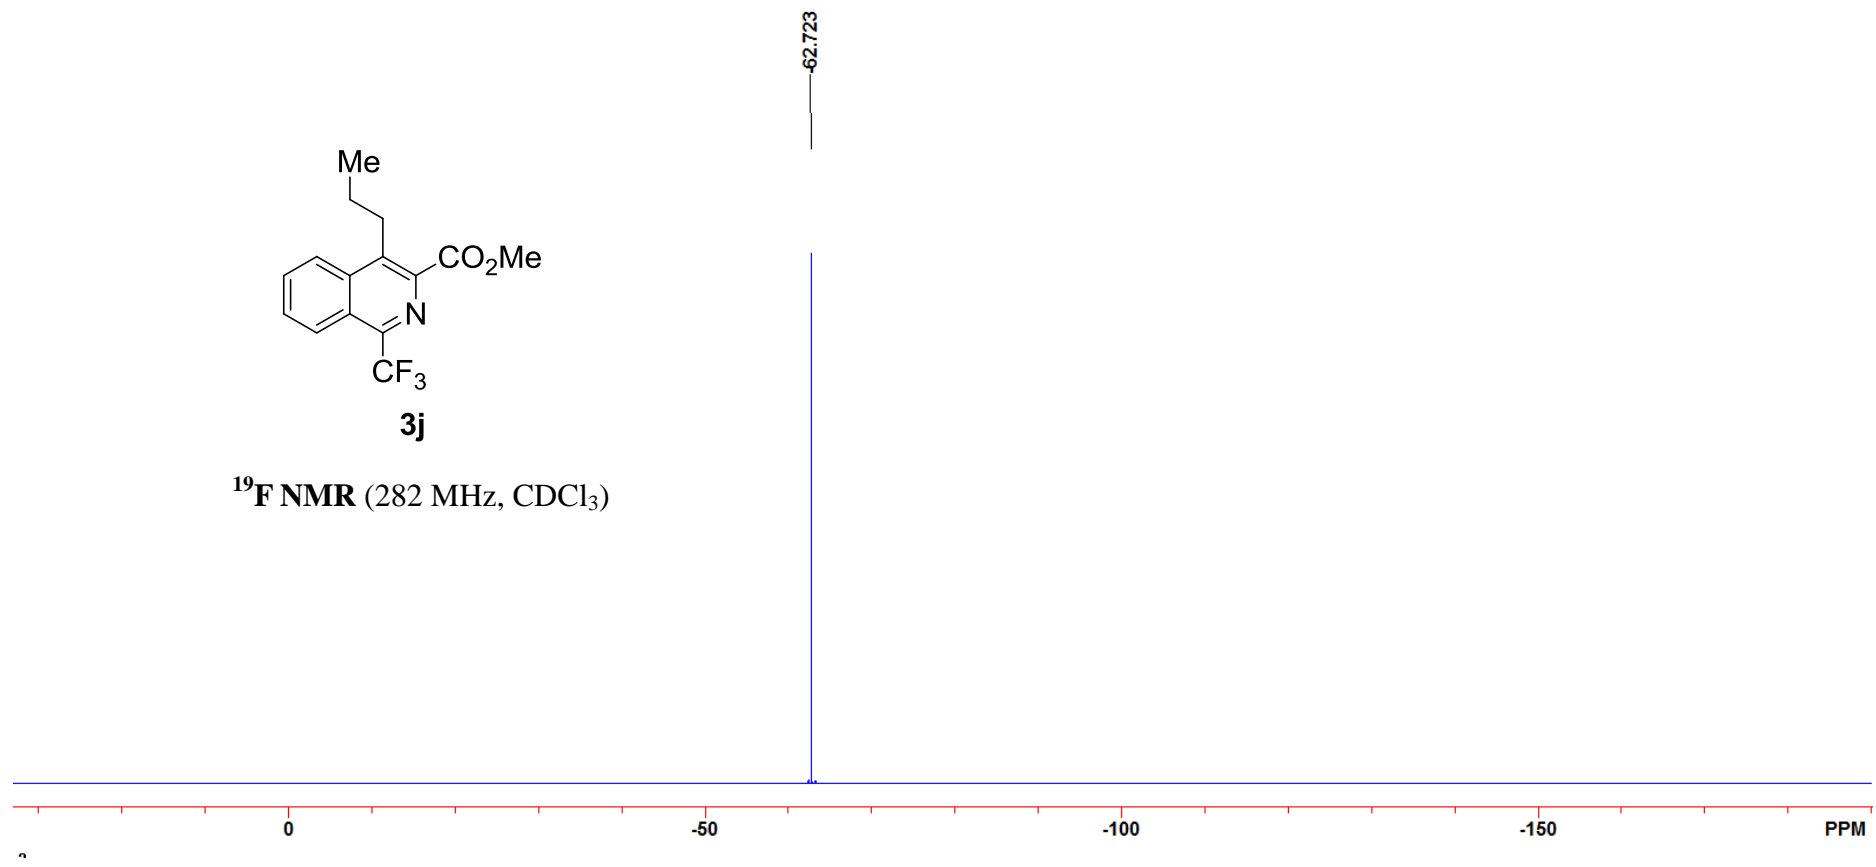

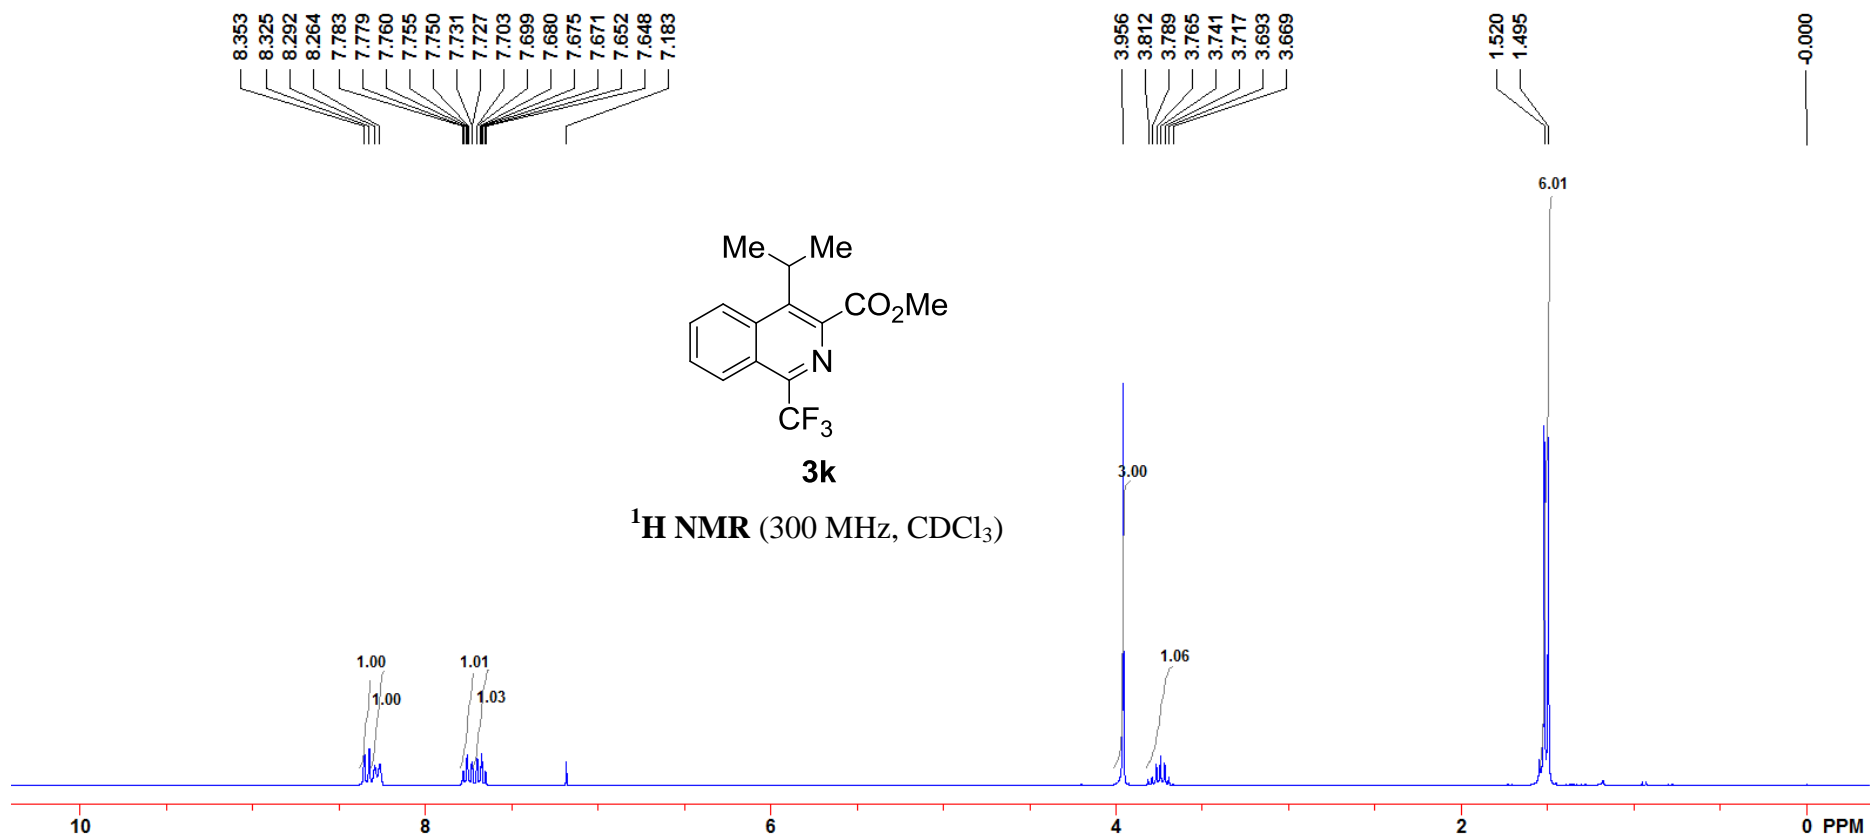

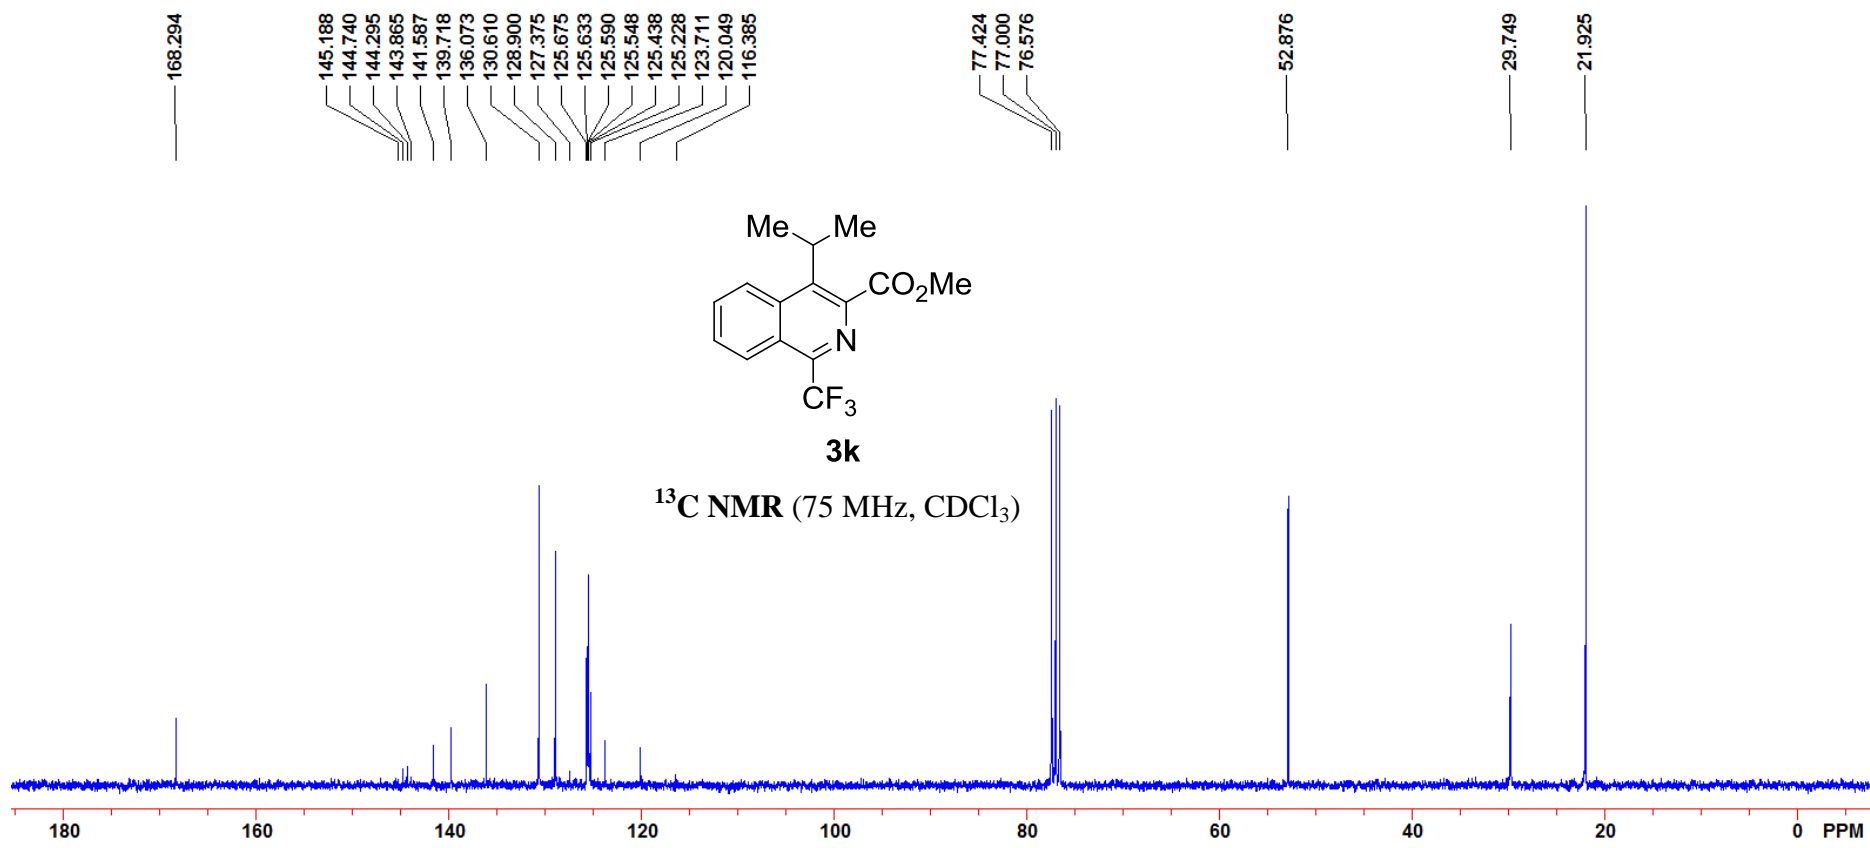

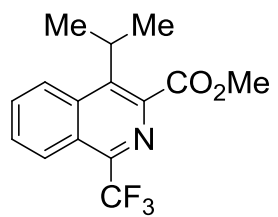

**3k**

<sup>19</sup>F NMR (282 MHz, CDCl<sub>3</sub>)

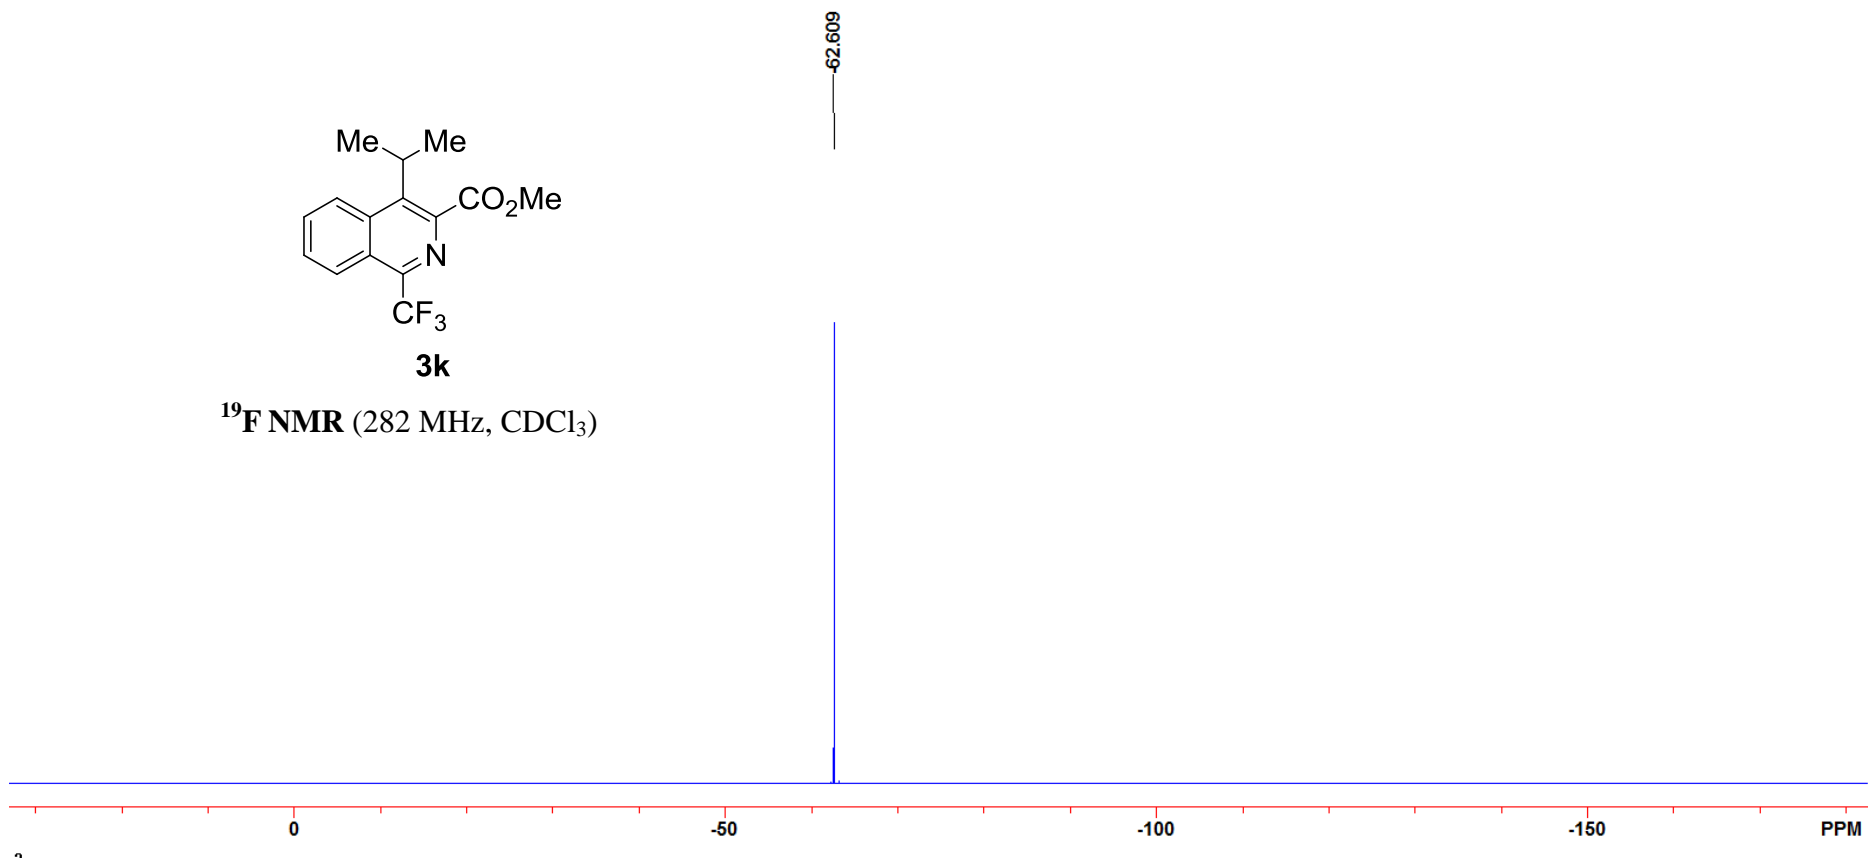

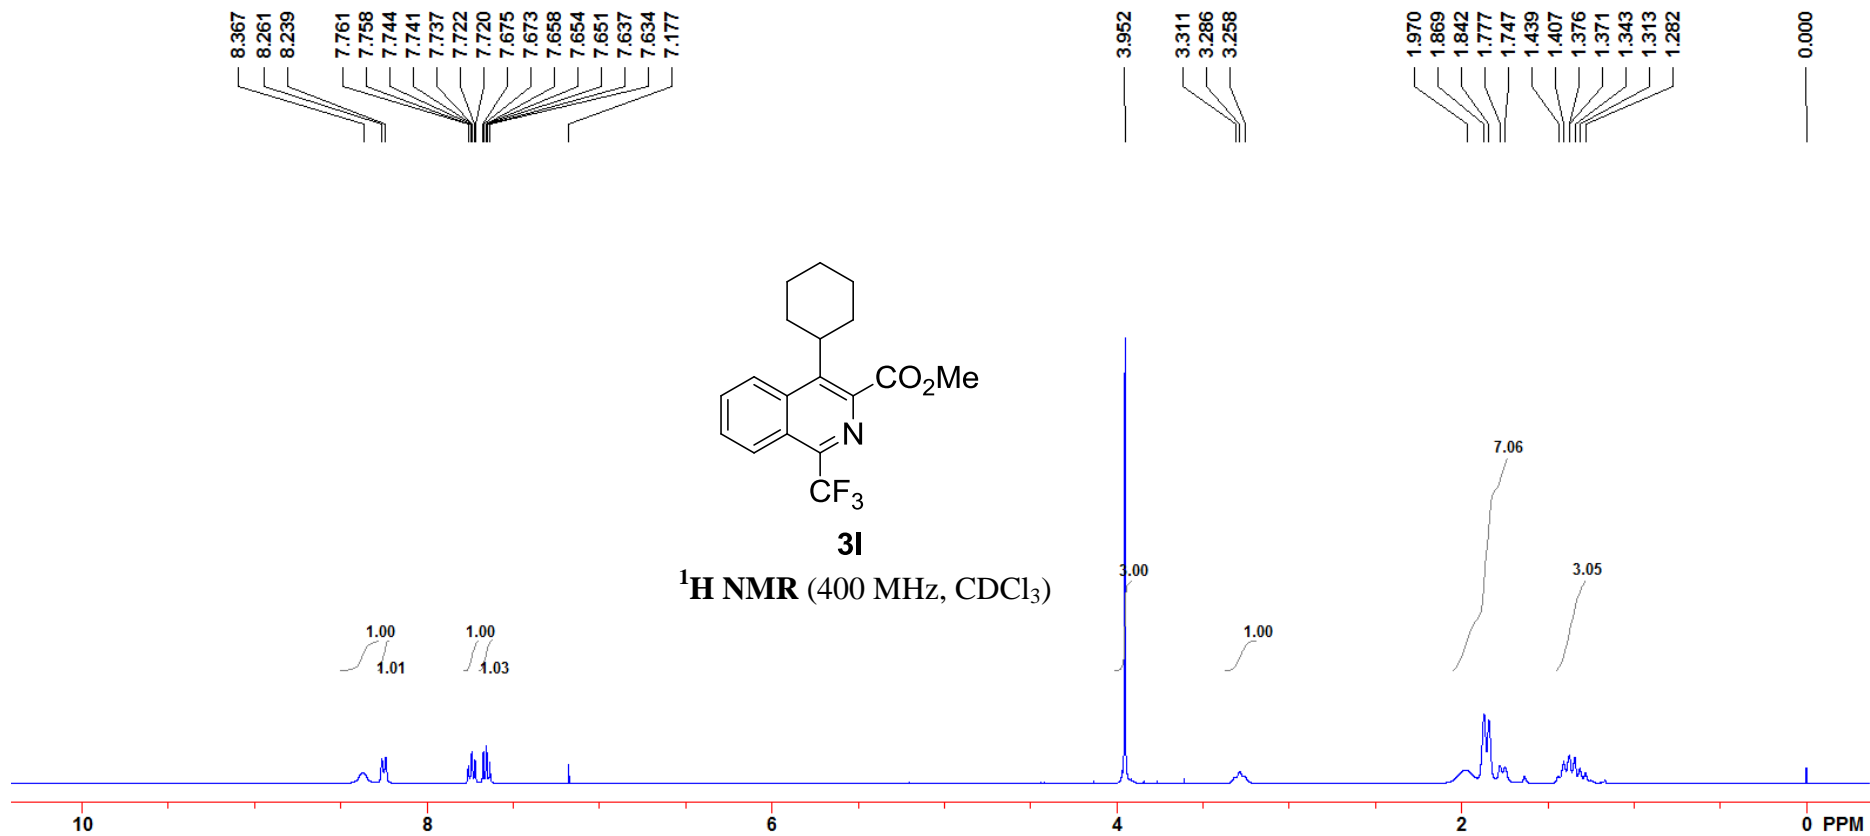

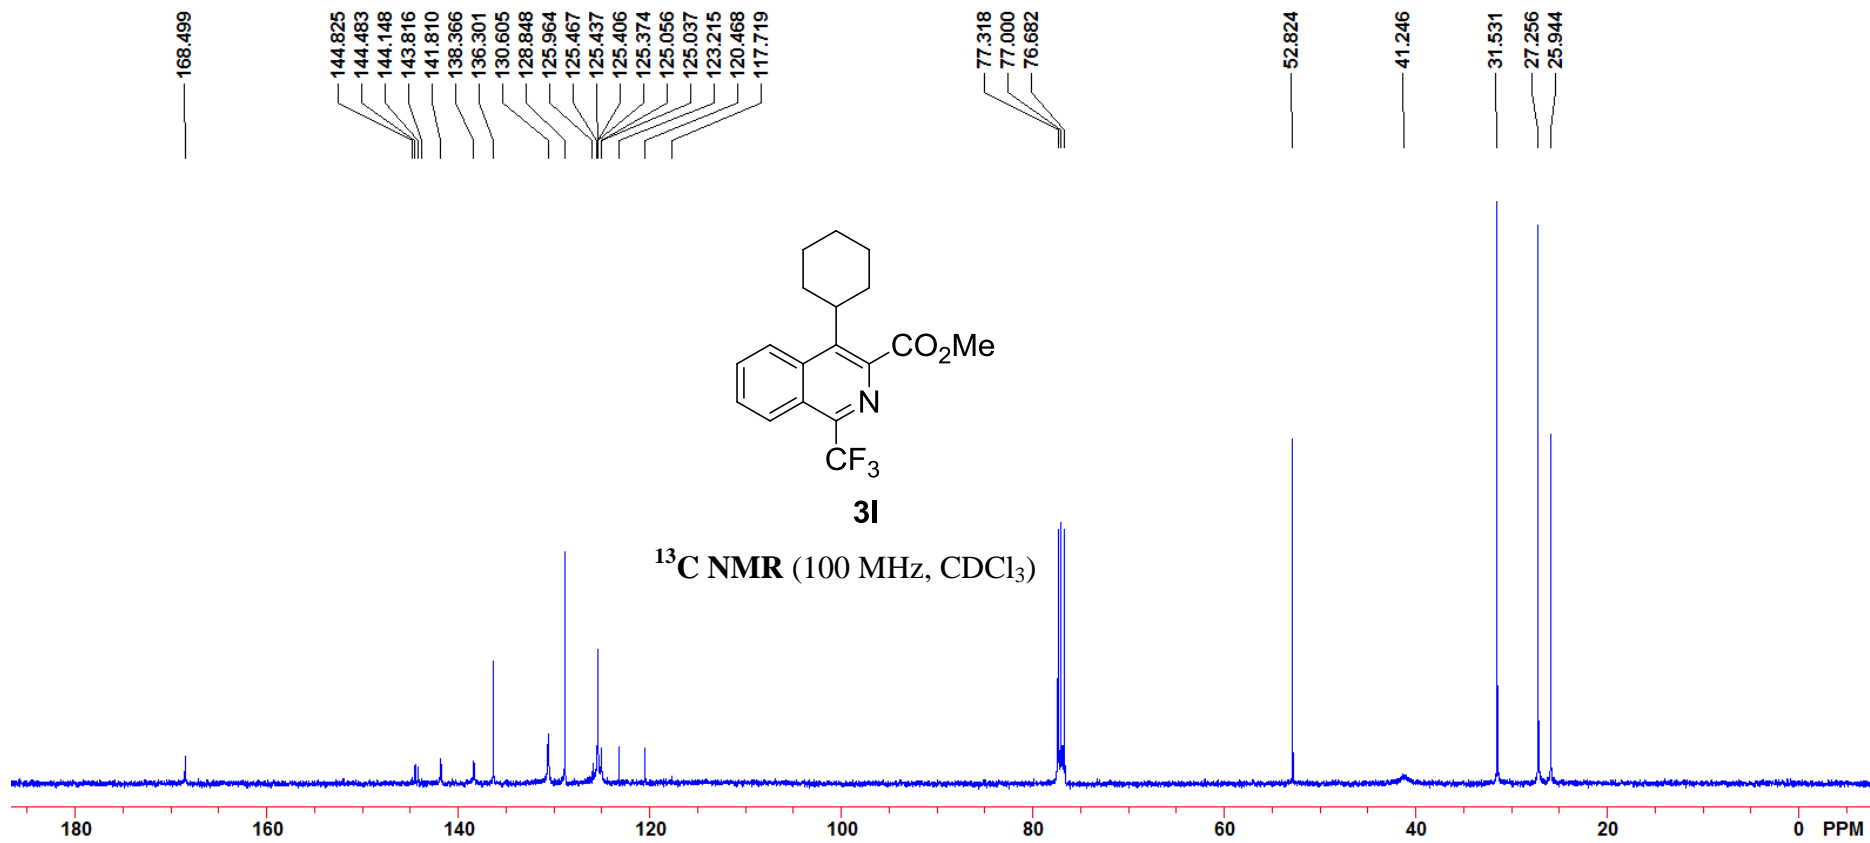

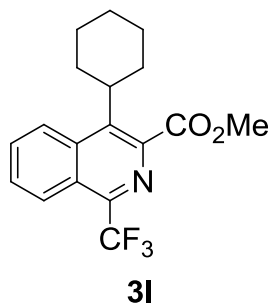

<sup>19</sup>F NMR (282 MHz, CDCl<sub>3</sub>)

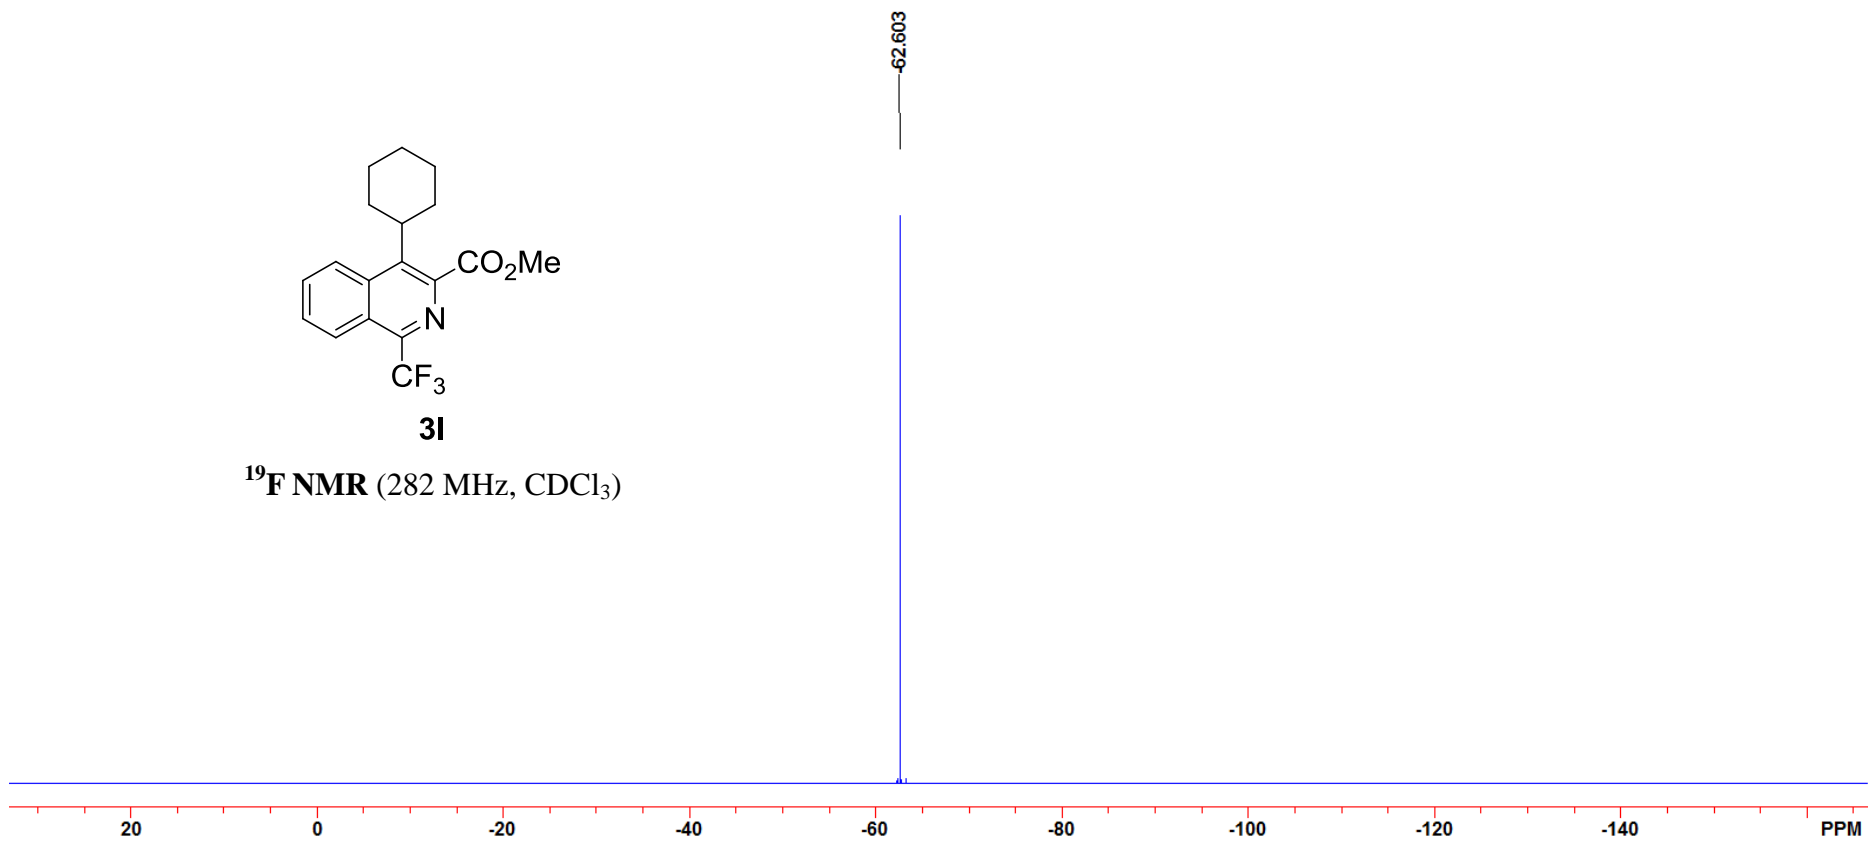



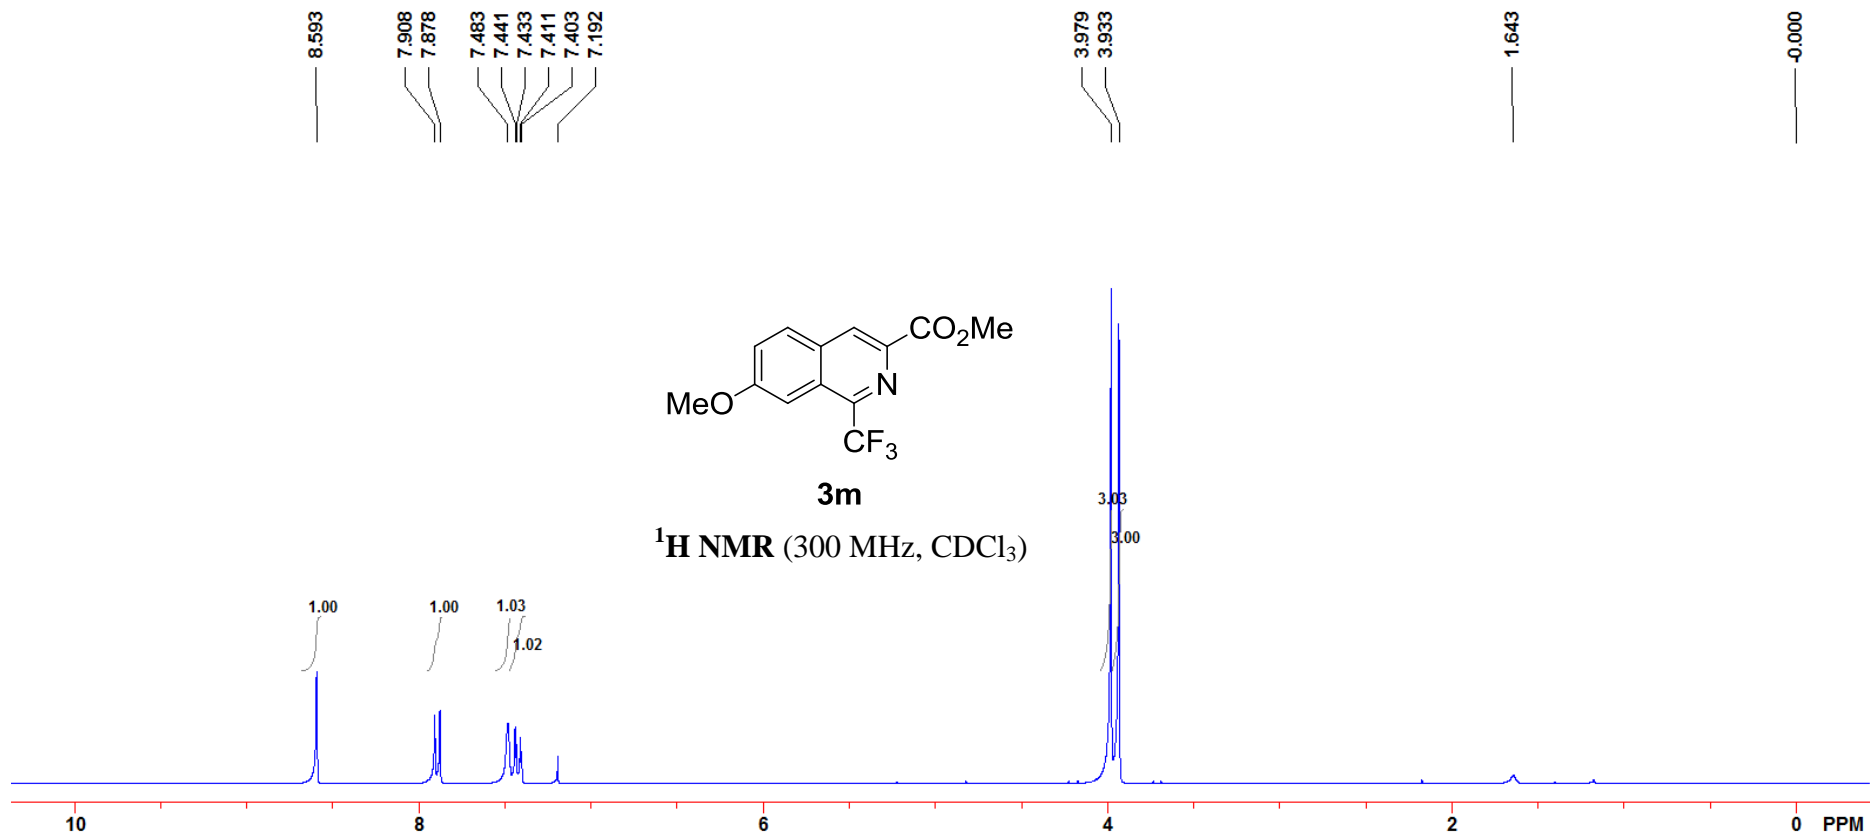

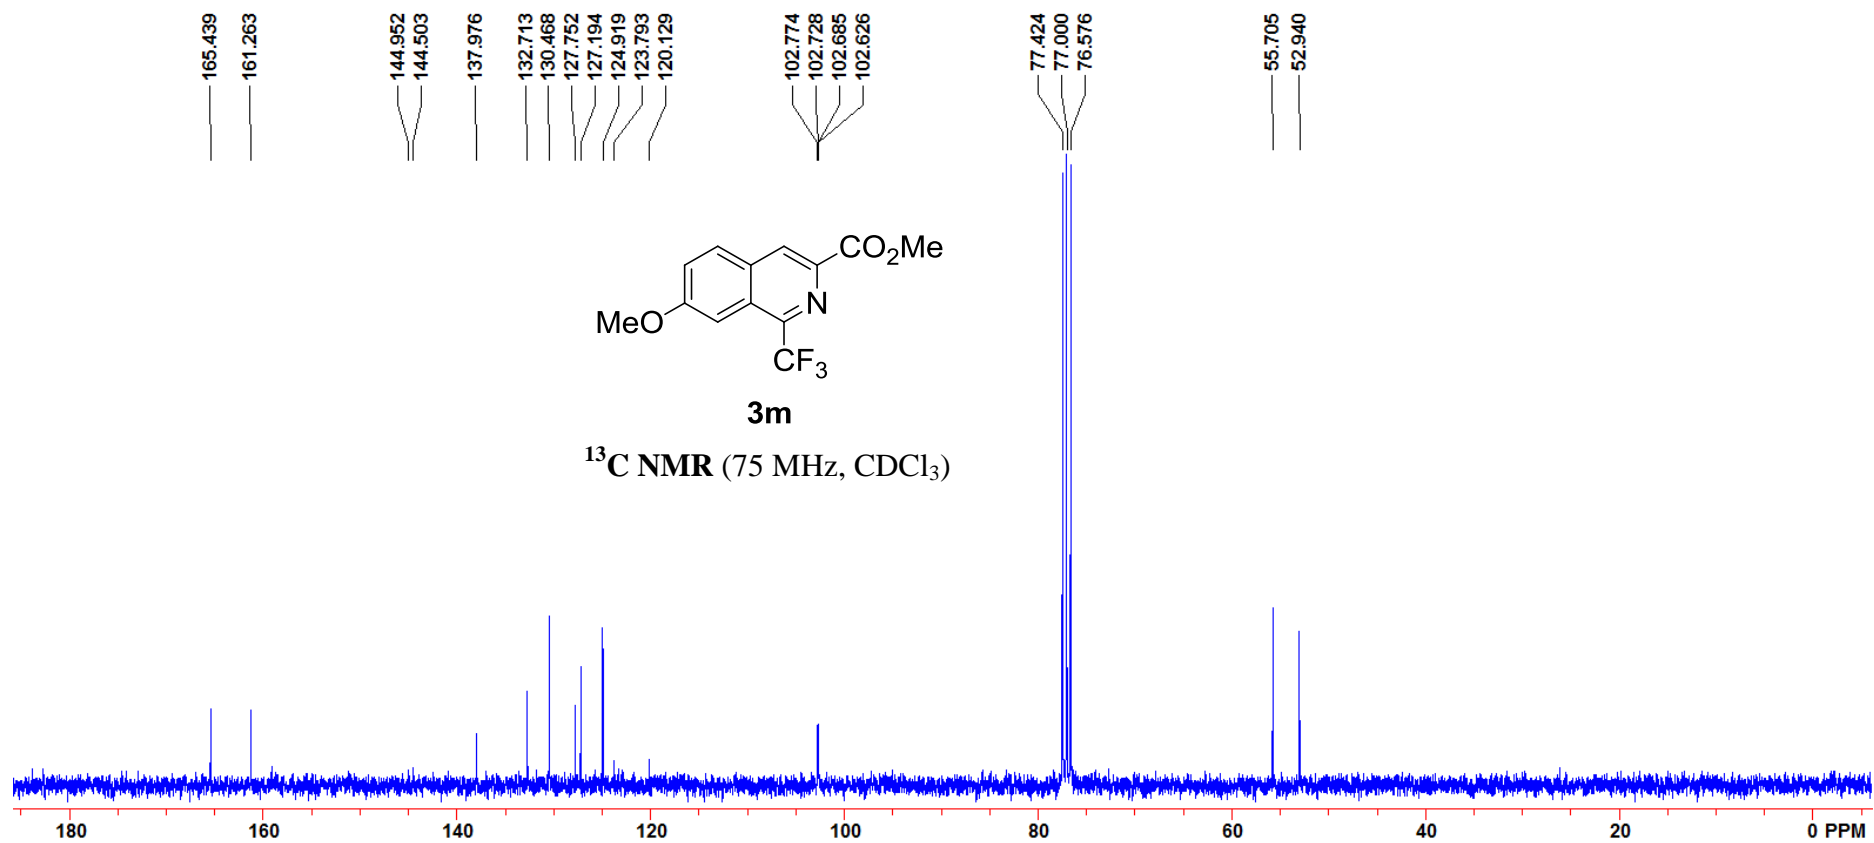

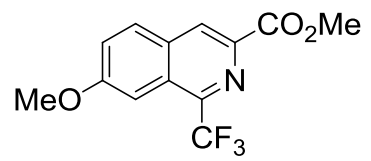

**3m**

<sup>19</sup>F NMR (282 MHz, CDCl<sub>3</sub>)

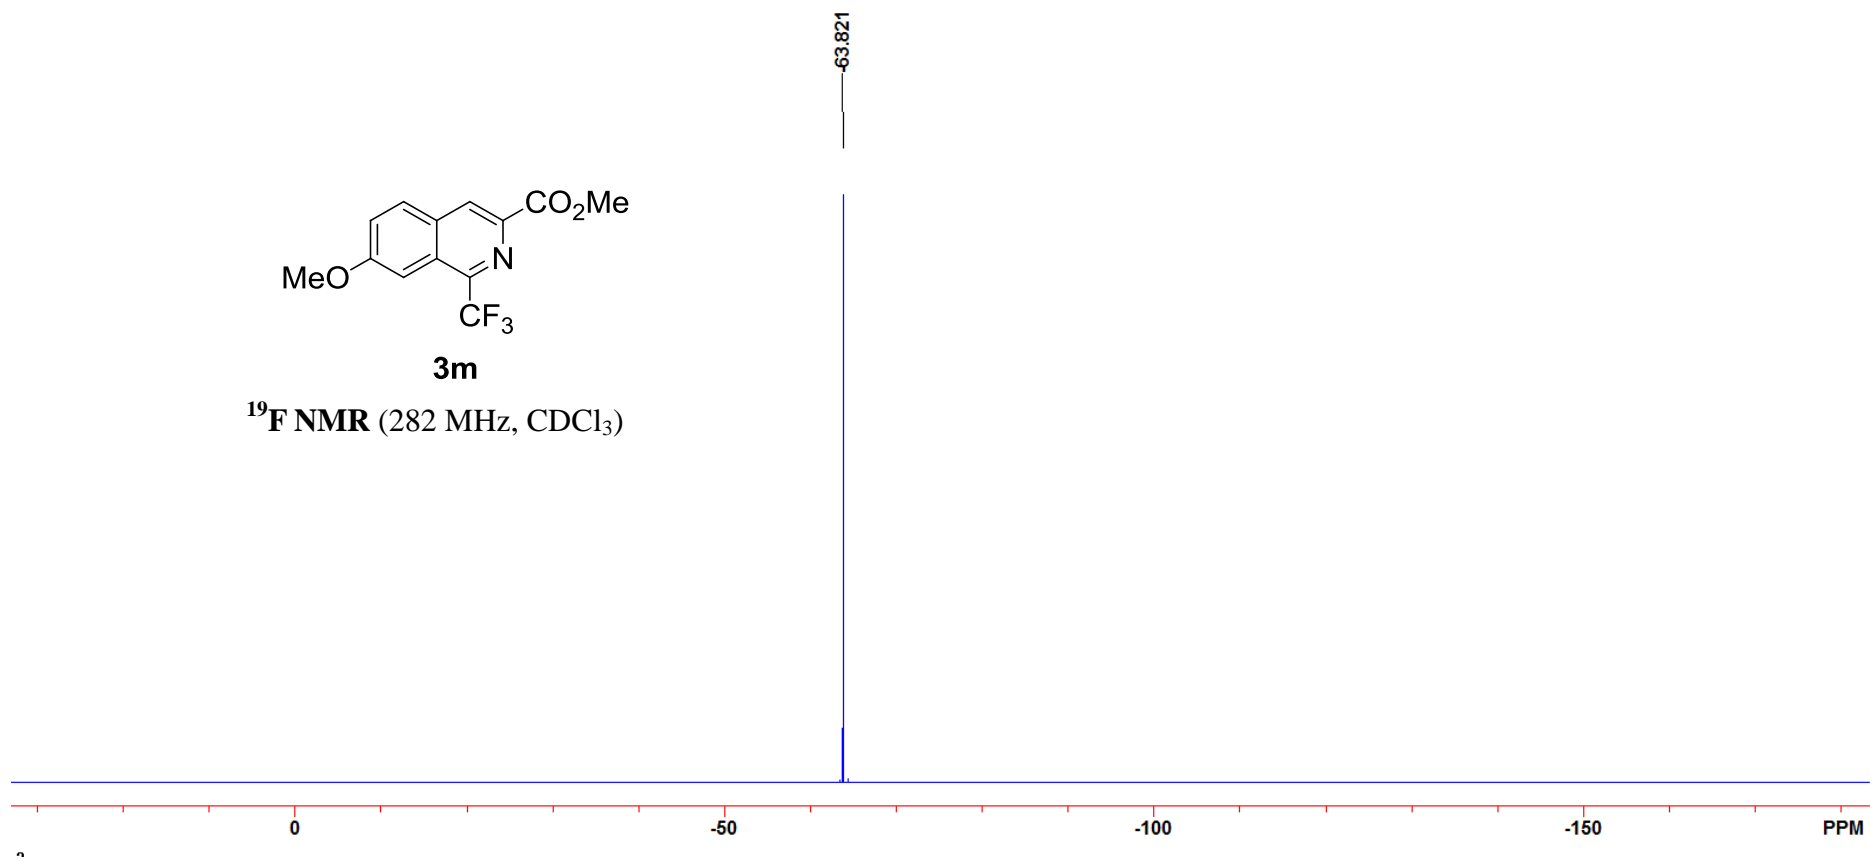

8.335  
8.309  
7.740  
7.731  
7.722  
7.714  
7.704  
7.694  
7.692  
7.685  
7.677  
7.657  
7.443  
7.431  
7.422  
7.292  
7.288  
7.281  
7.269  
7.262  
7.176

4.091  
4.068  
4.044  
4.020

0.936  
0.912  
0.888

0.000

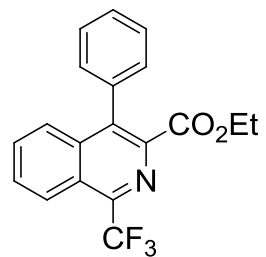

**3n**

<sup>1</sup>H NMR (300 MHz, CDCl<sub>3</sub>)

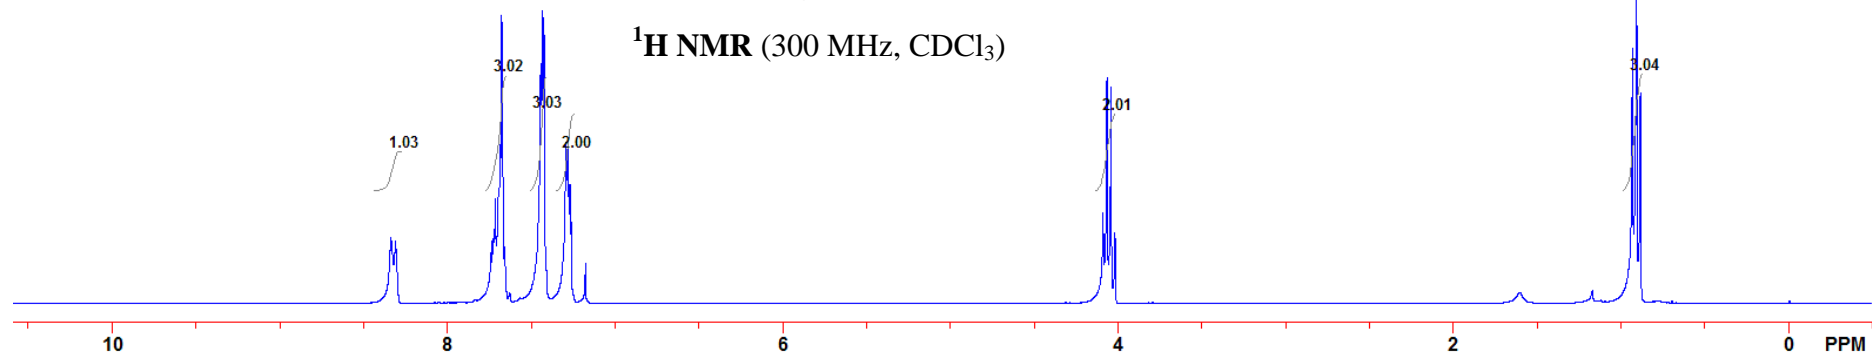

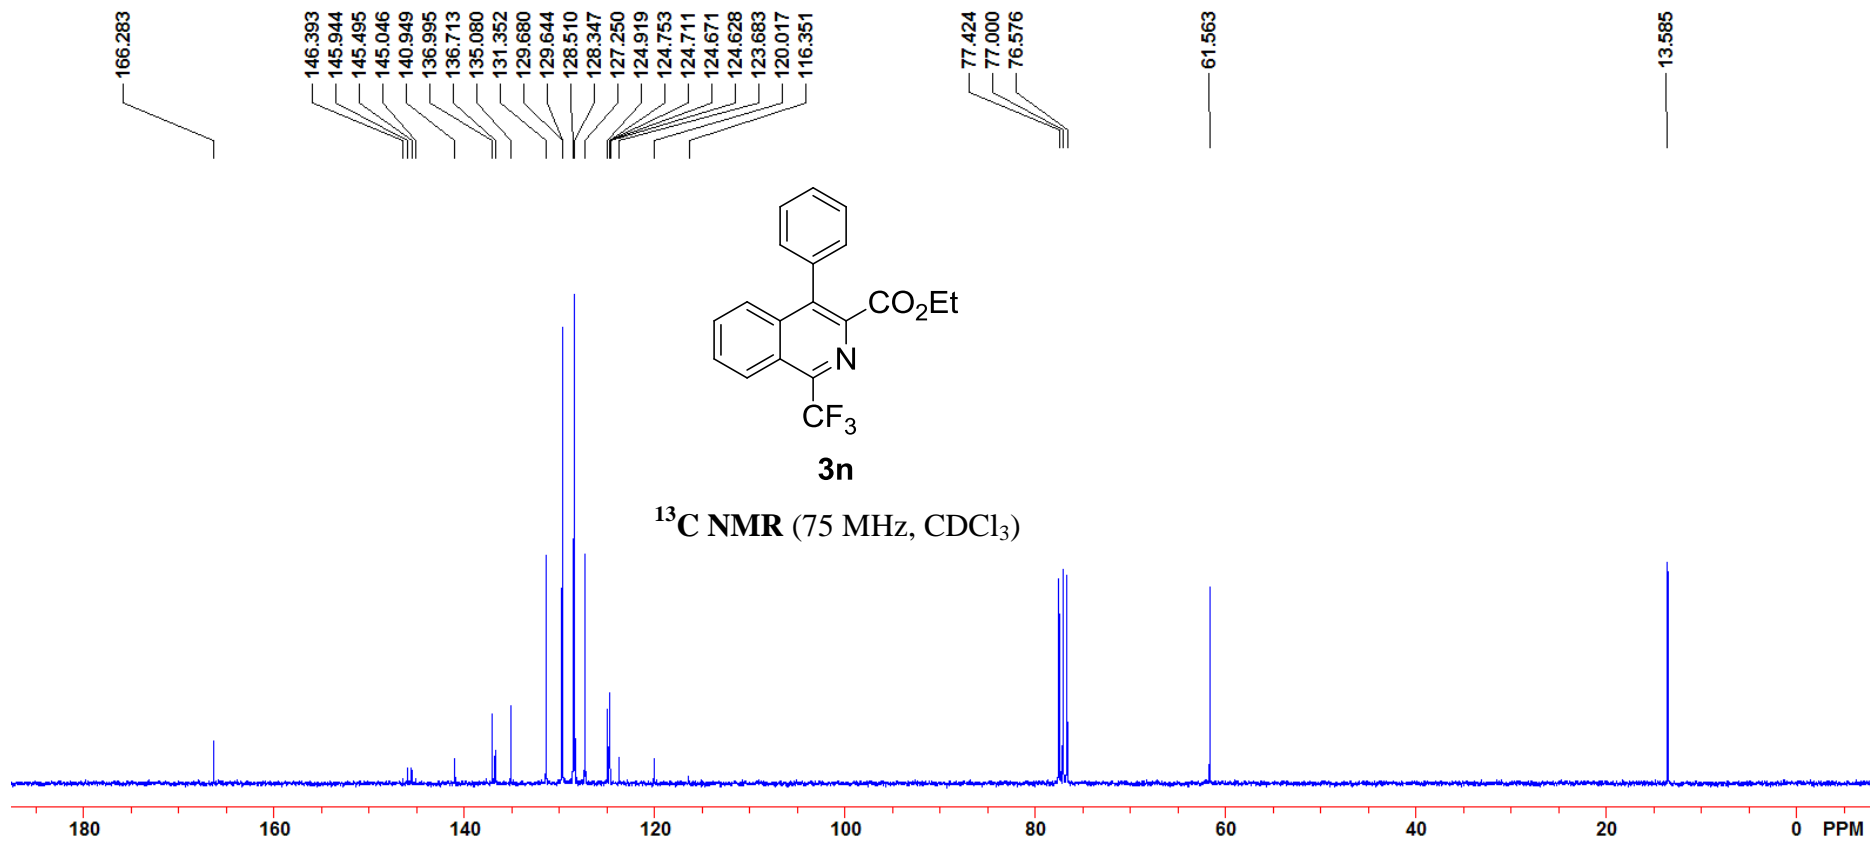

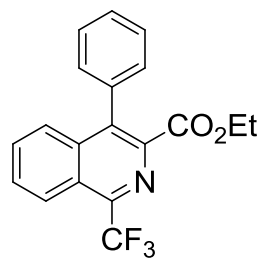

**3n**

**<sup>19</sup>F NMR (282 MHz, CDCl<sub>3</sub>)**

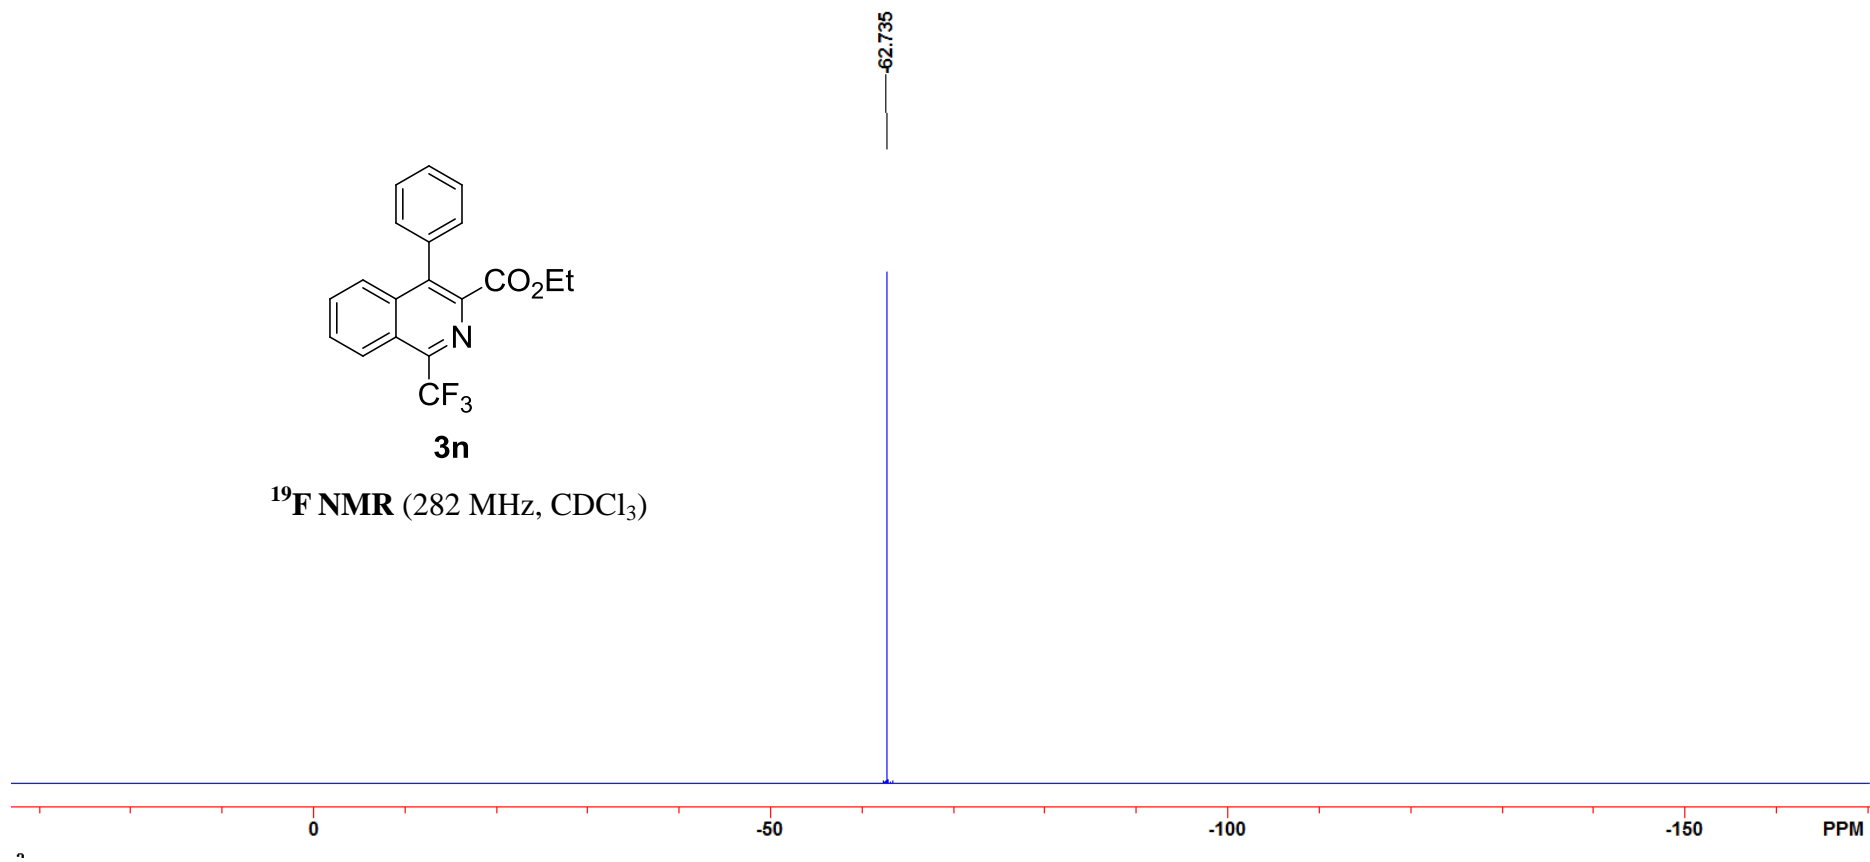

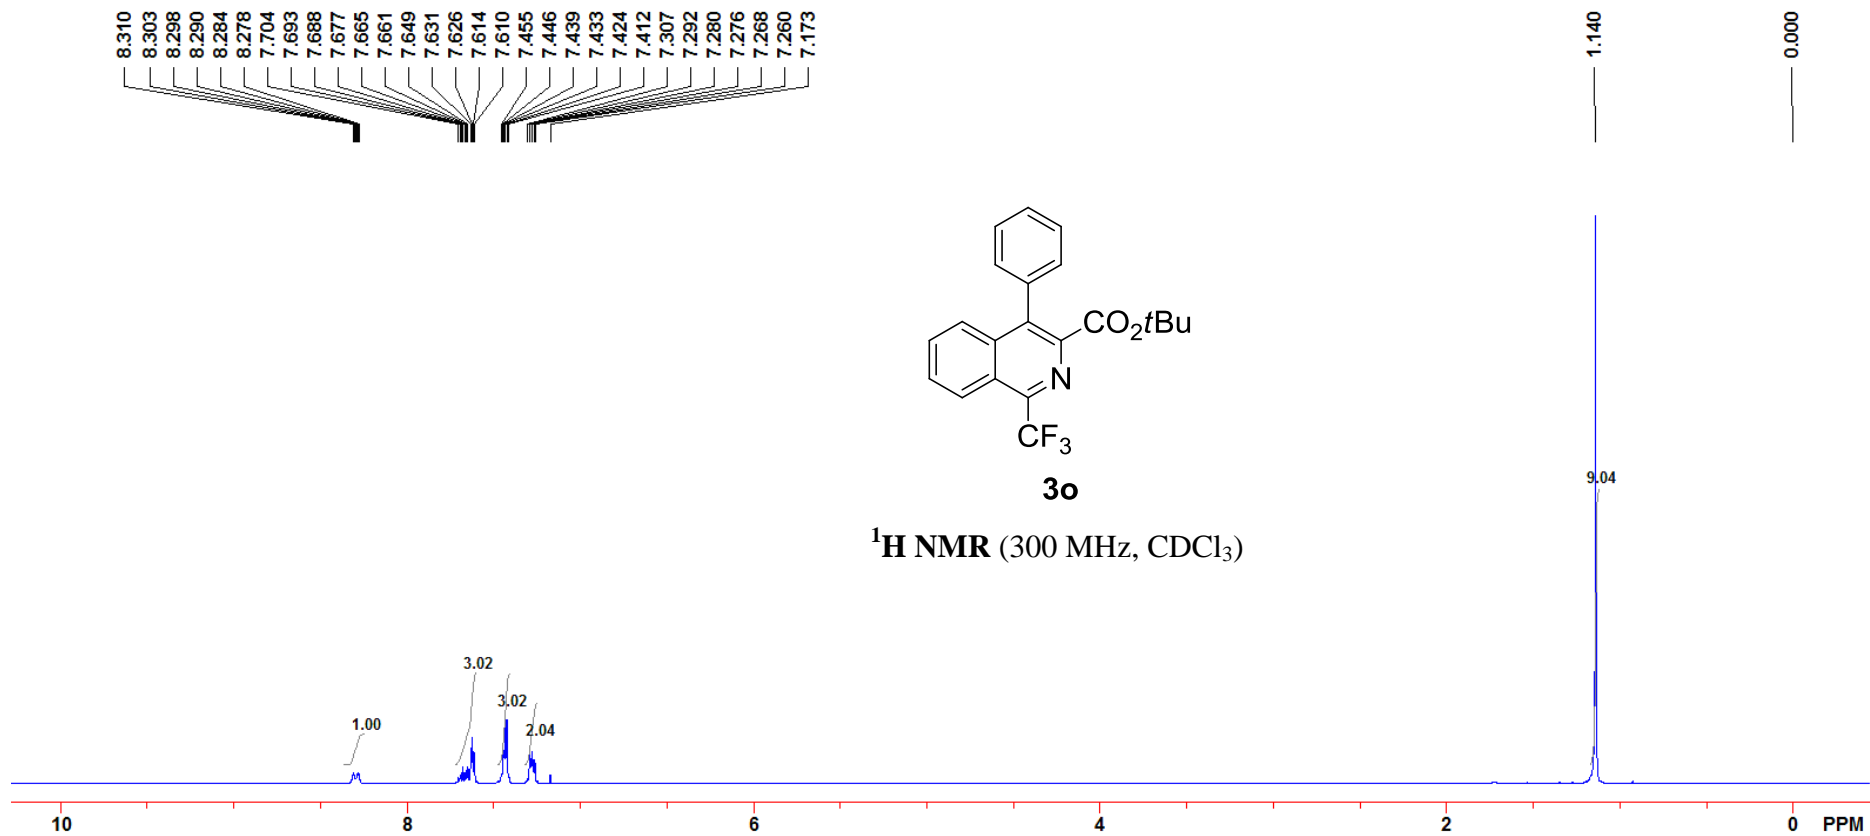

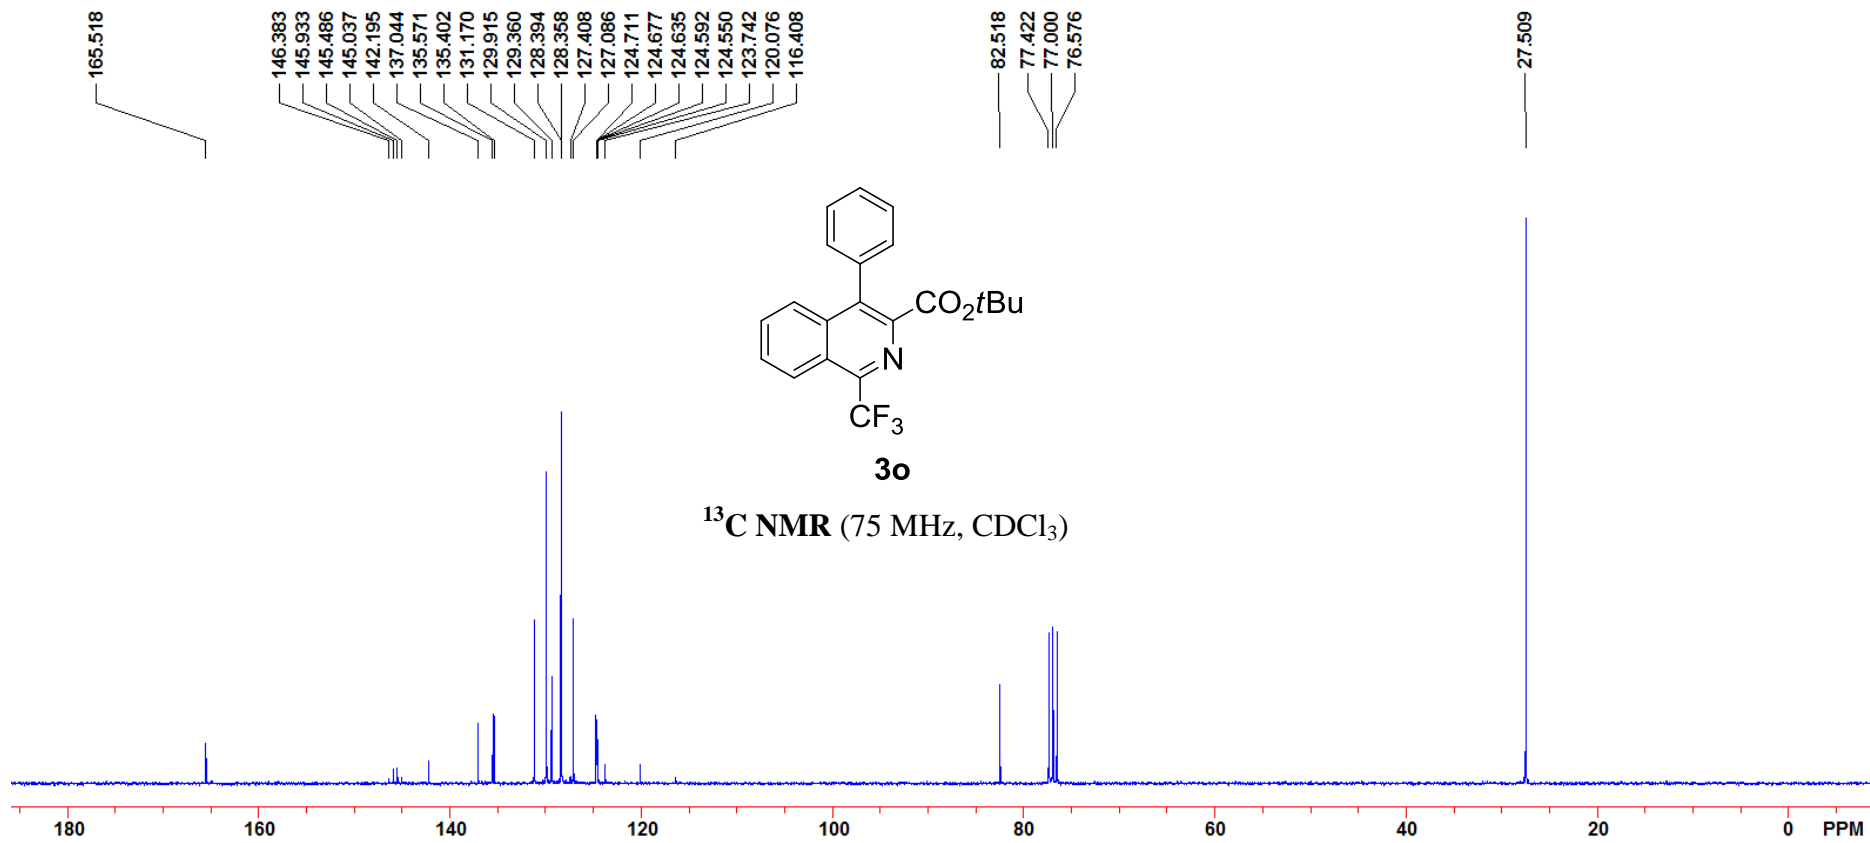



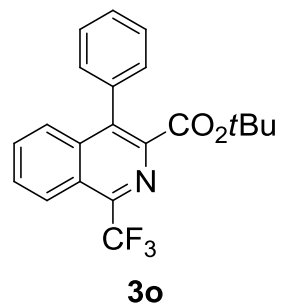

<sup>19</sup>F NMR (282 MHz, CDCl<sub>3</sub>)

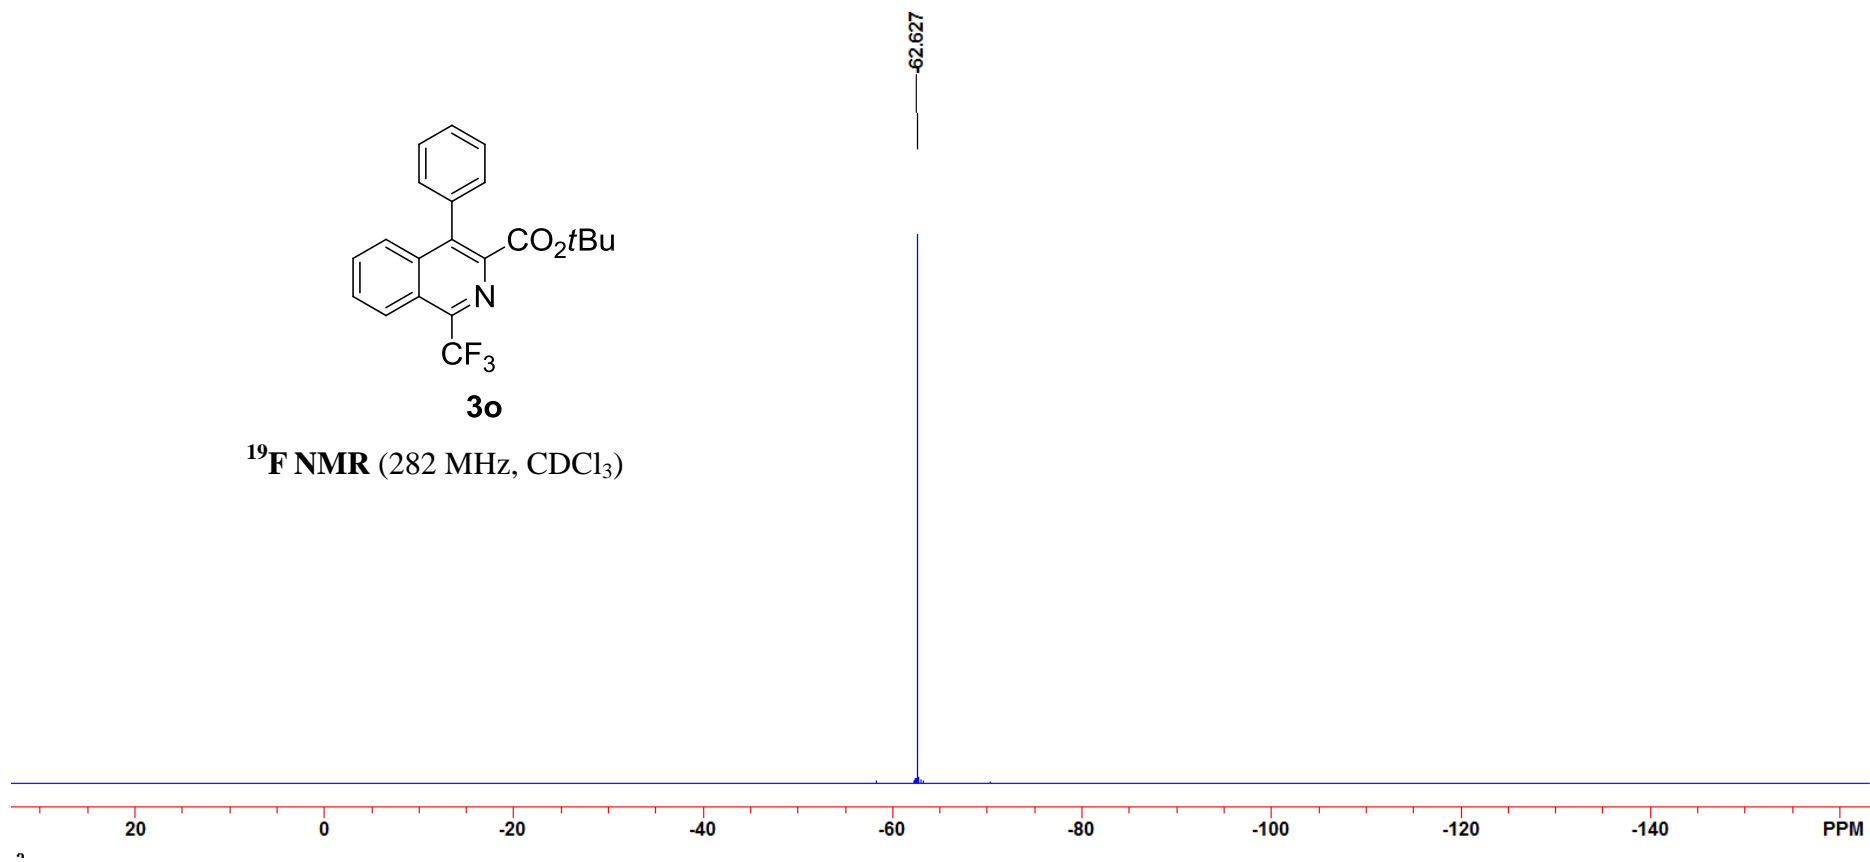

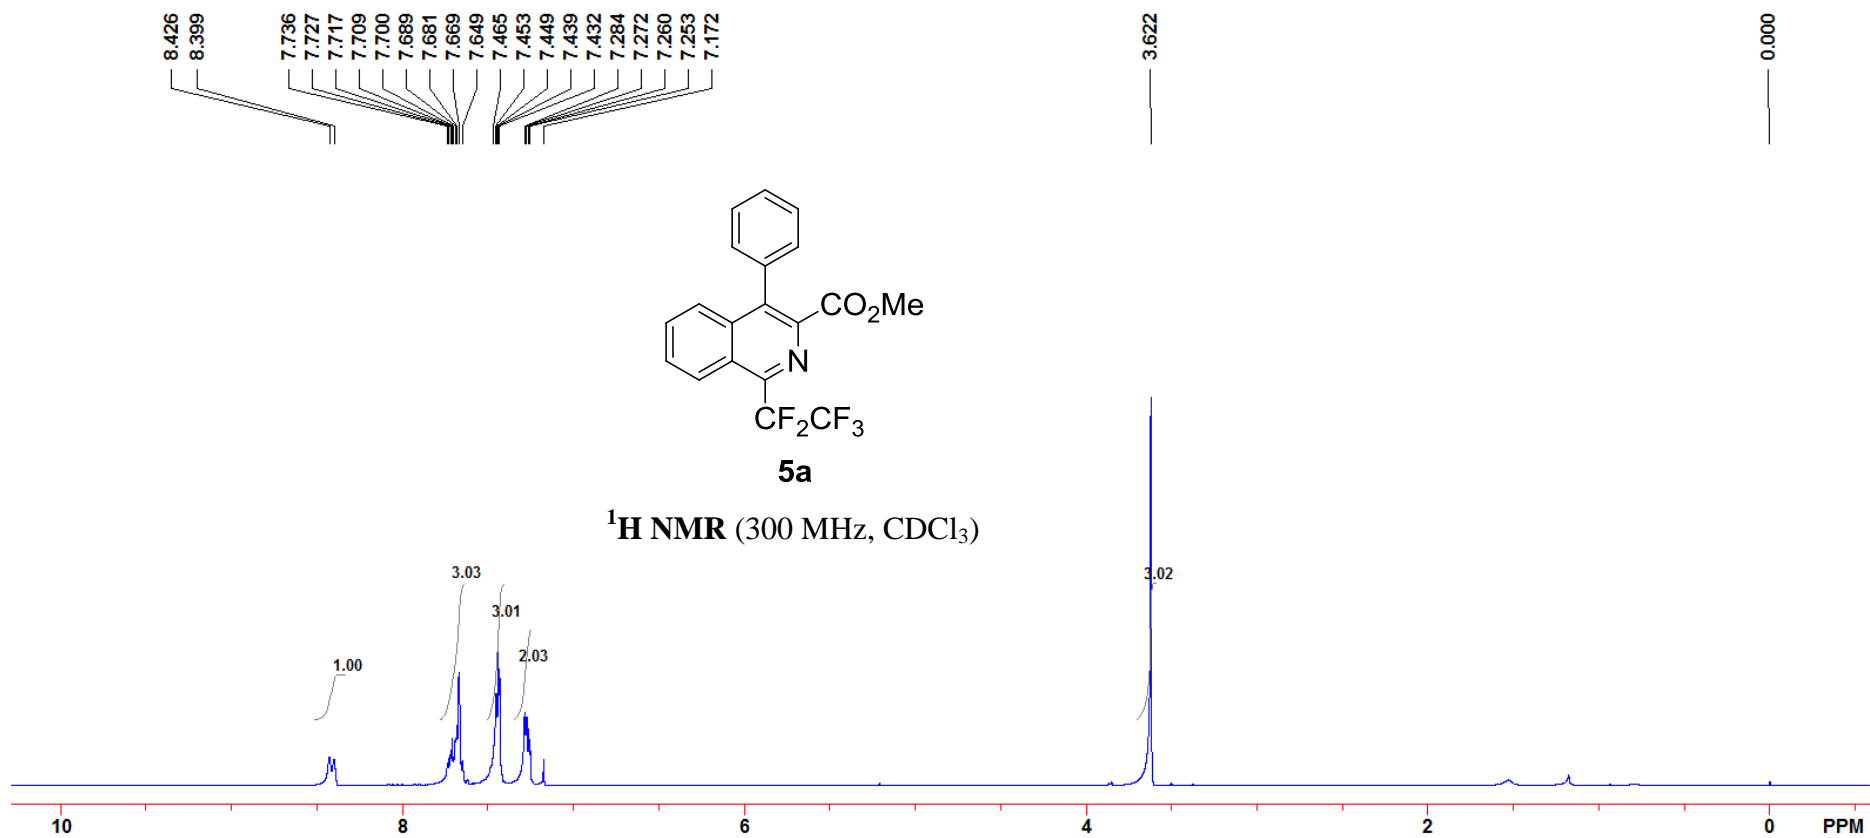

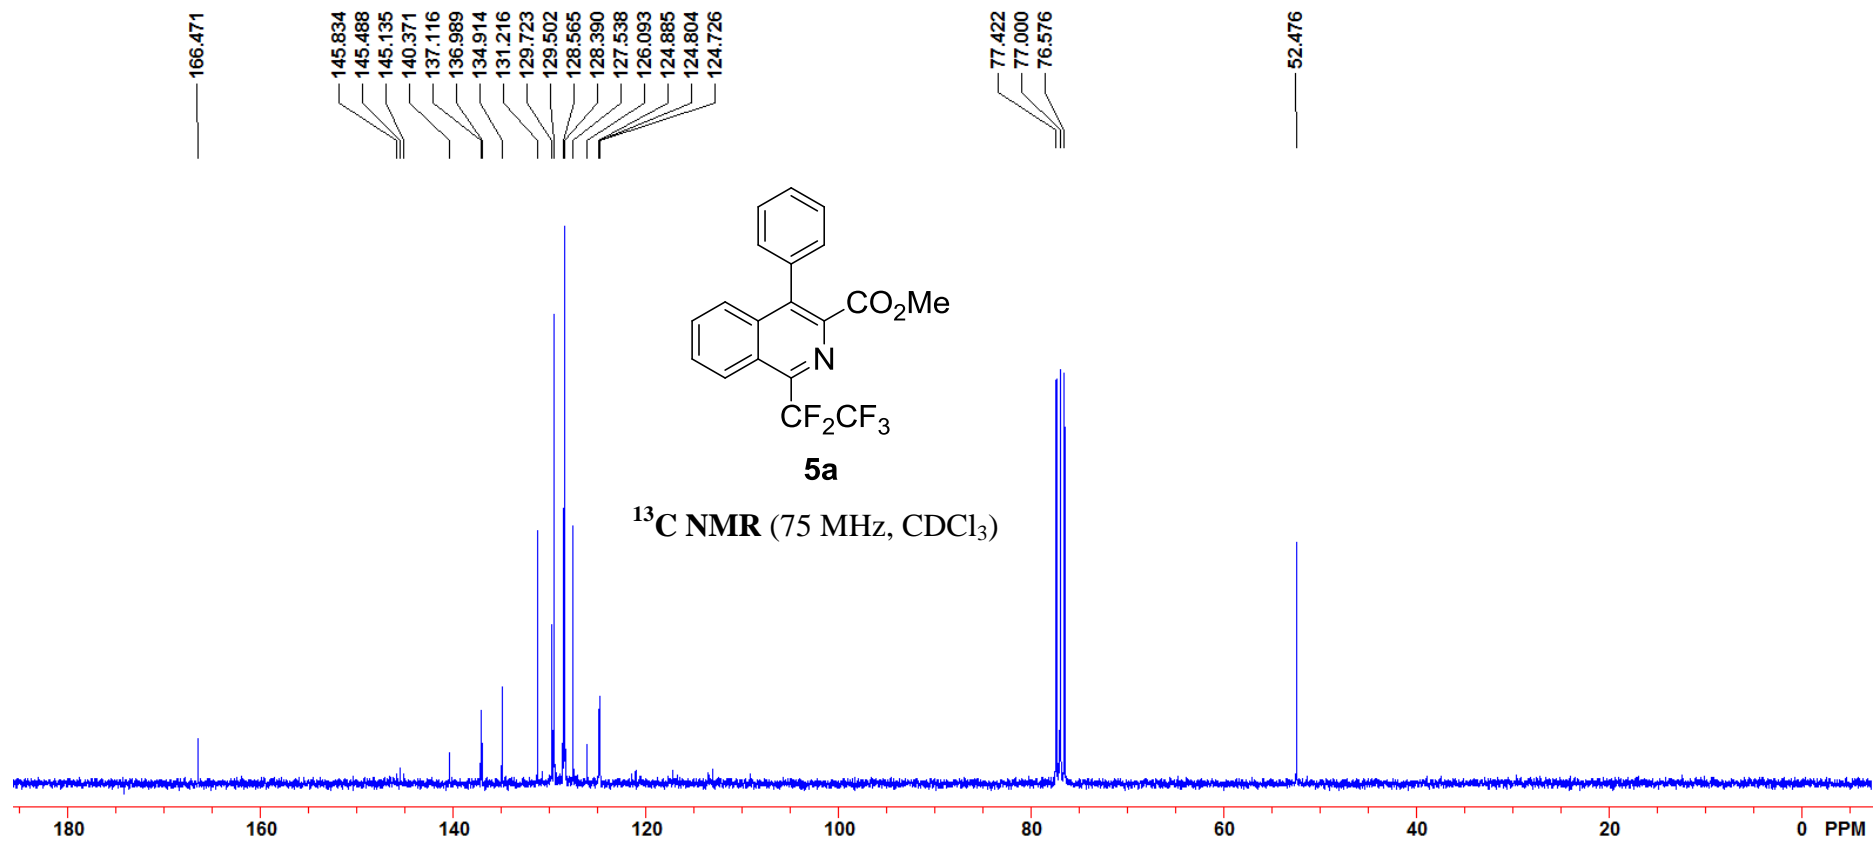

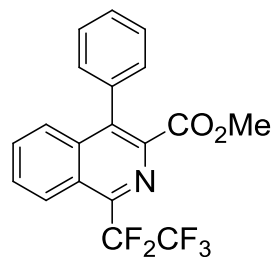

**5a**

**<sup>19</sup>F NMR (282 MHz, CDCl<sub>3</sub>)**

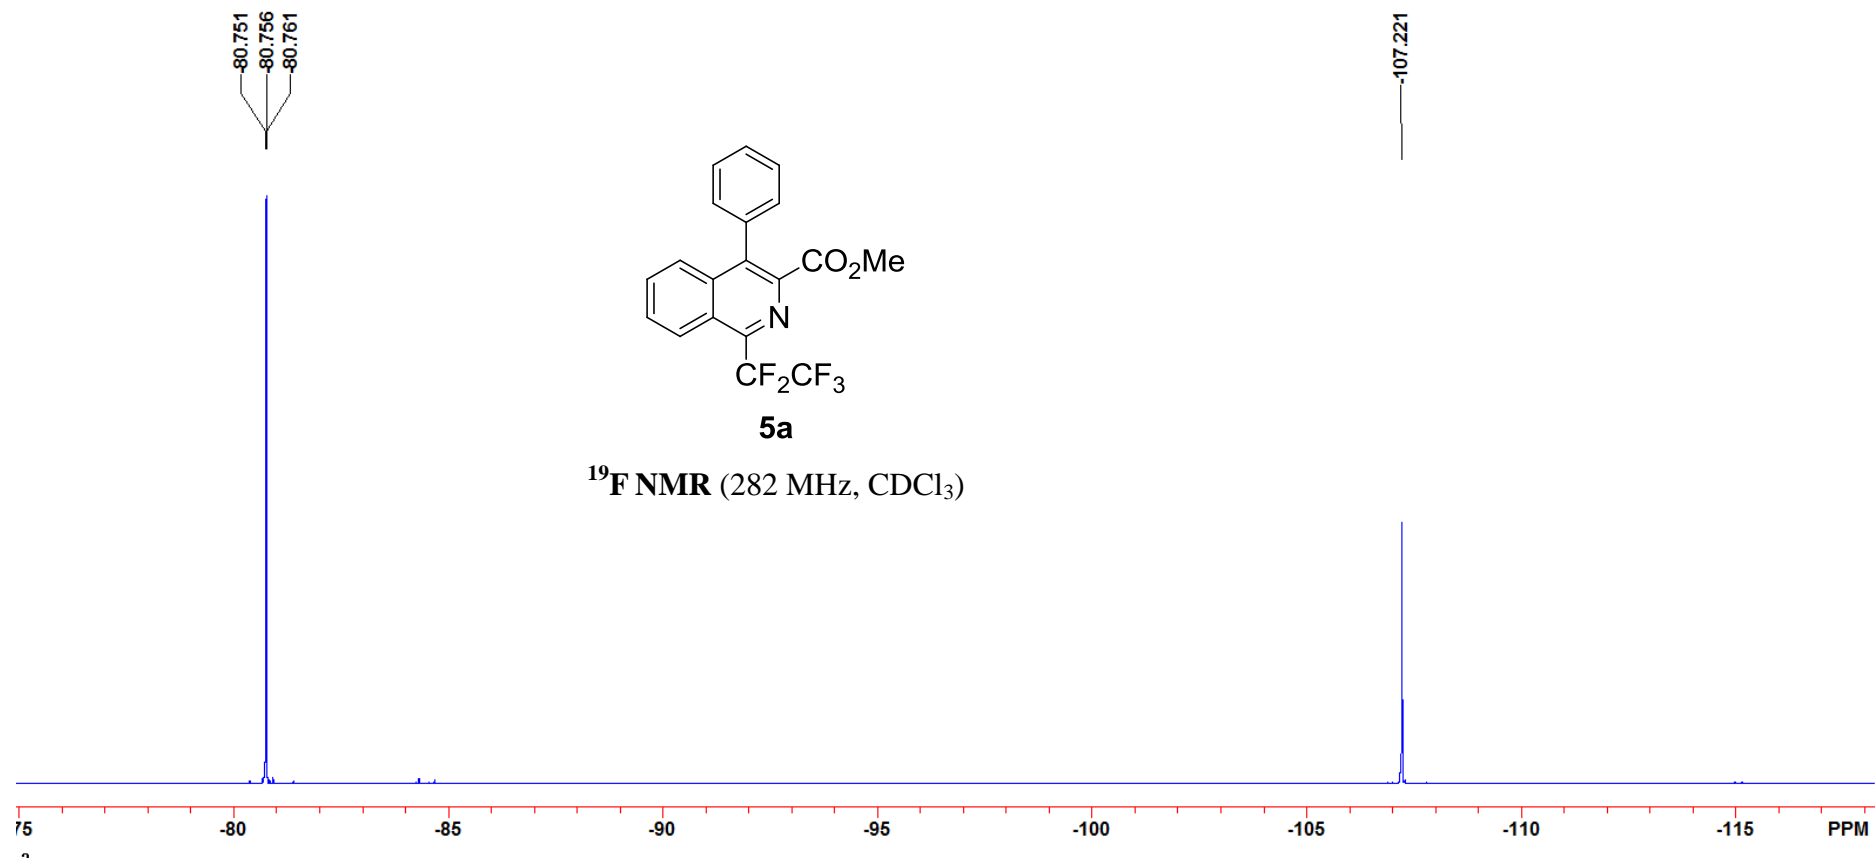

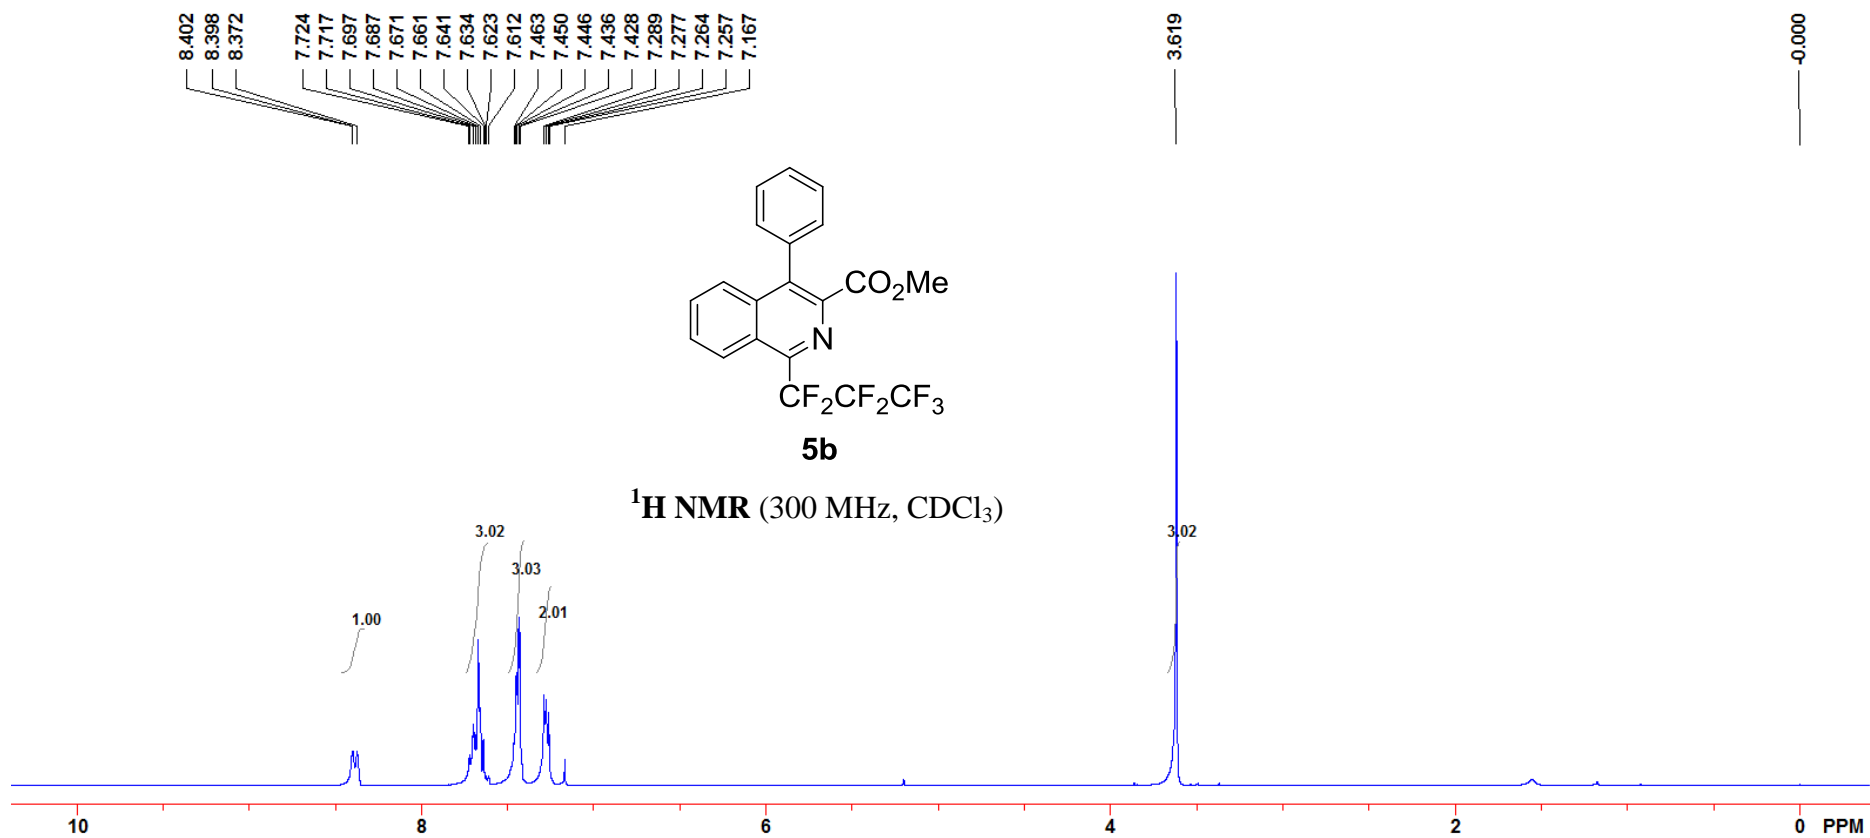

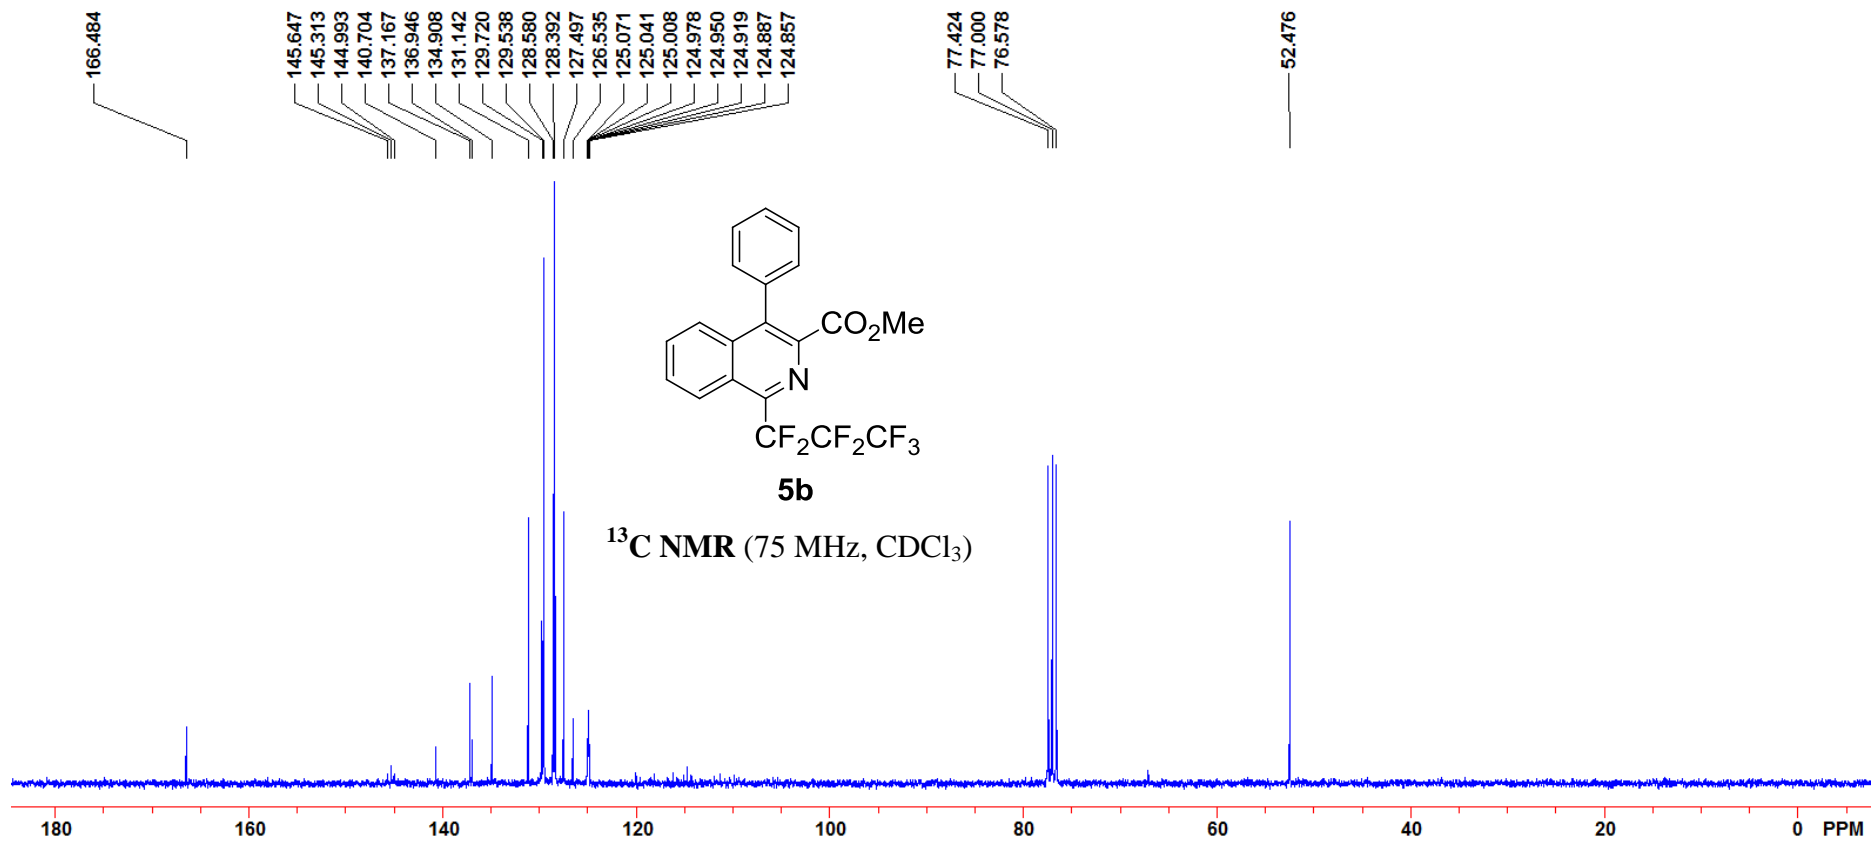

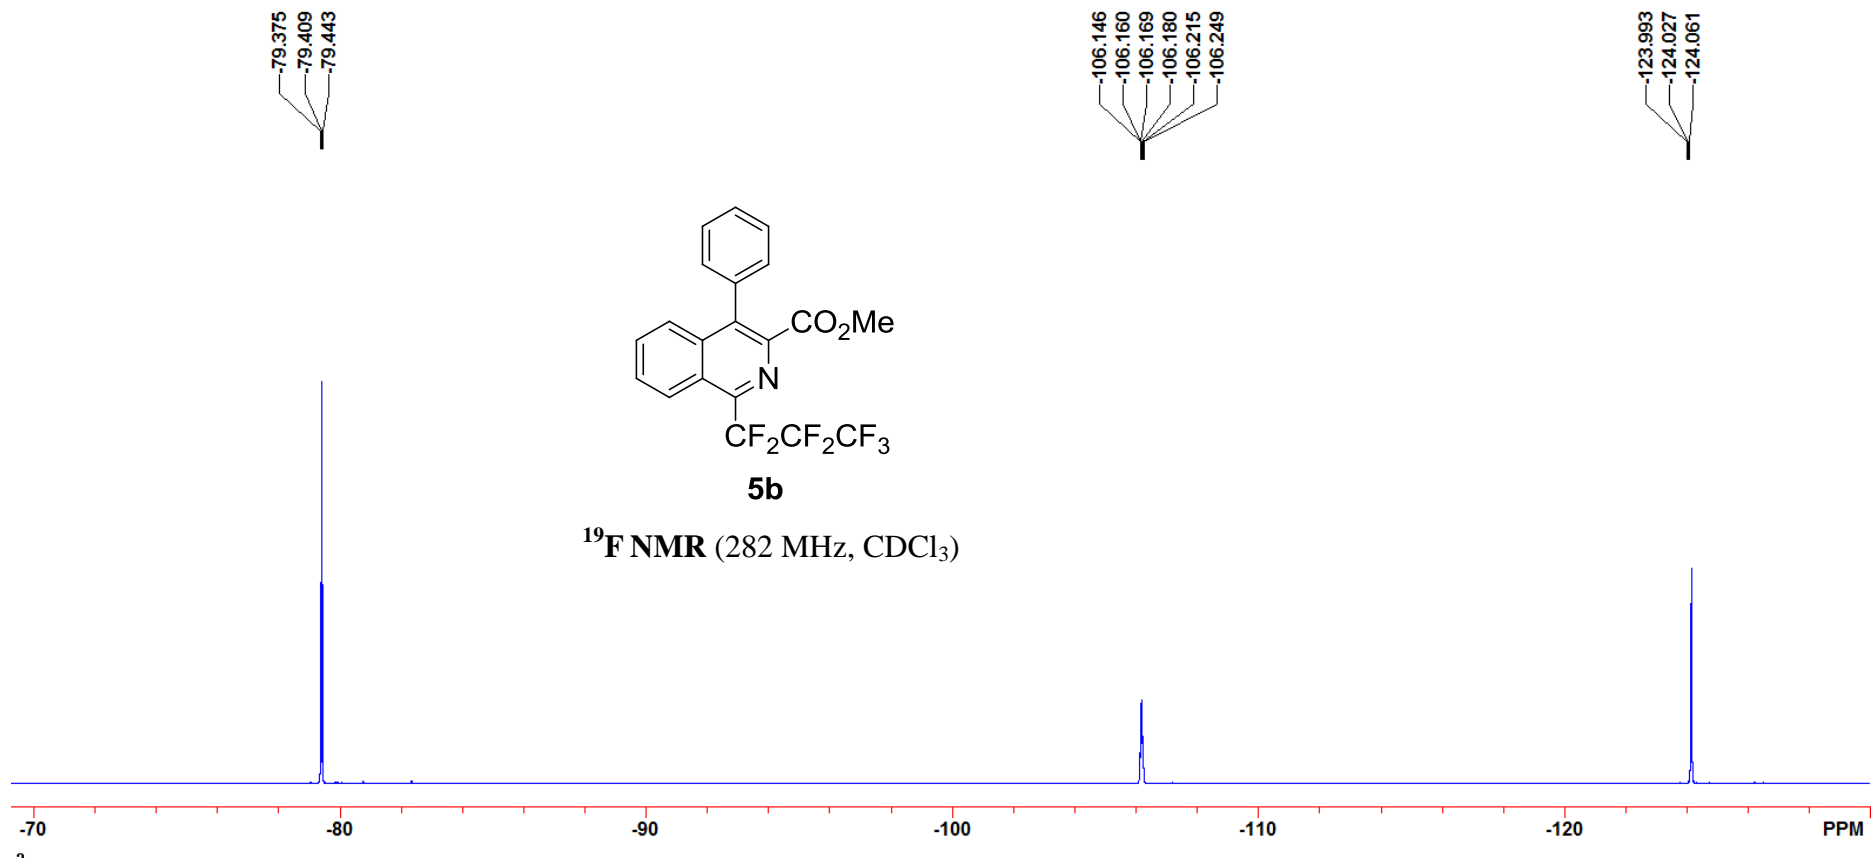

8.293  
8.274  
8.270  
8.267  
8.263  
7.642  
7.636  
7.620  
7.614  
7.610  
7.599  
7.583  
7.578  
7.561  
7.525  
7.513  
7.501  
7.489  
7.469  
7.451  
7.448  
7.434  
7.216  
7.213  
7.207  
7.196  
7.191  
7.185  
7.167  
4.534

3.593

-0.000

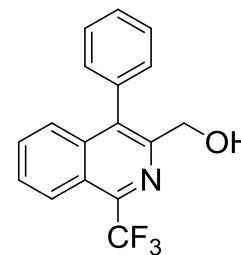

<sup>1</sup>H NMR (300 MHz, CDCl<sub>3</sub>)

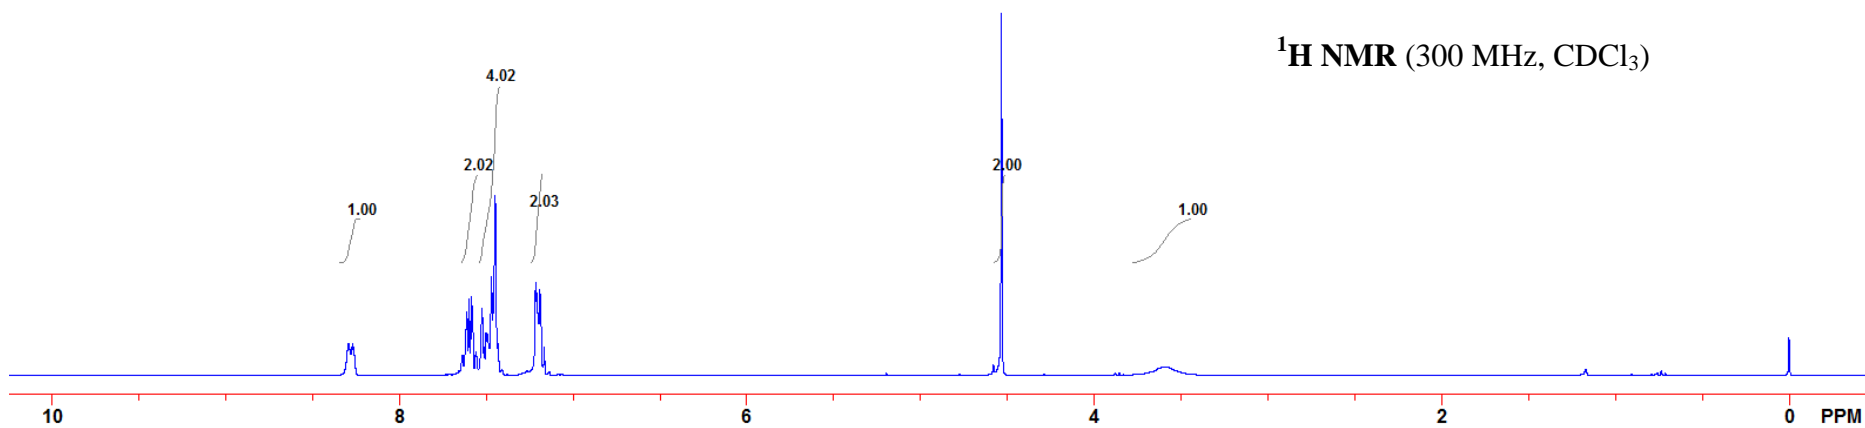



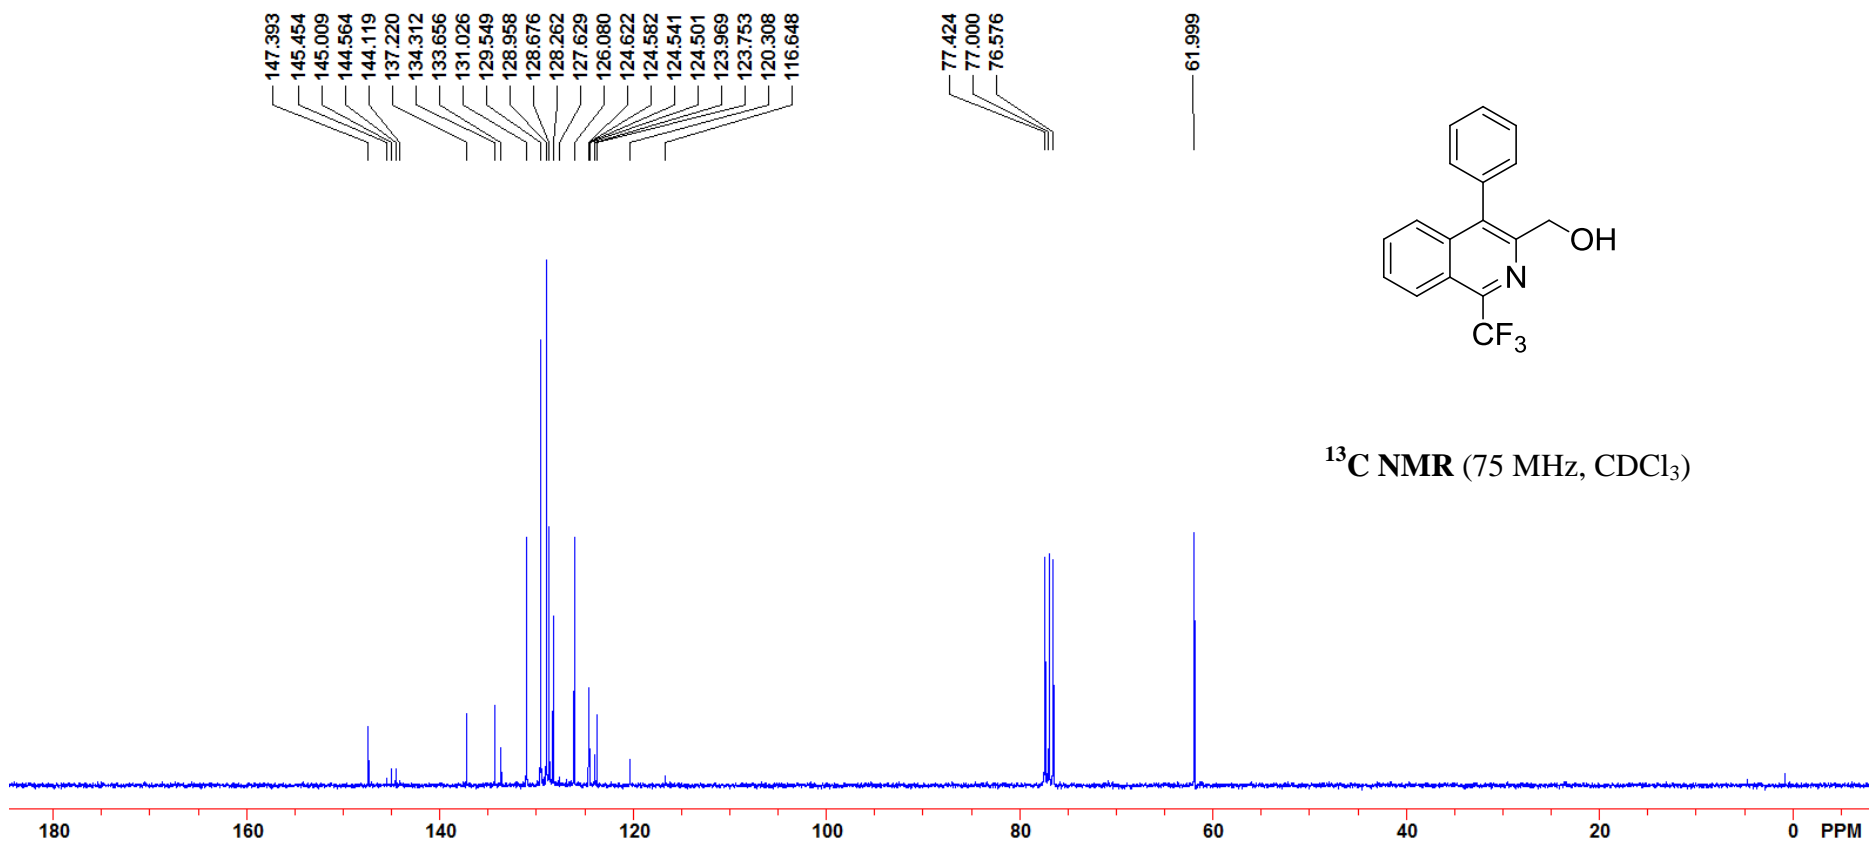

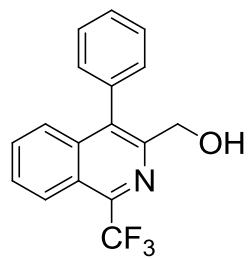

<sup>19</sup>F NMR (282 MHz, CDCl<sub>3</sub>)

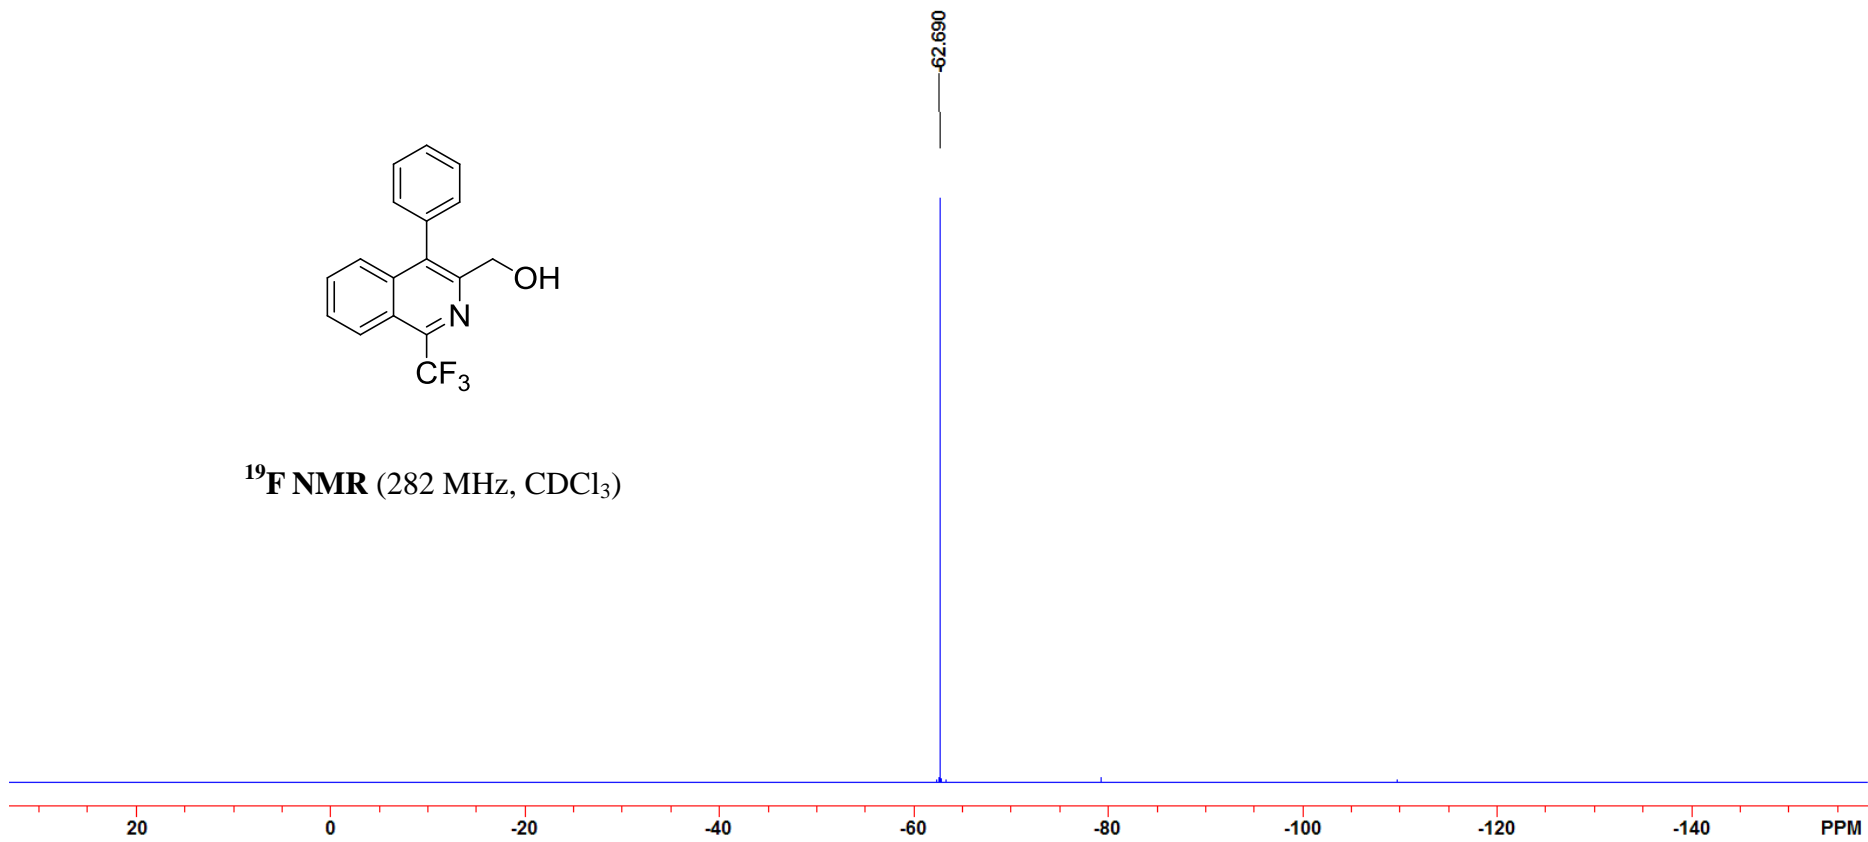

Supplement: c4ob02145b1.pdf [file c4ob02145b1.pdf]
